# Supplementary material for: Analysis of 200 000 exome-sequenced UK Biobank subjects illustrates the contribution of rare genetic variants to hyperlipidaemia
Source: HighWire-hosted journal article supplement (doi:10.1136/jmedgenet-2021-107752), 2021-04-28
Supplement: jmedgenet-2021-107752supp001_data_supplement.xlsx [file jmedgenet-2021-107752supp001_data_supplement.xlsx]

## Sheet: Contents
Analysis of 200,000 exome-sequenced UK Biobank subjects illustrates the contribution of rare genetic variants to hyperlipidaemia
David Curtis
Supplementary Tables
Supplementary Table S1: Gene SLPs
Table showing SLP for each gene for test of association of weighted burden score with hyperlipidaemia.
Supplementary Table S2: Set MLPs
Table showing MLP for each set of genes, excluding genes already noted to be of interest, in test of overall association of gene sent with hyperlipidaemia
Supplementary Table S3
Results for variant category analyses of genes significant at p<0.001 or previously implicated
For each category of variant is shown:
The number of separate locations a variant of that category occurs at
The number of times a variant of that category occurs in controls and cases
The average number of variants of that category seen per control or per case
The odds ratio with 95% confidence interval, including principal components and sex as covariates
The SLP associated with that odds ratio

## Sheet: Gene SLPs
Gene	SLP
LDLR	50.08
G6PC	5.55
SULT1E1	4.63
LOC101928415	4.5
SLC35G1	4.38
PLA2G5	4.15
CMTM7	3.99
MIR6716	3.95
COL4A2-AS2	3.85
DEFB131A	3.66
OTULIN	3.62
FAM122C	3.51
CMIP	3.48
EIF4B	3.45
PPP2R3B	3.41
HNRNPAB	3.38
PREB	3.37
PEX12	3.36
FAM167A	3.35
ABCG5	3.31
ABCD1	3.26
PRAF2	3.21
CTHRC1	3.16
SLC25A37	3.14
CT62	3.11
L1TD1	3.09
PIK3R6	3.09
FOXO3B	3.08
FAM47A	3.06
MIR6806	3.06
GCK	3.04
MAPKAPK2	3.02
HLA-A	3.01
CASK	2.98
NOS3	2.97
ZNF93	2.97
NR2C1	2.96
ECHDC3	2.95
MIR762HG	2.89
ADCY7	2.84
LOC101927572	2.82
GSDMC	2.81
GUCY1A1	2.81
SCN2A	2.8
OR2B3	2.8
HSD17B6	2.78
FATE1	2.75
ASMTL-AS1	2.74
MAGEB17	2.7
LOC101927858	2.69
PTGES3L-AARSD1	2.68
KCNN4	2.65
SEC62	2.65
STAT6	2.64
TIMD4	2.64
DENND4A	2.63
ATXN3	2.6
ACBD5	2.59
LOC112268091	2.59
BCAS2	2.57
CD99	2.57
LYL1	2.57
PARVG	2.57
ARHGAP30	2.56
VAMP5	2.56
ZNF48	2.55
IGFALS	2.54
LOC388813	2.54
KRTAP2-4	2.53
C5orf49	2.49
ZDHHC23	2.49
LOC107984336	2.48
GJB3	2.45
LOC102725227	2.44
HIST1H2AB	2.43
KBTBD3	2.43
GJA5	2.42
SAMD3	2.42
SECISBP2	2.42
MIR8077	2.42
LOC105372824	2.4
USP16	2.4
AMOT	2.39
ANKRD24	2.39
MYC	2.39
SLC24A2	2.38
PHEX-AS1	2.38
SLC6A15	2.37
CFD	2.36
IFITM2	2.36
OR52R1	2.36
TOX3	2.36
RMI2	2.35
EIF4G1	2.34
LOC100129034	2.34
LRRC72	2.34
TCF24	2.34
IFT172	2.33
LOC100507547	2.32
DXO	2.31
DNAJC11	2.3
SNX6	2.3
RPL27A	2.28
VEZF1	2.28
SLC10A6	2.27
LOC105375933	2.27
THEM4	2.27
TTC39C	2.27
VPS9D1	2.27
ANGPT2	2.26
CSNK1G1	2.26
LOC105369602	2.24
MBLAC2	2.24
CENPK	2.23
CNTNAP2	2.23
JAK1	2.23
OR8K3	2.21
PTTG1IP	2.21
MCPH1	2.2
MIR6750	2.2
CPB1	2.19
LAG3	2.19
MAFK	2.18
MAFIP	2.18
CD79A	2.17
EIF2B3	2.16
GZMH	2.16
LOC107984410	2.16
STARD4-AS1	2.16
STX1B	2.16
HRNR	2.15
KRTAP1-4	2.15
PIR-FIGF	2.15
RAB18	2.15
TJP3	2.15
FAM240A	2.13
KIF6	2.13
MIR6732	2.13
SCOC	2.12
FAM214B	2.11
NR1I2	2.11
DHCR24	2.1
GNAS-AS1	2.1
LYPD4	2.09
CFAP47	2.08
LMF1	2.08
LIPG	2.08
OR2L13	2.08
SUPV3L1	2.08
TTLL10-AS1	2.08
BAG5	2.07
CCDC144A	2.07
CCL8	2.07
BRDT	2.06
EVI5	2.06
ZNF296	2.05
ABHD10	2.04
CCDC141	2.04
FAM198B	2.04
LY86	2.04
RBM6	2.04
CYP1A1	2.02
DCUN1D4	2.02
LPL	2.02
DKFZP434K028	2.01
HGFAC	2.01
RPS7	2.01
LIPI	2.01
CACNA1E	2
DLL4	2
GAS2L3	1.99
IDH3A	1.98
APOL2	1.97
MFSD2A	1.97
OMA1	1.97
PLCH1	1.96
TBL1X	1.95
KLHL11	1.94
NKAPD1	1.94
CLRN3	1.93
HM13	1.93
PSMC3IP	1.93
TRAPPC5	1.93
VPS26A	1.93
GXYLT2	1.92
ELMO1	1.91
RXFP3	1.91
DLL3	1.9
GAB2	1.9
SDCBP2	1.9
LOC100507346	1.9
LOC102724020	1.9
MDGA2	1.9
NOVA1	1.9
RFPL4A	1.9
UNC5A	1.9
ACSL3	1.89
AIFM1	1.89
BMP15	1.89
CLEC12B	1.89
NOXA1	1.89
RASSF5	1.88
GAB3	1.87
KDM6A	1.87
SLC6A8	1.87
F8	1.86
SELENOH	1.86
NCKAP1	1.86
RASA4B	1.86
SLC25A5	1.86
TRAF7	1.86
TTC32	1.86
SERPINF2	1.85
RAMP2	1.85
RIMS3	1.85
WDR70	1.85
C16orf71	1.84
GPX7	1.84
HIST3H2BB	1.84
TBC1D8B	1.84
THSD1	1.84
BACE1	1.83
DENND2A	1.83
DNAJB13	1.83
RWDD3	1.83
LOC107984263	1.83
LOC105374009	1.83
NDUFS1	1.83
CSDC2	1.82
CYB561	1.82
SH2B3	1.82
PRDM9	1.82
DRAM2	1.81
LOC105371683	1.81
MRI1	1.81
ZMAT4	1.81
MEN1	1.8
PAGE5	1.8
PSME1	1.8
ALB	1.79
ENG	1.79
H2AFJ	1.79
LOC105371046	1.79
LOC105372768	1.79
PEAR1	1.79
SUMO2	1.79
UMOD	1.79
CD160	1.78
CER1	1.78
DUS2	1.78
EEF1A2	1.78
RSAD1	1.78
RSPH10B	1.78
SCRN1	1.78
LOC101929524	1.78
NME7	1.78
NXPH2	1.78
ZNF605	1.78
DNM1	1.77
LIM2	1.77
UBALD2	1.77
DGKQ	1.76
EFNA4	1.76
SLAMF7	1.76
LOC107984851	1.76
RBP2	1.76
RDX	1.76
PTPRT	1.76
AURKA	1.75
SDCCAG8	1.75
KLF15	1.75
LOC107984746	1.75
ZSCAN12	1.75
LOC105371744	1.74
MIR935	1.74
RHOJ	1.74
TSSK1B	1.74
VSTM2A-OT1	1.74
APOA5	1.73
ATL3	1.73
DEGS2	1.72
HMGN5	1.72
RPL39	1.72
SNORD59A	1.72
TMEM181	1.72
USP42	1.72
UHRF1BP1	1.72
AWAT2	1.71
GP2	1.71
SHOX2	1.71
LOC102723321	1.71
LOC107987264	1.71
PCYT1B	1.71
PLIN4	1.71
ST7	1.71
TET3	1.71
TPRX1	1.71
ZNF607	1.71
SHC1	1.7
LOC101059915	1.7
LOC112268270	1.7
MIR5090	1.7
MIR3187	1.7
MXI1	1.7
TMEM184B	1.7
ZNF846	1.7
COX15	1.69
LITAF	1.69
MDN1	1.69
PROS1	1.69
SIRPB2	1.69
TMPRSS11D	1.69
AP5B1	1.68
CERS5	1.68
KLRF1	1.68
LOC105377056	1.68
MILR1	1.68
PAX1	1.68
ABHD13	1.67
CAPS2	1.67
CFAP69	1.67
PCDH11X	1.67
PRR4	1.67
SLC29A2	1.67
ANGPTL6	1.66
DNAJC17	1.66
GNAS	1.66
HSD17B8	1.66
NACC2	1.66
NCEH1	1.66
TAS2R9	1.66
VMO1	1.66
VSIG4	1.66
CASTOR3	1.65
FOLH1B	1.65
RP1L1	1.65
LOC101929444	1.65
LOC105373608	1.65
MAMSTR	1.65
MAPKBP1	1.65
MIR1-1HG	1.65
NUDT1	1.65
TMEM26-AS1	1.65
COMMD10	1.64
SKOR1	1.64
LY6G5B	1.64
NDUFAF7	1.64
RAB22A	1.64
CLLU1OS	1.63
OR6C68	1.63
WDR33	1.63
NLGN4X	1.62
ORMDL3	1.62
FAM117A	1.61
GALNT9	1.61
SH3GL3	1.61
TBC1D28	1.61
TOLLIP	1.61
ABCB4	1.6
ANKRD1	1.6
BTNL9	1.6
CCL15-CCL14	1.6
LONRF1	1.6
PRPF19	1.6
PSME3	1.6
PURA	1.6
ZNF75D	1.6
CCL14	1.59
DTX3L	1.59
IRS4	1.59
LIN37	1.59
PROM1	1.59
TRABD2A	1.59
ARHGAP4	1.58
CNIH4	1.58
DLG3	1.58
ETFB	1.58
LONRF3	1.58
MYOZ3	1.58
OSTN-AS1	1.58
RASSF6	1.58
TPRG1	1.58
UQCC1	1.58
NSMF	1.57
OR2T8	1.57
PHF8	1.57
ANKMY2	1.56
HIST1H2AK	1.56
LOC100507513	1.56
LOC107985588	1.56
PARD3	1.56
PPP1R26	1.56
RAB40A	1.56
TCEAL1	1.56
DERA	1.55
DIO1	1.55
GRM3	1.55
SAMD4B	1.55
KDM4D	1.55
MINDY1	1.55
PDZD4	1.55
SNORD13C	1.55
TGFBR3L	1.55
AP1S2	1.54
AP3S1	1.54
C22orf42	1.54
CD300H	1.54
DCLRE1CP1	1.54
GUCY2F	1.54
HUWE1	1.54
SLC12A7	1.54
MUC22	1.54
PAH	1.54
SNCAIP	1.54
TRA2A	1.54
ZNF573	1.54
ZNF630-AS1	1.54
ACTR5	1.53
ARPC2	1.53
ARMH3	1.53
CDH5	1.53
KMT2A	1.53
OCRL	1.53
OR5AK2	1.53
RHCE	1.53
COMMD1	1.52
GADL1	1.52
HNRNPA1L2	1.52
SIGLEC7	1.52
SLC22A9	1.52
SHANK3	1.52
LOC107986413	1.52
ZNF267	1.52
ZNF664	1.52
C15orf39	1.51
DDC	1.51
DLC1	1.51
DYNLT3	1.51
EFCAB1	1.51
RFC4	1.51
TBC1D22B	1.51
TRMT2B	1.51
TSPYL1	1.51
ATP13A5-AS1	1.5
ATP4A	1.5
CBLN1	1.5
HLA-DQB1	1.5
HPRT1	1.5
RPL23A	1.5
PPCDC	1.5
USP46	1.5
DNA2	1.49
EHMT1	1.49
JUND	1.49
MED10	1.49
PPIB	1.49
CDNF	1.48
CCNB3	1.48
DACT3	1.48
EPOP	1.48
GPKOW	1.48
HBEGF	1.48
LOC107986366	1.48
LRFN4	1.48
ORAI2	1.48
STAT5B	1.48
ST6GALNAC2	1.48
C3orf70	1.47
CAMKV	1.47
COQ8A	1.47
FAM241A	1.47
GJA1	1.47
GOLGB1	1.47
KRT24	1.47
LCN1	1.47
OR10H2	1.47
PCDH8	1.47
WASHC5	1.47
ADAMTSL4	1.46
AR	1.46
CAMSAP1	1.46
CRABP2	1.46
EP400	1.46
LOC101927330	1.46
LOC107984755	1.46
MED6	1.46
MRPL58	1.46
RIOX2	1.46
TDRKH	1.46
ARMCX5	1.45
FMO1	1.45
SHBG	1.45
LOC101928120	1.45
LOC105371529	1.45
MC1R	1.45
PI3	1.45
TLR10	1.45
TNRC6B	1.45
ZBTB7B	1.45
ZSWIM6	1.45
BIK	1.44
CCDC70	1.44
CLCN5	1.44
GABARAP	1.44
KLHL40	1.44
SIL1	1.44
LOC105372589	1.44
LOC107986114	1.44
PLEKHA3	1.44
SLC6A1	1.44
SRSF2	1.44
TAF1	1.44
TIRAP	1.44
XBP1	1.44
ZNF620	1.44
ZNF836	1.44
ASMT	1.43
COQ5	1.43
GHSR	1.43
SDR42E1	1.43
MAPK1IP1L	1.43
NXPH1	1.43
PELP1	1.43
PRKAR2A	1.43
STAT5A	1.43
WDR19	1.43
ALDH1A3	1.42
C2orf50	1.42
DIAPH2	1.42
ESD	1.42
IFT140	1.42
ITGAL	1.42
LOC105372272	1.42
LOC105374065	1.42
ARHGAP18	1.41
C7	1.41
C5orf51	1.41
C9orf152	1.41
CCDC81	1.41
EXOC7	1.41
IGF2BP3	1.41
LOC112268267	1.41
MARK1	1.41
MTMR8	1.41
PIK3CB	1.41
PLAGL2	1.41
PNLDC1	1.41
SRL	1.41
F11R	1.4
FES	1.4
FLVCR1	1.4
RTF1	1.4
LEPROT	1.4
MYO5A	1.4
AARSD1	1.39
SCG2	1.39
KLF16	1.39
LOC100288966	1.39
LOC100289061	1.39
LOC105370906	1.39
MAG	1.39
NLGN3	1.39
OPN1MW	1.39
OPN4	1.39
RCC1	1.39
U2AF2	1.39
VLDLR	1.39
EIF5B	1.38
GHRHR	1.38
GPR143	1.38
HTD2	1.38
RRS1	1.38
SAMSN1-AS1	1.38
LOC107985023	1.38
LOC339862	1.38
METTL2B	1.38
PAFAH1B1	1.38
SLC6A17	1.38
TAS2R16	1.38
USP3-AS1	1.38
ZBTB11	1.38
ATXN2	1.37
BBS9	1.37
EXOC3L2	1.37
HNRNPH2	1.37
KRT16	1.37
MRNIP	1.37
2003-03-01	1.37
MIR3064	1.37
MIR3132	1.37
NDP-AS1	1.37
OR52N5	1.37
RBM12	1.37
SLC35G4	1.37
SS18L2	1.37
ZNF138	1.37
ZNF496	1.37
C1orf50	1.36
EIF1	1.36
FGB	1.36
GCNA	1.36
HDAC7	1.36
HUNK	1.36
LEMD3	1.36
LOC102723817	1.36
LOC105374048	1.36
PHLPP1	1.36
ZBTB8OS	1.36
BMP1	1.35
CCDC178	1.35
CHGB	1.35
HPF1	1.35
IL32	1.35
LOC105376411	1.35
MFSD6L	1.35
NR0B1	1.35
ONECUT2	1.35
PIN4	1.35
SPCS1	1.35
SPPL3	1.35
SRPX2	1.35
SUB1	1.35
VCX3B	1.35
ADTRP	1.34
BCAM	1.34
CACNA1I	1.34
CLCN4	1.34
ITIH6	1.34
ISL2	1.34
LOC100130744	1.34
LOC105378726	1.34
LOC112268038	1.34
MCM3	1.34
MEIOC	1.34
MVD	1.34
PTS	1.34
ZSCAN1	1.34
ANKRD30B	1.33
AQP4-AS1	1.33
ATRX	1.33
C1QTNF9B	1.33
DBNDD1	1.33
EDN2	1.33
EXT1	1.33
FAM189A1	1.33
GRK5	1.33
MIXL1	1.33
OR10A3	1.33
PRAMEF14	1.33
SMARCD1	1.33
TMED10	1.33
TTLL12	1.33
TNFAIP8L2	1.33
YIF1A	1.33
ABCB5	1.32
ARHGEF6	1.32
C8orf74	1.32
DCANP1	1.32
DLG1	1.32
RNF128	1.32
LELP1	1.32
LOC105371855	1.32
TXNIP	1.32
WDSUB1	1.32
ACBD3-AS1	1.31
ASB16	1.31
BAHCC1	1.31
BAGE5	1.31
BEND4	1.31
CCDC92	1.31
DDX5	1.31
EEF1A1	1.31
GTPBP1	1.31
GSTP1	1.31
HP1BP3	1.31
IL1RL1	1.31
JAG2	1.31
LOC101928351	1.31
LOC100131496	1.31
LOC105374811	1.31
NAT6	1.31
NRN1L	1.31
NUDT14	1.31
SLC11A2	1.31
TCEAL2	1.31
TIMP1	1.31
A1BG	1.3
AJM1	1.3
CD2	1.3
CDC25B	1.3
HLA-DRB4	1.3
HLA-DRB3	1.3
HLA-DRB5	1.3
INSIG2	1.3
NKRF	1.3
NPR1	1.3
PRDM8	1.3
CLEC19A	1.29
DENND6B	1.29
GABRA3	1.29
HMCN1	1.29
SAMD8	1.29
LINC01600	1.29
LOC101928477	1.29
LOC101929160	1.29
LOC105616981	1.29
MIR632	1.29
MTRNR2L5	1.29
OR9I1	1.29
OR9G9	1.29
PNKD	1.29
PRAMEF27	1.29
RELA	1.29
SMIM13	1.29
SPNS2	1.29
TRIM23	1.29
TRPC5OS	1.29
ZNF492	1.29
ATP13A4-AS1	1.28
C2-AS1	1.28
FAM35A	1.28
GDAP2	1.28
IGBP1	1.28
MIR6822	1.28
MIR6867	1.28
PLA2G6	1.28
SORT1	1.28
SPRR2G	1.28
TAS2R45	1.28
TAS2R46	1.28
TMEM47	1.28
WFDC6	1.28
XPO1	1.28
ADGRF2	1.27
ARR3	1.27
C16orf74	1.27
CCZ1B	1.27
CLIP1	1.27
COG6	1.27
EIF2B5	1.27
ERBIN	1.27
IER2	1.27
RRAD	1.27
INTS11	1.27
LCE3E	1.27
MC4R	1.27
MED9	1.27
POU4F3	1.27
SRP54	1.27
STUB1	1.27
SUGP2	1.27
UBAC2	1.27
TPI1	1.27
ZNF91	1.27
AGXT	1.26
CCL23	1.26
DGCR2	1.26
DKC1	1.26
IGFBP4	1.26
LTV1	1.26
MRAP2	1.26
SLC26A9	1.26
SOX2-OT	1.26
WHRN	1.26
ADORA2B	1.25
CNIH2	1.25
ERN2	1.25
FAM177B	1.25
FPR2	1.25
GABRB2	1.25
KRTAP10-11	1.25
SENP3-EIF4A1	1.25
LDLRAD2	1.25
LL0XNC01-250H12.3	1.25
LOC107984347	1.25
MED14	1.25
MIR6744	1.25
PRAMEF15	1.25
TFF1	1.25
TMPRSS5	1.25
UPF3B	1.25
WNT8B	1.25
ZNF263	1.25
C6orf223	1.24
CA3	1.24
FAM71F2	1.24
LOC105373155	1.24
LOC105371836	1.24
LOC107985162	1.24
LSM10	1.24
MRPS15	1.24
NRAP	1.24
PCNX4	1.24
PPP1R14C	1.24
PQBP1	1.24
RAB3GAP2	1.24
RBMS2	1.24
RECQL5	1.24
RFPL4B	1.24
SLC9A1	1.24
SNORA40	1.24
THEM5	1.24
TRAPPC6A	1.24
TTYH1	1.24
ADAM23	1.23
AMIGO1	1.23
CSAG3	1.23
RNMT	1.23
IL6R	1.23
MIR4444-1	1.23
MIR136	1.23
MPPE1	1.23
PLEKHO2	1.23
PLRG1	1.23
PFDN6	1.23
SNX22	1.23
SRD5A3-AS1	1.23
ZNF287	1.23
ARHGAP42	1.22
COL4A6	1.22
CCND1	1.22
FRS2	1.22
H1FX	1.22
HIST3H2A	1.22
SERTAD4	1.22
LOC102723381	1.22
LOC112268103	1.22
LTBP2	1.22
MAPK12	1.22
MIR6515	1.22
SLC9A3	1.22
SPTA1	1.22
TST	1.22
UXT	1.22
ABCA13	1.21
AMPD2	1.21
ANKDD1A	1.21
CACNA1D	1.21
CAMTA2	1.21
CPA1	1.21
SAP130	1.21
LOC105375436	1.21
LOC105370918	1.21
NINJ1	1.21
OAF	1.21
PA2G4	1.21
PTCD2	1.21
SP140	1.21
SRP68	1.21
SWSAP1	1.21
UBE2U	1.21
ZNF157	1.21
ADRA2A	1.2
BNC1	1.2
BNIP3L	1.2
CHD7	1.2
EIF1AD	1.2
ERI2	1.2
FCGR2B	1.2
HSPBAP1	1.2
SCT	1.2
LOC105371380	1.2
LOC105373020	1.2
MAP3K21	1.2
MICU2	1.2
MR1	1.2
NAXE	1.2
PPP1R13B	1.2
PRSS1	1.2
RAB41	1.2
RGS14	1.2
SMARCA1	1.2
STK16	1.2
SULT1C2	1.2
TNFSF4	1.2
WNT7B	1.2
ZBTB16	1.2
ZMPSTE24	1.2
ACTN1	1.19
CD47	1.19
C3orf38	1.19
CTSS	1.19
FAM19A1	1.19
GHRH	1.19
GRM2	1.19
HERPUD2	1.19
IDS	1.19
SAMD9L	1.19
KCTD12	1.19
LDOC1	1.19
LOC107986597	1.19
MED16	1.19
OR2J2	1.19
PPP2R2B	1.19
POLH	1.19
PTGES3L	1.19
RIMBP3	1.19
SNORD150	1.19
SOS2	1.19
SYT7	1.19
ATP6V0B	1.18
CEACAM3	1.18
SCO2	1.18
KCNK4-TEX40	1.18
KLHL29	1.18
LOC101927793	1.18
MAGEB16	1.18
MED4	1.18
PML	1.18
PPM1N	1.18
PGAM4	1.18
PVRIG	1.18
SYNGR3	1.18
VN1R5	1.18
ZNF516	1.18
ZSCAN30	1.18
CREBL2	1.17
RNASE7	1.17
SH2D6	1.17
PARP4	1.17
PNCK	1.17
RD3	1.17
SNRPD2	1.17
SNORD66	1.17
STAU1	1.17
TDRD10	1.17
TENM1	1.17
THAP11	1.17
TTLL3	1.17
CCDC158	1.16
CPLX4	1.16
EBLN1	1.16
GCKR	1.16
SELP	1.16
SH2D1B	1.16
LOC100507551	1.16
SLC25A16	1.16
LOC105373124	1.16
LOC105369971	1.16
MMP20	1.16
MUCL1	1.16
NAF1	1.16
OR4F15	1.16
PDHB	1.16
SP3	1.16
SSMEM1	1.16
SUMO4	1.16
TRIM3	1.16
TOMM40	1.16
ARPC1B	1.15
ATP8B1	1.15
C16orf46	1.15
CREBRF	1.15
DEFB103A	1.15
FBXL8	1.15
GALNT17	1.15
KCTD21	1.15
LMO7-AS1	1.15
LOC101928335	1.15
MIR6763	1.15
NCKIPSD	1.15
TMEM107	1.15
ZNF527	1.15
AJUBA	1.14
AP5S1	1.14
BEX4	1.14
C11orf49	1.14
FAM110A	1.14
FRAS1	1.14
MYLK-AS1	1.14
NPIPA8	1.14
OTOG	1.14
PBDC1	1.14
PRC1	1.14
RAB42	1.14
SNORA63	1.14
YTHDF1	1.14
ABCC2	1.13
ASTE1	1.13
ATP2B2	1.13
CCL15	1.13
CEP55	1.13
CHML	1.13
ENOSF1	1.13
EME1	1.13
GBF1	1.13
RNF20	1.13
LOC105375842	1.13
LOC105379282	1.13
LOC105379281	1.13
LOC105379280	1.13
LOC105379279	1.13
LOC107987175	1.13
MAOA	1.13
MIR7106	1.13
OLFML2A	1.13
OR2G6	1.13
OR2W1	1.13
PLXNA4	1.13
RAI2	1.13
SLC51A	1.13
TAOK3	1.13
TXNDC8	1.13
TMEM82	1.13
UGT2A1	1.13
CHRM3	1.12
EIF2D	1.12
EXO1	1.12
FOXN4	1.12
GCAT	1.12
HDAC6	1.12
RUFY2	1.12
SBNO2	1.12
LOC102724691	1.12
MYBPC2	1.12
OR2H1	1.12
PHACTR4	1.12
PDHA1	1.12
PRMT8	1.12
RGS16	1.12
TIGIT	1.12
TRIM38	1.12
TTC28	1.12
C2CD4A	1.11
CADPS2	1.11
CCDC144NL	1.11
CX3CR1	1.11
EIF4E	1.11
ERCC6	1.11
FHL2	1.11
FNDC9	1.11
RNF115	1.11
IL20	1.11
ITGB1	1.11
JPH1	1.11
LAMA5	1.11
LOC105372815	1.11
LRRC37B	1.11
RETN	1.11
SRP19	1.11
SYT3	1.11
ADO	1.1
ATP2B3	1.1
CFAP54	1.1
DERL1	1.1
FAM227A	1.1
GEMIN2	1.1
HDAC5	1.1
JRK	1.1
LOC101927023	1.1
LOC101929705	1.1
LOC107986717	1.1
LOC107985405	1.1
LONRF2	1.1
LRRC42	1.1
MIR6825	1.1
MRPL37	1.1
NPEPL1	1.1
OVOL3	1.1
PIM3	1.1
PABPC1L	1.1
TARP	1.1
TIGD5	1.1
UMODL1-AS1	1.1
VKORC1	1.1
ZFAND3	1.1
C4orf17	1.09
C9orf24	1.09
CIAO1	1.09
CYB5B	1.09
GALNT3	1.09
IL31RA	1.09
LOC105369529	1.09
LOC101929021	1.09
LOC105373310	1.09
LOC105375789	1.09
LOC107986578	1.09
METTL22	1.09
MIR6789	1.09
MIR4761	1.09
MRPL44	1.09
PGAM1	1.09
PSMA4	1.09
TBL3	1.09
UBAC1	1.09
ACSM3	1.08
AGK	1.08
CASKIN1	1.08
CNTFR-AS1	1.08
CPNE2	1.08
DLG2	1.08
H2AFZ	1.08
H1FOO	1.08
HKDC1	1.08
IRAK1	1.08
KIF14	1.08
KRT83	1.08
LOC107986526	1.08
LOC105378311	1.08
LOC285095	1.08
MAN2A1	1.08
MIR6839	1.08
NDST3	1.08
OLIG3	1.08
PCNA-AS1	1.08
RAX2	1.08
SLC35B2	1.08
SLC6A14	1.08
SMAD4	1.08
SMIM27	1.08
STK11IP	1.08
TK1	1.08
TMEM212	1.08
TTC1	1.08
TUBA3C	1.08
USP22	1.08
WDR5	1.08
BORA	1.07
DPH1	1.07
FAM129C	1.07
FANCC	1.07
SHROOM2	1.07
LOC107984343	1.07
MYOM1	1.07
OTX1	1.07
TMEM154	1.07
TRIAP1	1.07
USP54	1.07
ANAPC15	1.06
ANKRD6	1.06
C11orf52	1.06
CEACAM7	1.06
CMC1	1.06
CYP8B1	1.06
DTX2	1.06
EMP2	1.06
GPR4	1.06
GPR39	1.06
SLC17A8	1.06
MIR6738	1.06
MIR4746	1.06
MAPKAP1	1.06
MCEE	1.06
PLCG2	1.06
PCYOX1L	1.06
PNPLA8	1.06
POLR2K	1.06
PROCA1	1.06
PSMB7	1.06
SLC48A1	1.06
SPRR1B	1.06
TSR3	1.06
TNFRSF9	1.06
UNC45B	1.06
AANAT	1.05
ANAPC1P1	1.05
BCLAF3	1.05
BUB1B-PAK6	1.05
CAPN6	1.05
CDH24	1.05
CFAP99	1.05
CYB561D2	1.05
DLX3	1.05
GORASP2	1.05
HYPK	1.05
RNASE3	1.05
SCGN	1.05
LOC100268168	1.05
LINC01237	1.05
LOC105369340	1.05
MSTO2P	1.05
OR4P4	1.05
OSTN	1.05
PAK1	1.05
POLR2C	1.05
POU1F1	1.05
RABL2B	1.05
SLC9A8	1.05
TAS2R39	1.05
TXNDC11	1.05
TNFSF13	1.05
TOMM40L	1.05
UNC93B1	1.05
UNC5C	1.05
UHRF1	1.05
ZNF706	1.05
ADAM9	1.04
ATAD5	1.04
B4GALT3	1.04
BLVRA	1.04
BSPRY	1.04
CALCRL	1.04
FAM47B	1.04
FAM3D-AS1	1.04
FAM86B1	1.04
HMG20B	1.04
LOC400710	1.04
MORN5	1.04
MRPS33	1.04
PGS1	1.04
POFUT1	1.04
VPS53	1.04
ASF1A	1.03
CD276	1.03
CEBPZOS	1.03
CLCA4	1.03
CHD9	1.03
CRTAM	1.03
CXorf40A	1.03
FAM131A	1.03
FER	1.03
HECTD4	1.03
GRIN2A	1.03
RNF187	1.03
SCOC-AS1	1.03
LOC105369745	1.03
LOC105373331	1.03
LOC105378926	1.03
PRR31	1.03
SMDT1	1.03
SRGN	1.03
TLL2	1.03
TMEM38B	1.03
YBX1	1.03
ZNF449	1.03
ABCA6	1.02
ACY3	1.02
ARL14EPL	1.02
ATP5MC1	1.02
C14orf132	1.02
C9orf43	1.02
CBLL2	1.02
CLIC1	1.02
EFCAB11	1.02
ERBB2	1.02
GNLY	1.02
GPR108	1.02
RPS19BP1	1.02
IL13RA1	1.02
KCNIP4	1.02
2007-09-01	1.02
LDLRAD3	1.02
LINC00637	1.02
LOC105373790	1.02
ME1	1.02
MXD4	1.02
NOP56	1.02
NUP155	1.02
OR5AU1	1.02
PCBP2	1.02
PAXIP1	1.02
PGBD5	1.02
SLC45A4	1.02
SMG8	1.02
THOC7	1.02
TMEM86B	1.02
TRIM27	1.02
UCKL1	1.02
AKAP8	1.01
AMPH	1.01
CD1E	1.01
DEFB112	1.01
DMAC1	1.01
FAM214A	1.01
ITGB3BP	1.01
SHISAL2B	1.01
LOC105371814	1.01
LOC105373786	1.01
LRRC23	1.01
OR51G2	1.01
OR52D1	1.01
PCYT1A	1.01
PTOV1	1.01
STUM	1.01
TMEM120B	1.01
UBE2W	1.01
XDH	1.01
YEATS2	1.01
ZNF286B	1.01
ZNF439	1.01
ZNF385D-AS1	1.01
ZNF608	1.01
BRI3BP	1
CAMK1	1
CNPY3	1
DAPL1	1
ELMO1-AS1	1
GJC1	1
HACD1	1
HIRA	1
HHLA3	1
HSD17B11	1
RNF6	1
KRTAP4-5	1
KLHL14	1
KRT25	1
LOC101060553	1
LOC105371729	1
MAB21L2	1
LOC112268030	1
MIR4722	1
NRTN	1
NSMAF	1
NT5C3A	1
PRSS48	1
RALA	1
SLC30A4	1
SPATS1	1
SPON1	1
STK10	1
TFB1M	1
TMEM121	1
TRPV3	1
WDR4	1
ZBTB39	1
ALKBH6	0.99
ANKRD13A	0.99
C9orf41-AS1	0.99
DEFB105A	0.99
FKBP14	0.99
GDPD4	0.99
HNF4A	0.99
SARDH	0.99
JMY	0.99
LDAH	0.99
LINC01387	0.99
LOC107985219	0.99
MBL2	0.99
MGAT2	0.99
MON2	0.99
PAX9	0.99
PDHA2	0.99
RB1CC1	0.99
RBM39	0.99
SPCS2	0.99
ST3GAL1	0.99
TAS2R7	0.99
UBE2QL1	0.99
UBTD1	0.99
ZC3H14	0.99
ALDH3B2	0.98
CLEC2D	0.98
CTB-3M24.3	0.98
GHITM	0.98
GTPBP4	0.98
IL17RD	0.98
IL18R1	0.98
RSF1	0.98
KCNJ13	0.98
KLF8	0.98
LOC101929185	0.98
LOC105374425	0.98
LOC105377285	0.98
LOC107985050	0.98
MBD3	0.98
MMS19	0.98
MYO9A	0.98
NAA10	0.98
SPIN1	0.98
TDGF1	0.98
ADA2	0.97
AFAP1	0.97
ALDH4A1	0.97
AIPL1	0.97
CCDC103	0.97
CD300C	0.97
CHD6	0.97
CMTM3	0.97
DCDC2C	0.97
GRHL3	0.97
GVQW2	0.97
HDHD2	0.97
HTR3B	0.97
RPN1	0.97
IL20RB	0.97
SELENOK	0.97
LMNTD2	0.97
SLC25A21-AS1	0.97
SLC25A53	0.97
LCE3D	0.97
LOC105372141	0.97
LOC107985032	0.97
MIR100HG	0.97
MSANTD4	0.97
MEIS2	0.97
MOSPD2	0.97
MYCT1	0.97
NRM	0.97
NPR2	0.97
P4HA2	0.97
PAPPA2	0.97
PTCD3	0.97
SNORD124	0.97
TRIM6	0.97
TSC1	0.97
ZC3H7B	0.97
ACOX1	0.96
ALAD	0.96
ATP6V1E1	0.96
BCKDHB	0.96
CATSPER4	0.96
CDK13	0.96
CST9	0.96
DCAF8L2	0.96
ERMARD	0.96
HEXA	0.96
RNF141	0.96
RYK	0.96
INCENP	0.96
LOC107986158	0.96
LOC105375691	0.96
NDUFB4	0.96
NME1-NME2	0.96
NME2	0.96
OR52N1	0.96
PCOTH	0.96
PRICKLE1	0.96
RAG2	0.96
SMARCD3	0.96
SMIM29	0.96
SPTLC1	0.96
SUCLG2	0.96
TET2	0.96
THNSL2	0.96
TMCO6	0.96
ZDHHC14	0.96
ZNF397	0.96
ALS2CR12	0.95
CA14	0.95
DCC	0.95
SELL	0.95
KRT14	0.95
LAX1	0.95
SHISAL1	0.95
LOC101928123	0.95
LOC107984190	0.95
MBIP	0.95
OR1S2	0.95
PRSS54	0.95
RBM11	0.95
TMEM150C	0.95
USH1C	0.95
ACE2	0.94
B3GNT4	0.94
BCL9L	0.94
C1orf122	0.94
CAMLG	0.94
CBFA2T3	0.94
CLLU1	0.94
COX10	0.94
CSTF2	0.94
DDAH2	0.94
DHRS4	0.94
EVPLL	0.94
FAM118B	0.94
FAM47C	0.94
GAS2	0.94
GRIK1	0.94
SDR9C7	0.94
KCNMA1	0.94
LILRA5	0.94
LIAS	0.94
LMX1B	0.94
SLC25A1	0.94
LOC101929595	0.94
LOC101928021	0.94
LOC105369668	0.94
LOC105370786	0.94
LOC105376078	0.94
LOC105371768	0.94
MPC2	0.94
NANS	0.94
NEUROD4	0.94
NSF	0.94
OR10K2	0.94
OR3A1	0.94
OR4K17	0.94
PEX2	0.94
PPP2R5C	0.94
POLL	0.94
RD3L	0.94
SIX3	0.94
SNORD95	0.94
THOC2	0.94
TNN	0.94
VCX	0.94
VAX1	0.94
ZMYND8	0.94
ZNF28	0.94
ABCE1	0.93
ADAMTS1	0.93
ALKBH1	0.93
AP4S1	0.93
CCDC7	0.93
CLEC12A	0.93
CREB3L3	0.93
CPVL	0.93
DISC2	0.93
EGFLAM	0.93
GPR150	0.93
KRT12	0.93
SH3RF3-AS1	0.93
LOC100506071	0.93
LOC101927168	0.93
LOC105377524	0.93
LOC105375095	0.93
MIR6730	0.93
NAA16	0.93
PHF21A	0.93
PPP1R16A	0.93
PPP4R1	0.93
RANBP2	0.93
SLITRK2	0.93
SMNDC1	0.93
SPOCK3	0.93
SUCLA2	0.93
ZBTB3	0.93
ACBD7-DCLRE1CP1	0.92
ADCY1	0.92
ARL4A	0.92
BTF3	0.92
C3	0.92
CCDC77	0.92
CDH15	0.92
CELF5	0.92
CSNK2A1	0.92
CT47B1	0.92
DPEP2	0.92
ERMAP	0.92
HILPDA	0.92
INHBA	0.92
IRF2BP2	0.92
SDC4	0.92
SLC24A3	0.92
LOC107985500	0.92
MLXIPL	0.92
MTOR	0.92
NUDT16L1	0.92
OR52E6	0.92
SLC8A3	0.92
SOX21	0.92
TMEM155	0.92
TMEM175	0.92
TMEM30B	0.92
USHBP1	0.92
AHRR	0.91
AEN	0.91
CYP51A1-AS1	0.91
DAG1	0.91
DNASE2B	0.91
FMR1	0.91
GNB4	0.91
RPL36A-HNRNPH2	0.91
ITGA1	0.91
ITFG2	0.91
SLC1A6	0.91
SLC16A2	0.91
KRTAP23-1	0.91
LOC100131047	0.91
LOC102723591	0.91
LOC107986160	0.91
LOC105379042	0.91
LYSMD1	0.91
MIR6857	0.91
MLXIP	0.91
MRGPRG-AS1	0.91
NPM2	0.91
NSD1	0.91
OR13D1	0.91
OR7C2	0.91
PAQR6	0.91
PPME1	0.91
PRR34-AS1	0.91
PTPDC1	0.91
SNRNP70	0.91
SPAG11A	0.91
TRAPPC1	0.91
TRMT61B	0.91
WT1	0.91
ZC3H6	0.91
ZMYM3	0.91
ZNF440	0.91
ZNF485	0.91
ADAMTS9-AS2	0.9
AGRN	0.9
C12orf10	0.9
CACNA1F	0.9
CCM2L	0.9
DCUN1D1	0.9
DEFB118	0.9
DHX38	0.9
EHBP1	0.9
HRH2	0.9
RPL35	0.9
SAMD12	0.9
IZUMO1R	0.9
KIAA1024L	0.9
SGMS2	0.9
KRTAP6-2	0.9
LOC100294362	0.9
KRTAP26-1	0.9
SLC16A14	0.9
LOC100129636	0.9
LOC102724687	0.9
LOC105369706	0.9
LOC103021296	0.9
LOC105371566	0.9
LOC107983975	0.9
LOC400794	0.9
MIR4639	0.9
MAGEB4	0.9
MIR6788	0.9
MYLK-AS2	0.9
OR11A1	0.9
OR5K2	0.9
P2RY8	0.9
PLCL2	0.9
PLCD1	0.9
POLR2G	0.9
PRAMEF9	0.9
RASSF1-AS1	0.9
PWWP2A	0.9
RAB3GAP1	0.9
SLC6A1-AS1	0.9
SRR	0.9
TMEM120A	0.9
TMEM255B	0.9
TMEM81	0.9
TNFAIP8L1	0.9
UCK2	0.9
VPS18	0.9
WBP1	0.9
WDR78	0.9
ZNF555	0.9
ZNF622	0.9
ADGRG2	0.89
ARID2	0.89
ASXL2	0.89
AVPI1	0.89
CAST	0.89
CD99L2	0.89
CD3E	0.89
COX7A2	0.89
CUL9	0.89
ELANE	0.89
GLIS3-AS1	0.89
GOLGA7	0.89
GSTM2	0.89
SACM1L	0.89
SEPSECS	0.89
KRT26	0.89
LOC101928543	0.89
LOC105372503	0.89
LOC105378329	0.89
LOC105375724	0.89
NOP53	0.89
PLXNB2	0.89
POLD3	0.89
SLC16A3	0.89
SNAP47	0.89
TEAD4	0.89
TRPM5	0.89
TMEM140	0.89
TMEM68	0.89
UBE2H	0.89
ZNF30	0.89
ZNF416	0.89
ABCG1	0.88
ADAMTS10	0.88
ACSL4	0.88
ALDH8A1	0.88
C9orf139	0.88
DNTTIP2	0.88
FBXL20	0.88
HSD17B3-AS1	0.88
IQGAP1	0.88
KPRP	0.88
KIRREL2	0.88
SLC24A1	0.88
LOC105369565	0.88
LOC107984328	0.88
LZTS3	0.88
NOS1AP	0.88
PJA1	0.88
PANX1	0.88
PCDH9-AS2	0.88
PROK1	0.88
VAMP2	0.88
ZNF717	0.88
ANXA6	0.87
ARSD	0.87
BST1	0.87
CDS2	0.87
CLK4	0.87
CXCL13	0.87
DMPK	0.87
EDEM2	0.87
FAM193B	0.87
FAM167A-AS1	0.87
HIST1H2AC	0.87
S100A14	0.87
KCNG2	0.87
LOC105374328	0.87
LOC105378649	0.87
LOC105374953	0.87
LOX	0.87
MIR4690	0.87
MPHOSPH6	0.87
NAGA	0.87
NBPF15	0.87
OPN5	0.87
PANK1	0.87
PATE2	0.87
PRR27	0.87
SPPL2A	0.87
TBX18	0.87
TIPRL	0.87
TMC8	0.87
USP13	0.87
TPTE	0.87
WDHD1	0.87
XAGE3	0.87
ZNF112	0.87
ZNF341-AS1	0.87
ZNF672	0.87
AGTR2	0.86
BPGM	0.86
BMP5	0.86
CD58	0.86
CMKLR1	0.86
COL1A1	0.86
CCDC34	0.86
EDA	0.86
HES7	0.86
HGS	0.86
INPP5E	0.86
IRF5	0.86
ITGB1BP2	0.86
LDHB	0.86
LOC105373354	0.86
LOC105375688	0.86
LOC112268101	0.86
MIR6798	0.86
MORF4L1	0.86
PJVK	0.86
PDILT	0.86
RHOU	0.86
SLC5A10	0.86
TIFA	0.86
UXS1	0.86
ZNF630	0.86
ARNTL	0.85
ARPC4	0.85
CCR3	0.85
CD38	0.85
COL9A3	0.85
CCNC	0.85
DENND4B	0.85
EIF4EBP1	0.85
FGF16	0.85
FYTTD1	0.85
IRX4	0.85
KCND1	0.85
SLC24A5	0.85
LOC101927053	0.85
MNX1	0.85
MRPL22	0.85
OVCH1	0.85
PAN2	0.85
PLBD1-AS1	0.85
PLLP	0.85
SLC26A11	0.85
TLK1	0.85
TTC8	0.85
ATCAY	0.84
ATP1B1	0.84
CETN3	0.84
CPLX2	0.84
CSPG5	0.84
EFNA2	0.84
L1CAM	0.84
KLHL10	0.84
KRTAP4-12	0.84
LOC107985507	0.84
LOC107986696	0.84
MDM1	0.84
MID2	0.84
NPW	0.84
PNMA6A	0.84
R3HDM4	0.84
SMAD6	0.84
TSGA10IP	0.84
UPK1B	0.84
VIPR2	0.84
YTHDF3	0.84
ZDHHC16	0.84
YPEL2	0.84
ZNF646	0.84
AP2S1	0.83
ARID3B	0.83
CAPG	0.83
CDC73	0.83
CDKN1A	0.83
CHD2	0.83
CHRNB4	0.83
CLCN2	0.83
FAM135A	0.83
FAM19A2	0.83
FBXW2	0.83
FRMD3	0.83
GLRA4	0.83
GRID2	0.83
RSPH3	0.83
RUNX1T1	0.83
RTKN	0.83
KANSL1	0.83
SEC24A	0.83
LIMCH1	0.83
LOC100132215	0.83
LOC101929727	0.83
LOC107983983	0.83
LOC105372629	0.83
LOC105371792	0.83
LOC107984442	0.83
LYSMD3	0.83
MARVELD2	0.83
MIGA1	0.83
MIR6759	0.83
NAA60	0.83
NCAPH	0.83
NUTM2B-AS1	0.83
NXF1	0.83
OR14A2	0.83
OR9Q1	0.83
PHF6	0.83
PLXNB3	0.83
PRKAR1A	0.83
PUM2	0.83
RAP1GAP	0.83
RHOXF1P1	0.83
SLC25A35	0.83
REM1	0.83
SLC25A34-AS1	0.83
SOWAHC	0.83
SPATC1L	0.83
TRA2B	0.83
TXK	0.83
WDR24	0.83
YPEL4	0.83
ADRA1A	0.82
ANLN	0.82
CFTR	0.82
CLEC4D	0.82
ELF1	0.82
FABP4	0.82
FUNDC1	0.82
HELT	0.82
HTR5A-AS1	0.82
SERPINI1	0.82
LOC101927418	0.82
LOC105374310	0.82
LOC105372546	0.82
MRPS11	0.82
MYRFL	0.82
NTF3	0.82
PHC1	0.82
PALM2	0.82
PCYT2	0.82
PEX5L-AS2	0.82
SLC9A4	0.82
SMYD5	0.82
SNX27	0.82
SPATA13	0.82
SPSB3	0.82
TF	0.82
TMEM98	0.82
UNC79	0.82
ADAM21	0.81
B3GALT1	0.81
CCDC183	0.81
CDC42BPG	0.81
ELOVL2	0.81
EML6	0.81
FAM19A4	0.81
RNF213	0.81
RPGR	0.81
LOC100129297	0.81
LOC101928561	0.81
LOC105375131	0.81
LOC107987282	0.81
MAP3K1	0.81
MIR6743	0.81
MEIKIN	0.81
NCOA7	0.81
NIPSNAP3A	0.81
PACRGL	0.81
PKD1P4-NPIPA8	0.81
PCSK1	0.81
PDE1B	0.81
PDIK1L	0.81
PRPS1	0.81
POTEH-AS1	0.81
RAI14	0.81
SLFNL1-AS1	0.81
SYNRG	0.81
TMEM100	0.81
TSPAN7	0.81
UBXN6	0.81
YY2	0.81
ZNF407	0.81
ZNF514	0.81
ALK	0.8
BCORL1	0.8
COASY	0.8
FAM173B	0.8
FANCD2OS	0.8
GPHN	0.8
RNF4	0.8
SERPINA5	0.8
SH3BGRL2	0.8
LOC105369592	0.8
LOC105374076	0.8
LOC105373609	0.8
LOC112267972	0.8
MYOG	0.8
NCK2	0.8
NQO2	0.8
PNMA1	0.8
PXDN	0.8
PRPF3	0.8
SLC17A2	0.8
SPATA9	0.8
TMBIM4	0.8
TRMT11	0.8
TNFRSF1A	0.8
UQCC2	0.8
ZNF256	0.8
AGAP4	0.79
AIG1	0.79
BLOC1S5	0.79
BUB3	0.79
C2orf27B	0.79
CDH10	0.79
COL4A2	0.79
CTAG2	0.79
DIAPH1	0.79
EVC2	0.79
FOXP1	0.79
GPR26	0.79
GPX5	0.79
HIPK2	0.79
HTRA1	0.79
HLA-DRB1	0.79
RUFY1	0.79
SARM1	0.79
INTS4	0.79
KIAA1549L	0.79
KLHL5	0.79
KLHL2	0.79
L3MBTL3	0.79
LOC105376579	0.79
LOC105377938	0.79
LOC107984329	0.79
LPCAT2	0.79
METTL5	0.79
LYST	0.79
MIR4646	0.79
MIR6772	0.79
MT1A	0.79
MVB12B	0.79
MYL2	0.79
MYNN	0.79
NKG7	0.79
NREP	0.79
PLA2G2D	0.79
RMDN3	0.79
SLC32A1	0.79
SLC25A36	0.79
STX17	0.79
SYDE1	0.79
TCP11	0.79
TMEM150A	0.79
UBE2Z	0.79
TPRA1	0.79
VPS41	0.79
A1BG-AS1	0.78
AK2	0.78
ANKEF1	0.78
ARHGAP11B	0.78
ARHGEF3-AS1	0.78
B2M	0.78
BCL2	0.78
CD300A	0.78
CXCR6	0.78
ELOVL1	0.78
GH2	0.78
RORB	0.78
IMPAD1	0.78
2002-09-01	0.78
[truncated: 20,641 more rows]

## Sheet: Set MLPs
GeneSet	MLP
REGULATION_OF_METABOLIC_PROCESS	3.43
REGULATION_OF_CELLULAR_METABOLIC_PROCESS	3.22
ESTABLISHMENT_AND_OR_MAINTENANCE_OF_CELL_POLARITY	3.03
REGULATION_OF_GENE_EXPRESSION	2.85
POSITIVE_REGULATION_OF_BIOLOGICAL_PROCESS	2.78
NUCLEOBASENUCLEOSIDENUCLEOTIDE_AND_NUCLEIC_ACID_METABOLIC_PROCESS	2.76
RECEPTOR_BINDING	2.71
APICAL_PART_OF_CELL	2.56
POSITIVE_REGULATION_OF_CELLULAR_PROCESS	2.49
REGULATION_OF_NUCLEOBASENUCLEOSIDENUCLEOTIDE_AND_NUCLEIC_ACID_METABOLIC_PROCESS	2.46
RESPONSE_TO_UV	2.43
SPECIFIC_TRANSCRIPTIONAL_REPRESSOR_ACTIVITY	2.42
BIOGENIC_AMINE_METABOLIC_PROCESS	2.4
TRANSLATION	2.37
TRANSLATION_INITIATION_FACTOR_ACTIVITY	2.32
REGULATION_OF_TRANSCRIPTION	2.27
SIGNAL_TRANSDUCTION	2.25
CELLULAR_BIOSYNTHETIC_PROCESS	2.25
NUCLEOTIDE_KINASE_ACTIVITY	2.24
PHOSPHOLIPASE_ACTIVITY	2.23
ACTIN_CYTOSKELETON	2.22
POSITIVE_REGULATION_OF_DEVELOPMENTAL_PROCESS	2.16
RESPONSE_TO_ENDOGENOUS_STIMULUS	2.13
REGULATION_OF_TRANSFORMING_GROWTH_FACTOR_BETA_RECEPTOR_SIGNALING_PATHWAY	2.11
ADENYLATE_CYCLASE_ACTIVATION	2.1
REGULATION_OF_CELL_PROLIFERATION	2.1
PEPTIDASE_ACTIVITY	2.09
APICAL_PLASMA_MEMBRANE	2.07
RESPONSE_TO_CARBOHYDRATE_STIMULUS	2.06
NEUROLOGICAL_SYSTEM_PROCESS	2.05
RESPONSE_TO_ABIOTIC_STIMULUS	2.04
NUCLEOTIDE_EXCISION_REPAIR	2.04
OXYGEN_BINDING	2.03
RECEPTOR_ACTIVITY	2.03
NEGATIVE_REGULATION_OF_HYDROLASE_ACTIVITY	2.02
TRANSCRIPTION	2.01
VITAMIN_BINDING	2.01
LYMPHOCYTE_ACTIVATION	2
SYSTEM_PROCESS	1.95
EXOPEPTIDASE_ACTIVITY	1.95
LIPASE_ACTIVITY	1.94
CELL_PROLIFERATION_GO_0008283	1.91
ANTIGEN_BINDING	1.91
CHEMOKINE_ACTIVITY	1.89
NUCLEOTIDE_BIOSYNTHETIC_PROCESS	1.88
LOW_DENSITY_LIPOPROTEIN_BINDING	1.88
TRANSMEMBRANE_RECEPTOR_ACTIVITY	1.86
CELL_DEVELOPMENT	1.85
MAINTENANCE_OF_CELLULAR_LOCALIZATION	1.84
REGULATION_OF_RNA_METABOLIC_PROCESS	1.84
PROGRAMMED_CELL_DEATH	1.83
PLASMA_MEMBRANE	1.82
DOUBLE_STRANDED_RNA_BINDING	1.82
RESPONSE_TO_LIGHT_STIMULUS	1.81
APOPTOSIS_GO	1.8
ACTIVATION_OF_PROTEIN_KINASE_ACTIVITY	1.79
LIPOPROTEIN_BINDING	1.79
INTERCELLULAR_JUNCTION_ASSEMBLY_AND_MAINTENANCE	1.78
TRIACYLGLYCEROL_METABOLIC_PROCESS	1.77
RESPONSE_TO_ORGANIC_SUBSTANCE	1.77
INTERCELLULAR_JUNCTION_ASSEMBLY	1.76
AMINO_ACID_DERIVATIVE_METABOLIC_PROCESS	1.75
G1_S_TRANSITION_OF_MITOTIC_CELL_CYCLE	1.74
CHEMOKINE_RECEPTOR_BINDING	1.73
CYTOKINE_ACTIVITY	1.73
G_PROTEIN_SIGNALING_ADENYLATE_CYCLASE_ACTIVATING_PATHWAY	1.7
G_PROTEIN_COUPLED_RECEPTOR_BINDING	1.7
MEMBRANE	1.69
COVALENT_CHROMATIN_MODIFICATION	1.69
RESPIRATORY_GASEOUS_EXCHANGE	1.69
RESPONSE_TO_RADIATION	1.67
TRANSMEMBRANE_RECEPTOR_PROTEIN_TYROSINE_KINASE_SIGNALING_PATHWAY	1.67
REGULATION_OF_TRANSLATION	1.66
NEGATIVE_REGULATION_OF_GROWTH	1.66
REGULATION_OF_TRANSCRIPTIONDNA_DEPENDENT	1.66
REGULATION_OF_CELLULAR_PROTEIN_METABOLIC_PROCESS	1.66
OXIDOREDUCTASE_ACTIVITY_GO_0016706	1.66
REGULATION_OF_PROTEIN_METABOLIC_PROCESS	1.65
NEGATIVE_REGULATION_OF_METABOLIC_PROCESS	1.64
RESPONSE_TO_DNA_DAMAGE_STIMULUS	1.64
CENTRAL_NERVOUS_SYSTEM_DEVELOPMENT	1.64
HISTONE_MODIFICATION	1.63
GENE_SILENCING	1.63
POSITIVE_REGULATION_OF_CATALYTIC_ACTIVITY	1.62
REGULATION_OF_INTERFERON_GAMMA_BIOSYNTHETIC_PROCESS	1.6
LEUKOCYTE_DIFFERENTIATION	1.6
NUCLEOTIDE_METABOLIC_PROCESS	1.6
NUCLEAR_HORMONE_RECEPTOR_BINDING	1.6
HORMONE_RECEPTOR_BINDING	1.6
REGULATION_OF_GENE_EXPRESSION_EPIGENETIC	1.59
CELL_CELL_SIGNALING	1.58
PHOSPHOLIPASE_C_ACTIVITY	1.58
NERVOUS_SYSTEM_DEVELOPMENT	1.57
POSITIVE_REGULATION_OF_TRANSFERASE_ACTIVITY	1.57
STEROID_HORMONE_RECEPTOR_ACTIVITY	1.57
DNA_HELICASE_ACTIVITY	1.56
NUCLEOBASENUCLEOSIDE_AND_NUCLEOTIDE_METABOLIC_PROCESS	1.55
NEGATIVE_REGULATION_OF_CELL_PROLIFERATION	1.55
ORGANELLE_LOCALIZATION	1.55
TRANSLATION_FACTOR_ACTIVITY_NUCLEIC_ACID_BINDING	1.54
LOCOMOTORY_BEHAVIOR	1.52
FEMALE_GAMETE_GENERATION	1.51
BEHAVIOR	1.51
RNA_POLYMERASE_II_TRANSCRIPTION_FACTOR_ACTIVITY	1.51
NEGATIVE_REGULATION_OF_CELLULAR_PROCESS	1.5
CELLULAR_COMPONENT_ASSEMBLY	1.5
ENZYME_LINKED_RECEPTOR_PROTEIN_SIGNALING_PATHWAY	1.49
CELL_CYCLE_ARREST_GO_0007050	1.49
CARBOXYPEPTIDASE_ACTIVITY	1.49
CARBOHYDRATE_KINASE_ACTIVITY	1.49
PHOSPHOLIPASE_C_ACTIVATION	1.48
REGULATION_OF_DEVELOPMENTAL_PROCESS	1.48
REGULATION_OF_CATABOLIC_PROCESS	1.48
RNA_POLYMERASE_II_TRANSCRIPTION_MEDIATOR_ACTIVITY	1.48
MOLECULAR_ADAPTOR_ACTIVITY	1.48
RNA_BINDING	1.48
LYMPHOCYTE_DIFFERENTIATION	1.47
NEGATIVE_REGULATION_OF_BINDING	1.47
HUMORAL_IMMUNE_RESPONSE	1.47
CELLULAR_DEFENSE_RESPONSE	1.47
MAINTENANCE_OF_PROTEIN_LOCALIZATION	1.47
CYTOPLASM_ORGANIZATION_AND_BIOGENESIS	1.45
CYSTEINE_TYPE_ENDOPEPTIDASE_ACTIVITY	1.45
SYNAPTIC_TRANSMISSION	1.44
CARBOXY_LYASE_ACTIVITY	1.44
THYROID_HORMONE_RECEPTOR_BINDING	1.43
TRANS_GOLGI_NETWORK_TRANSPORT_VESICLE	1.42
DEFENSE_RESPONSE	1.42
MAINTENANCE_OF_LOCALIZATION	1.42
PHOSPHOINOSITIDE_MEDIATED_SIGNALING	1.41
REGULATION_OF_PROGRAMMED_CELL_DEATH	1.41
NEGATIVE_REGULATION_OF_BIOLOGICAL_PROCESS	1.4
TRANSMISSION_OF_NERVE_IMPULSE	1.4
INTRINSIC_TO_MEMBRANE	1.39
NEGATIVE_REGULATION_OF_CELLULAR_METABOLIC_PROCESS	1.39
ESTABLISHMENT_AND_OR_MAINTENANCE_OF_CHROMATIN_ARCHITECTURE	1.39
REGULATION_OF_APOPTOSIS	1.39
MACROMOLECULAR_COMPLEX_ASSEMBLY	1.38
NUCLEAR_TRANSPORT	1.38
SECONDARY_METABOLIC_PROCESS	1.38
RNA_SPLICING_FACTOR_ACTIVITYTRANSESTERIFICATION_MECHANISM	1.38
ENDOPEPTIDASE_ACTIVITY	1.37
AMINE_BIOSYNTHETIC_PROCESS	1.36
INTERFERON_GAMMA_BIOSYNTHETIC_PROCESS	1.36
MEDIATOR_COMPLEX	1.35
MEMBRANE_COAT	1.35
COATED_MEMBRANE	1.35
REGULATION_OF_LIPID_METABOLIC_PROCESS	1.35
INDUCTION_OF_APOPTOSIS_BY_INTRACELLULAR_SIGNALS	1.35
OXIDOREDUCTASE_ACTIVITY_GO_0016705	1.35
PHOSPHORUS_OXYGEN_LYASE_ACTIVITY	1.35
CYCLASE_ACTIVITY	1.35
DETECTION_OF_STIMULUS_INVOLVED_IN_SENSORY_PERCEPTION	1.34
NUCLEOPLASM	1.33
CELL_FRACTION	1.33
T_CELL_ACTIVATION	1.33
NUCLEOCYTOPLASMIC_TRANSPORT	1.33
ANION_CATION_SYMPORTER_ACTIVITY	1.33
N_METHYLTRANSFERASE_ACTIVITY	1.33
GENERAL_RNA_POLYMERASE_II_TRANSCRIPTION_FACTOR_ACTIVITY	1.33
PML_BODY	1.32
RESPONSE_TO_HEAT	1.32
REGULATION_OF_TRANSCRIPTION_FROM_RNA_POLYMERASE_II_PROMOTER	1.32
LEUKOCYTE_ACTIVATION	1.31
CELL_DIVISION	1.31
PHOSPHORIC_DIESTER_HYDROLASE_ACTIVITY	1.31
BRUSH_BORDER	1.29
INTEGRAL_TO_MEMBRANE	1.29
NEGATIVE_REGULATION_OF_CELL_CYCLE	1.29
NEGATIVE_REGULATION_OF_DNA_BINDING	1.29
TRANSLATION_REGULATOR_ACTIVITY	1.29
LIPID_BINDING	1.29
GROWTH	1.27
RESPONSE_TO_TEMPERATURE_STIMULUS	1.27
PHOSPHOTRANSFERASE_ACTIVITY_PHOSPHATE_GROUP_AS_ACCEPTOR	1.27
INTRACELLULAR_SIGNALING_CASCADE	1.26
PIGMENT_METABOLIC_PROCESS	1.25
TASTE_RECEPTOR_ACTIVITY	1.25
PROTEIN_BINDING_BRIDGING	1.25
RIBOSOME	1.24
XENOBIOTIC_METABOLIC_PROCESS	1.24
MAINTENANCE_OF_CELLULAR_PROTEIN_LOCALIZATION	1.24
POSITIVE_REGULATION_OF_CELL_MIGRATION	1.24
HYDROLASE_ACTIVITY_ACTING_ON_ACID_ANHYDRIDESCATALYZING_TRANSMEMBRANE_MOVEMENT_OF_SUBSTANCES	1.24
NUCLEOBASENUCLEOSIDENUCLEOTIDE_KINASE_ACTIVITY	1.24
EPITHELIAL_TO_MESENCHYMAL_TRANSITION	1.23
LIPID_METABOLIC_PROCESS	1.23
NEGATIVE_REGULATION_OF_TRANSCRIPTION	1.23
MAPKKK_CASCADE_GO_0000165	1.23
CYTOPLASMIC_VESICLE_MEMBRANE	1.22
CYTOPLASMIC_VESICLE_PART	1.22
G_PROTEIN_SIGNALING_COUPLED_TO_IP3_SECOND_MESSENGERPHOSPHOLIPASE_C_ACTIVATING	1.22
REGULATION_OF_MOLECULAR_FUNCTION	1.22
CYCLIC_NUCLEOTIDE_METABOLIC_PROCESS	1.22
REGULATION_OF_GROWTH	1.22
ATPASE_ACTIVITY_COUPLED_TO_MOVEMENT_OF_SUBSTANCES	1.22
SOLUBLE_FRACTION	1.21
CELL_SURFACE_RECEPTOR_LINKED_SIGNAL_TRANSDUCTION_GO_0007166	1.21
TRANSCRIPTION_DNA_DEPENDENT	1.21
SENSORY_PERCEPTION	1.21
PHOSPHOLIPID_TRANSPORTER_ACTIVITY	1.21
POSITIVE_REGULATION_OF_TRANSLATION	1.2
POSITIVE_REGULATION_OF_METABOLIC_PROCESS	1.2
AMINO_ACID_AND_DERIVATIVE_METABOLIC_PROCESS	1.2
STEROID_HORMONE_RECEPTOR_SIGNALING_PATHWAY	1.2
ANDROGEN_RECEPTOR_SIGNALING_PATHWAY	1.2
CELL_PROJECTION_PART	1.19
REGIONALIZATION	1.19
RNA_BIOSYNTHETIC_PROCESS	1.19
PROTEIN_RNA_COMPLEX_ASSEMBLY	1.19
PRIMARY_ACTIVE_TRANSMEMBRANE_TRANSPORTER_ACTIVITY	1.19
UBIQUITIN_PROTEIN_LIGASE_ACTIVITY	1.18
VESICULAR_FRACTION	1.17
DNA_METABOLIC_PROCESS	1.17
POSITIVE_REGULATION_OF_CELL_PROLIFERATION	1.17
CYTOKINE_METABOLIC_PROCESS	1.17
MULTICELLULAR_ORGANISMAL_DEVELOPMENT	1.17
IMMUNE_SYSTEM_PROCESS	1.17
METALLOPEPTIDASE_ACTIVITY	1.17
METABOTROPIC_GLUTAMATEGABA_B_LIKE_RECEPTOR_ACTIVITY	1.17
HYDROLASE_ACTIVITY_HYDROLYZING_O_GLYCOSYL_COMPOUNDS	1.17
INTRINSIC_TO_PLASMA_MEMBRANE	1.16
INTERPHASE	1.16
REGULATION_OF_CATALYTIC_ACTIVITY	1.16
DNA_DAMAGE_RESPONSESIGNAL_TRANSDUCTION_RESULTING_IN_INDUCTION_OF_APOPTOSIS	1.16
PROTEIN_METABOLIC_PROCESS	1.16
POSITIVE_REGULATION_OF_CELLULAR_METABOLIC_PROCESS	1.16
CYTOKINE_AND_CHEMOKINE_MEDIATED_SIGNALING_PATHWAY	1.16
RIBONUCLEOPROTEIN_COMPLEX	1.15
BIOSYNTHETIC_PROCESS	1.15
REGULATION_OF_SIGNAL_TRANSDUCTION	1.15
RHYTHMIC_PROCESS	1.15
CELLULAR_RESPONSE_TO_STIMULUS	1.15
DNA_REPAIR	1.14
IMMUNE_RESPONSE	1.14
HETEROCYCLE_METABOLIC_PROCESS	1.14
NEGATIVE_REGULATION_OF_DEVELOPMENTAL_PROCESS	1.14
LIGASE_ACTIVITY	1.14
INTEGRAL_TO_PLASMA_MEMBRANE	1.13
POSITIVE_REGULATION_OF_CYTOKINE_BIOSYNTHETIC_PROCESS	1.13
B_CELL_DIFFERENTIATION	1.13
SECOND_MESSENGER_MEDIATED_SIGNALING	1.13
CHROMATIN_ASSEMBLY	1.12
HYDROLASE_ACTIVITY_ACTING_ON_GLYCOSYL_BONDS	1.12
DNA_BINDING	1.12
HOMOPHILIC_CELL_ADHESION	1.11
PLASMA_MEMBRANE_PART	1.1
REGULATION_OF_T_CELL_ACTIVATION	1.1
TRANSCRIPTION_INITIATION_FROM_RNA_POLYMERASE_II_PROMOTER	1.1
CARBOXYLESTERASE_ACTIVITY	1.1
NEGATIVE_REGULATION_OF_PROTEIN_METABOLIC_PROCESS	1.09
CELLULAR_PROTEIN_METABOLIC_PROCESS	1.09
CELLULAR_LIPID_METABOLIC_PROCESS	1.09
CYTOKINE_BIOSYNTHETIC_PROCESS	1.09
CHROMATIN_MODIFICATION	1.09
SPHINGOLIPID_BIOSYNTHETIC_PROCESS	1.09
REGULATION_OF_CYTOKINE_BIOSYNTHETIC_PROCESS	1.09
HEPARIN_BINDING	1.09
CYTOPLASM	1.08
CELL_SOMA	1.08
OVULATION_CYCLE	1.08
EXTRACELLULAR_SPACE	1.07
DRUG_BINDING	1.07
CHROMATIN_REMODELING_COMPLEX	1.06
PROTEIN_KINASE_CASCADE	1.06
CYTOKINE_PRODUCTION	1.05
B_CELL_ACTIVATION	1.05
PIGMENT_BIOSYNTHETIC_PROCESS	1.05
INOSITOL_OR_PHOSPHATIDYLINOSITOL_PHOSPHODIESTERASE_ACTIVITY	1.05
RNA_POLYMERASE_II_TRANSCRIPTION_FACTOR_ACTIVITYENHANCER_BINDING	1.05
SMALL_CONJUGATING_PROTEIN_LIGASE_ACTIVITY	1.05
SERINE_TYPE_ENDOPEPTIDASE_ACTIVITY	1.05
SPLICEOSOME	1.04
RNA_METABOLIC_PROCESS	1.04
POSITIVE_REGULATION_OF_CELLULAR_PROTEIN_METABOLIC_PROCESS	1.04
PROTEASOME_COMPLEX	1.03
RESPONSE_TO_XENOBIOTIC_STIMULUS	1.03
INTRACELLULAR_RECEPTOR_MEDIATED_SIGNALING_PATHWAY	1.03
REGULATION_OF_LYMPHOCYTE_ACTIVATION	1.03
INOSITOL_OR_PHOSPHATIDYLINOSITOL_PHOSPHATASE_ACTIVITY	1.03
HORMONE_ACTIVITY	1.03
SH3_SH2_ADAPTOR_ACTIVITY	1.03
VESICLE_MEMBRANE	1.02
SYSTEM_DEVELOPMENT	1.02
NEGATIVE_REGULATION_OF_PROGRAMMED_CELL_DEATH	1.02
NEGATIVE_REGULATION_OF_NUCLEOBASENUCLEOSIDENUCLEOTIDE_AND_NUCLEIC_ACID_METABOLIC_PROCESS	1.01
INSULIN_RECEPTOR_SIGNALING_PATHWAY	1.01
STEROID_METABOLIC_PROCESS	1.01
REGULATION_OF_PROTEIN_POLYMERIZATION	1.01
INTEGRAL_TO_GOLGI_MEMBRANE	1
NUCLEAR_LUMEN	1
REGULATION_OF_JAK_STAT_CASCADE	1
CELLULAR_MACROMOLECULE_METABOLIC_PROCESS	1
SYMPORTER_ACTIVITY	1
NEGATIVE_REGULATION_OF_APOPTOSIS	0.99
PROTEIN_DNA_COMPLEX_ASSEMBLY	0.99
RIBONUCLEOPROTEIN_COMPLEX_BIOGENESIS_AND_ASSEMBLY	0.99
VITAMIN_METABOLIC_PROCESS	0.99
HEME_METABOLIC_PROCESS	0.99
SMALL_PROTEIN_CONJUGATING_ENZYME_ACTIVITY	0.99
PURINE_NUCLEOTIDE_METABOLIC_PROCESS	0.98
TRANSCRIPTION_INITIATION	0.98
REGULATION_OF_RESPONSE_TO_EXTERNAL_STIMULUS	0.97
MONOCARBOXYLIC_ACID_TRANSPORT	0.97
LYASE_ACTIVITY	0.97
GTPASE_ACTIVATOR_ACTIVITY	0.97
VESICLE_COAT	0.96
NUCLEAR_IMPORT	0.96
PROTEIN_MODIFICATION_BY_SMALL_PROTEIN_CONJUGATION	0.96
PROTEIN_UBIQUITINATION	0.96
KERATINOCYTE_DIFFERENTIATION	0.96
ESTABLISHMENT_OF_VESICLE_LOCALIZATION	0.96
INTERFERON_GAMMA_PRODUCTION	0.96
CELL_FATE_COMMITMENT	0.96
LIGASE_ACTIVITY_FORMING_CARBON_NITROGEN_BONDS	0.96
MICROSOME	0.95
RESPONSE_TO_NUTRIENT_LEVELS	0.95
REGULATION_OF_ACTIN_POLYMERIZATION_AND_OR_DEPOLYMERIZATION	0.95
TRANSFORMING_GROWTH_FACTOR_BETA_RECEPTOR_SIGNALING_PATHWAY	0.95
POSITIVE_REGULATION_OF_PROTEIN_METABOLIC_PROCESS	0.95
PROTEIN_METHYLTRANSFERASE_ACTIVITY	0.95
STRUCTURAL_CONSTITUENT_OF_RIBOSOME	0.95
TRANSCRIPTION_FACTOR_ACTIVITY	0.95
SARCOMERE	0.94
CYTOKINESIS	0.94
MYELOID_LEUKOCYTE_DIFFERENTIATION	0.94
ACTIN_CYTOSKELETON_ORGANIZATION_AND_BIOGENESIS	0.94
PROTEIN_PHOSPHATASE_TYPE_2A_REGULATOR_ACTIVITY	0.94
TRANSCRIPTION_ACTIVATOR_ACTIVITY	0.94
ENDONUCLEASE_ACTIVITY_GO_0016893	0.94
G_PROTEIN_COUPLED_RECEPTOR_ACTIVITY	0.93
ORGANELLE_LUMEN	0.92
MEMBRANE_ENCLOSED_LUMEN	0.92
GOLGI_ASSOCIATED_VESICLE	0.92
RESPONSE_TO_CHEMICAL_STIMULUS	0.92
POSITIVE_REGULATION_OF_DNA_METABOLIC_PROCESS	0.92
CHROMATIN_ASSEMBLY_OR_DISASSEMBLY	0.92
ATPASE_ACTIVITY_COUPLED_TO_TRANSMEMBRANE_MOVEMENT_OF_IONS_PHOSPHORYLATIVE_MECHANISM	0.92
DOUBLE_STRANDED_DNA_BINDING	0.92
INTRACELLULAR_PROTEIN_TRANSPORT	0.91
G_PROTEIN_SIGNALING_COUPLED_TO_CAMP_NUCLEOTIDE_SECOND_MESSENGER	0.91
RECEPTOR_MEDIATED_ENDOCYTOSIS	0.91
POSITIVE_REGULATION_OF_MAPKKK_CASCADE	0.91
PDZ_DOMAIN_BINDING	0.91
AMINOPEPTIDASE_ACTIVITY	0.91
NEGATIVE_REGULATION_OF_PHOSPHORYLATION	0.9
REGULATED_SECRETORY_PATHWAY	0.9
MITOTIC_SPINDLE_ORGANIZATION_AND_BIOGENESIS	0.9
NITROGEN_COMPOUND_BIOSYNTHETIC_PROCESS	0.9
NEGATIVE_REGULATION_OF_PHOSPHATE_METABOLIC_PROCESS	0.9
SH3_DOMAIN_BINDING	0.9
CARBON_CARBON_LYASE_ACTIVITY	0.9
ACTIN_FILAMENT	0.89
PROTEOLYSIS	0.89
NEGATIVE_REGULATION_OF_RNA_METABOLIC_PROCESS	0.89
PROTEIN_KINASE_INHIBITOR_ACTIVITY	0.89
ENZYME_BINDING	0.89
NUCLEAR_PART	0.88
MACROMOLECULAR_COMPLEX	0.88
ESTABLISHMENT_OF_ORGANELLE_LOCALIZATION	0.88
NEUROGENESIS	0.88
AMYLOID_PRECURSOR_PROTEIN_METABOLIC_PROCESS	0.88
HISTONE_METHYLTRANSFERASE_ACTIVITY	0.88
PROTEIN_DEACETYLASE_ACTIVITY	0.88
TRANSFERASE_ACTIVITY_TRANSFERRING_PENTOSYL_GROUPS	0.88
NEGATIVE_REGULATION_OF_CELLULAR_PROTEIN_METABOLIC_PROCESS	0.87
TRANSLATIONAL_INITIATION	0.87
TRANSCRIPTION_FROM_RNA_POLYMERASE_II_PROMOTER	0.87
ACTIN_FILAMENT_BINDING	0.87
STRUCTURE_SPECIFIC_DNA_BINDING	0.87
TRANSITION_METAL_ION_TRANSMEMBRANE_TRANSPORTER_ACTIVITY	0.87
PROTEIN_FOLDING	0.86
CELL_ACTIVATION	0.86
REGULATION_OF_PROTEIN_KINASE_ACTIVITY	0.86
REGULATION_OF_HEART_CONTRACTION	0.86
CERAMIDE_METABOLIC_PROCESS	0.86
REGULATION_OF_MULTICELLULAR_ORGANISMAL_PROCESS	0.86
INSULIN_LIKE_GROWTH_FACTOR_RECEPTOR_BINDING	0.86
ENDORIBONUCLEASE_ACTIVITY	0.86
NUCLEOBASENUCLEOSIDENUCLEOTIDE_AND_NUCLEIC_ACID_TRANSMEMBRANE_TRANSPORTER_ACTIVITY	0.86
MEMBRANE_PART	0.85
ER_GOLGI_INTERMEDIATE_COMPARTMENT	0.85
PATTERN_SPECIFICATION_PROCESS	0.85
RESPONSE_TO_EXTRACELLULAR_STIMULUS	0.85
NEGATIVE_REGULATION_OF_TRANSCRIPTION_DNA_DEPENDENT	0.85
PROTEIN_IMPORT_INTO_NUCLEUS	0.85
ACTIVE_TRANSMEMBRANE_TRANSPORTER_ACTIVITY	0.85
GLUTAMATE_RECEPTOR_ACTIVITY	0.85
GATED_CHANNEL_ACTIVITY	0.85
NF_KAPPAB_BINDING	0.85
VESICLE_LOCALIZATION	0.84
NEURON_DIFFERENTIATION	0.84
RESPONSE_TO_HORMONE_STIMULUS	0.84
INTERPHASE_OF_MITOTIC_CELL_CYCLE	0.84
CAMP_MEDIATED_SIGNALING	0.84
ACID_AMINO_ACID_LIGASE_ACTIVITY	0.84
MONOCARBOXYLIC_ACID_TRANSMEMBRANE_TRANSPORTER_ACTIVITY	0.84
METALLOEXOPEPTIDASE_ACTIVITY	0.84
ION_TRANSMEMBRANE_TRANSPORTER_ACTIVITY	0.84
COATED_VESICLE_MEMBRANE	0.83
RESPONSE_TO_STRESS	0.83
AMINO_ACID_DERIVATIVE_BIOSYNTHETIC_PROCESS	0.83
POSITIVE_REGULATION_OF_EPITHELIAL_CELL_PROLIFERATION	0.83
CALMODULIN_BINDING	0.83
CHROMATIN	0.82
ESTABLISHMENT_OF_PROTEIN_LOCALIZATION	0.82
MEMBRANE_LIPID_METABOLIC_PROCESS	0.82
SENSORY_PERCEPTION_OF_TASTE	0.82
T_CELL_DIFFERENTIATION	0.82
CELL_RECOGNITION	0.82
RNA_SPLICING	0.82
HELICASE_ACTIVITY	0.82
NUCLEOSIDE_TRIPHOSPHATASE_ACTIVITY	0.82
ATPASE_ACTIVITY_COUPLED_TO_TRANSMEMBRANE_MOVEMENT_OF_IONS	0.82
OXIDOREDUCTASE_ACTIVITY_ACTING_ON_THE_ALDEHYDE_OR_OXO_GROUP_OF_DONORS	0.82
TRANSPORT_VESICLE	0.81
MEMBRANE_FRACTION	0.81
HYDROLASE_ACTIVITY_ACTING_ON_ACID_ANHYDRIDES	0.81
ELECTRON_CARRIER_ACTIVITY	0.81
TRANSCRIPTION_COACTIVATOR_ACTIVITY	0.81
PHOSPHATASE_REGULATOR_ACTIVITY	0.81
PYROPHOSPHATASE_ACTIVITY	0.81
REGULATION_OF_TYROSINE_PHOSPHORYLATION_OF_STAT_PROTEIN	0.8
CELLULAR_LOCALIZATION	0.8
N_ACYLTRANSFERASE_ACTIVITY	0.8
PROTEIN_KINASE_REGULATOR_ACTIVITY	0.8
GOLGI_MEMBRANE	0.79
NUCLEAR_CHROMATIN	0.79
ACTIN_FILAMENT_BASED_PROCESS	0.79
DETECTION_OF_STIMULUS	0.79
ANATOMICAL_STRUCTURE_DEVELOPMENT	0.79
REGULATION_OF_CELL_GROWTH	0.79
SEROTONIN_RECEPTOR_ACTIVITY	0.79
GTPASE_REGULATOR_ACTIVITY	0.79
KINASE_INHIBITOR_ACTIVITY	0.79
DEACETYLASE_ACTIVITY	0.79
PROTEIN_HETERODIMERIZATION_ACTIVITY	0.79
CORTICAL_ACTIN_CYTOSKELETON	0.78
POSITIVE_REGULATION_OF_NUCLEOBASENUCLEOSIDENUCLEOTIDE_AND_NUCLEIC_ACID_METABOLIC_PROCESS	0.78
CIRCADIAN_RHYTHM	0.78
GLAND_DEVELOPMENT	0.78
REGULATION_OF_PROTEIN_IMPORT_INTO_NUCLEUS	0.78
ENZYME_REGULATOR_ACTIVITY	0.78
STEROID_HORMONE_RECEPTOR_BINDING	0.78
REGULATION_OF_KINASE_ACTIVITY	0.77
BIOPOLYMER_METABOLIC_PROCESS	0.77
T_CELL_PROLIFERATION	0.77
POSITIVE_REGULATION_OF_RNA_METABOLIC_PROCESS	0.77
HEME_BIOSYNTHETIC_PROCESS	0.77
SERINE_TYPE_PEPTIDASE_ACTIVITY	0.77
CYTOCHROME_C_OXIDASE_ACTIVITY	0.77
CASPASE_REGULATOR_ACTIVITY	0.77
MEMBRANE_LIPID_BIOSYNTHETIC_PROCESS	0.76
ENDOTHELIAL_CELL_PROLIFERATION	0.76
SODIUM_ION_TRANSPORT	0.76
GLIOGENESIS	0.76
PROTEIN_AMINO_ACID_ADP_RIBOSYLATION	0.76
SUBSTRATE_SPECIFIC_TRANSPORTER_ACTIVITY	0.76
VOLTAGE_GATED_POTASSIUM_CHANNEL_COMPLEX	0.75
TRANS_GOLGI_NETWORK	0.75
DETECTION_OF_ABIOTIC_STIMULUS	0.75
REGULATION_OF_TRANSFERASE_ACTIVITY	0.75
REGULATION_OF_ACTIN_FILAMENT_LENGTH	0.75
POSITIVE_REGULATION_OF_MAP_KINASE_ACTIVITY	0.75
DNA_DAMAGE_CHECKPOINT	0.75
CHEMICAL_HOMEOSTASIS	0.75
REGULATION_OF_IMMUNE_SYSTEM_PROCESS	0.75
SPINDLE_ORGANIZATION_AND_BIOGENESIS	0.75
HYDROLASE_ACTIVITY_ACTING_ON_ESTER_BONDS	0.75
PHOSPHOLIPASE_A2_ACTIVITY	0.75
CELL_CORTEX_PART	0.74
REGULATION_OF_DEFENSE_RESPONSE	0.74
GLYCOPROTEIN_CATABOLIC_PROCESS	0.74
NEGATIVE_REGULATION_OF_ANGIOGENESIS	0.74
DNA_DAMAGE_RESPONSESIGNAL_TRANSDUCTION	0.74
TRANSCRIPTION_FROM_RNA_POLYMERASE_III_PROMOTER	0.74
SODIUM_CHANNEL_ACTIVITY	0.74
TRANSMEMBRANE_TRANSPORTER_ACTIVITY	0.74
NUCLEAR_ENVELOPE	0.73
NEGATIVE_REGULATION_OF_INTRACELLULAR_TRANSPORT	0.73
MACROMOLECULE_LOCALIZATION	0.73
CELL_PROJECTION_BIOGENESIS	0.73
PROTEIN_LOCALIZATION	0.73
REGULATION_OF_BINDING	0.73
MONOSACCHARIDE_BINDING	0.73
ENDONUCLEASE_ACTIVITY	0.73
INTRINSIC_TO_ORGANELLE_MEMBRANE	0.72
POSITIVE_REGULATION_OF_RESPONSE_TO_STIMULUS	0.72
ENDODEOXYRIBONUCLEASE_ACTIVITY	0.72
SUBSTRATE_SPECIFIC_TRANSMEMBRANE_TRANSPORTER_ACTIVITY	0.72
CYSTEINE_TYPE_PEPTIDASE_ACTIVITY	0.72
CYCLIC_NUCLEOTIDE_PHOSPHODIESTERASE_ACTIVITY	0.72
GROWTH_FACTOR_BINDING	0.72
MYOFIBRIL	0.71
REGULATION_OF_HYDROLASE_ACTIVITY	0.71
REGULATION_OF_CELL_MORPHOGENESIS	0.71
PHOSPHORIC_ESTER_HYDROLASE_ACTIVITY	0.71
ATP_DEPENDENT_DNA_HELICASE_ACTIVITY	0.71
STEROID_BINDING	0.71
GTPASE_BINDING	0.71
TRANSFERASE_ACTIVITY_TRANSFERRING_GROUPS_OTHER_THAN_AMINO_ACYL_GROUPS	0.71
EUKARYOTIC_TRANSLATION_INITIATION_FACTOR_3_COMPLEX	0.7
INTEGRAL_TO_ORGANELLE_MEMBRANE	0.7
POSITIVE_REGULATION_OF_SIGNAL_TRANSDUCTION	0.7
PHOTOTRANSDUCTION	0.7
SEXUAL_REPRODUCTION	0.7
EPIDERMAL_GROWTH_FACTOR_RECEPTOR_SIGNALING_PATHWAY	0.7
RESPONSE_TO_EXTERNAL_STIMULUS	0.7
SPHINGOID_METABOLIC_PROCESS	0.7
PROTEIN_DOMAIN_SPECIFIC_BINDING	0.7
EARLY_ENDOSOME	0.69
ONE_CARBON_COMPOUND_METABOLIC_PROCESS	0.69
HORMONE_SECRETION	0.69
POSITIVE_REGULATION_OF_MULTICELLULAR_ORGANISMAL_PROCESS	0.69
MEMBRANE_ORGANIZATION_AND_BIOGENESIS	0.69
REGULATION_OF_CYTOKINE_PRODUCTION	0.69
BONE_REMODELING	0.69
AMINE_METABOLIC_PROCESS	0.69
CELL_CYCLE_GO_0007049	0.69
CATION_TRANSMEMBRANE_TRANSPORTER_ACTIVITY	0.69
KINASE_BINDING	0.69
KINASE_REGULATOR_ACTIVITY	0.69
MONOOXYGENASE_ACTIVITY	0.69
ACTIN_BINDING	0.69
GTPASE_ACTIVITY	0.69
CONTRACTILE_FIBER	0.68
NUCLEUS	0.68
DNA_INTEGRITY_CHECKPOINT	0.68
REGULATION_OF_ANGIOGENESIS	0.68
PHOSPHOLIPID_BINDING	0.68
SERINE_HYDROLASE_ACTIVITY	0.68
LIPID_TRANSPORTER_ACTIVITY	0.68
NUCLEOPLASM_PART	0.67
GLUTAMINE_FAMILY_AMINO_ACID_METABOLIC_PROCESS	0.67
TRANSMEMBRANE_RECEPTOR_PROTEIN_SERINE_THREONINE_KINASE_SIGNALING_PATHWAY	0.67
RHO_PROTEIN_SIGNAL_TRANSDUCTION	0.67
MAP_KINASE_ACTIVITY	0.67
SINGLE_STRANDED_DNA_BINDING	0.67
PROTEIN_C_TERMINUS_BINDING	0.67
INORGANIC_CATION_TRANSMEMBRANE_TRANSPORTER_ACTIVITY	0.67
LAMELLIPODIUM	0.66
EXTRACELLULAR_REGION_PART	0.66
TISSUE_DEVELOPMENT	0.66
INTERLEUKIN_8_BIOSYNTHETIC_PROCESS	0.66
NUCLEOSOME_ASSEMBLY	0.66
REGULATION_OF_T_CELL_PROLIFERATION	0.66
RHODOPSIN_LIKE_RECEPTOR_ACTIVITY	0.66
ORGANIC_ACID_TRANSMEMBRANE_TRANSPORTER_ACTIVITY	0.66
NUCLEAR_MEMBRANE	0.65
INTRINSIC_TO_GOLGI_MEMBRANE	0.65
NUCLEAR_CHROMOSOME_PART	0.65
LIPID_CATABOLIC_PROCESS	0.65
DEVELOPMENTAL_MATURATION	0.65
GENERATION_OF_NEURONS	0.65
COAGULATION	0.65
PROTEIN_TRANSPORT	0.65
PROTEIN_COMPLEX_BINDING	0.65
CHROMOSOMAL_PART	0.64
POSITIVE_REGULATION_OF_TRANSCRIPTIONDNA_DEPENDENT	0.64
PROTEIN_MATURATION	0.64
GAMETE_GENERATION	0.64
SKELETAL_DEVELOPMENT	0.64
CELL_CYCLE_PHASE	0.64
HORMONE_METABOLIC_PROCESS	0.64
TYROSINE_PHOSPHORYLATION_OF_STAT_PROTEIN	0.64
NEGATIVE_REGULATION_OF_BIOSYNTHETIC_PROCESS	0.64
HISTONE_DEACETYLASE_BINDING	0.64
VOLTAGE_GATED_SODIUM_CHANNEL_ACTIVITY	0.64
PATTERN_BINDING	0.64
PROTEIN_DIMERIZATION_ACTIVITY	0.64
EXTERNAL_SIDE_OF_PLASMA_MEMBRANE	0.63
CELL_PROJECTION	0.63
TRANSCRIPTION_FACTOR_COMPLEX	0.63
SENSORY_PERCEPTION_OF_CHEMICAL_STIMULUS	0.63
REGULATION_OF_ENDOTHELIAL_CELL_PROLIFERATION	0.63
S_ADENOSYLMETHIONINE_DEPENDENT_METHYLTRANSFERASE_ACTIVITY	0.63
PROTEIN_KINASE_BINDING	0.63
HYDROGEN_ION_TRANSMEMBRANE_TRANSPORTER_ACTIVITY	0.63
REGULATION_OF_DNA_BINDING	0.62
POSITIVE_REGULATION_OF_T_CELL_ACTIVATION	0.62
REGULATION_OF_CELLULAR_COMPONENT_SIZE	0.62
REGULATION_OF_CELL_CELL_ADHESION	0.62
NEGATIVE_REGULATION_OF_TRANSCRIPTION_FACTOR_ACTIVITY	0.62
TISSUE_REMODELING	0.62
OXIDOREDUCTASE_ACTIVITY	0.62
TRANSCRIPTION_REPRESSOR_ACTIVITY	0.62
VOLTAGE_GATED_CALCIUM_CHANNEL_COMPLEX	0.61
ENDOMEMBRANE_SYSTEM	0.61
MYOSIN_COMPLEX	0.61
PROTEIN_TARGETING	0.61
DNA_REPLICATION	0.61
NEGATIVE_REGULATION_OF_SIGNAL_TRANSDUCTION	0.61
CHROMOSOME_ORGANIZATION_AND_BIOGENESIS	0.61
REGULATION_OF_MEMBRANE_POTENTIAL	0.61
DI___TRI_VALENT_INORGANIC_CATION_TRANSMEMBRANE_TRANSPORTER_ACTIVITY	0.61
OXIDOREDUCTASE_ACTIVITY_ACTING_ON_NADH_OR_NADPH	0.61
HYDROLASE_ACTIVITY_ACTING_ON_CARBON_NITROGEN_NOT_PEPTIDEBONDSIN_LINEAR_AMIDES	0.61
RESPONSE_TO_NUTRIENT	0.6
PURINE_RIBONUCLEOTIDE_METABOLIC_PROCESS	0.6
ANTI_APOPTOSIS	0.6
PROTEIN_COMPLEX_ASSEMBLY	0.6
SMAD_BINDING	0.6
ANCHORED_TO_MEMBRANE	0.59
ANCHORED_TO_PLASMA_MEMBRANE	0.59
COFACTOR_CATABOLIC_PROCESS	0.59
POSITIVE_REGULATION_OF_I_KAPPAB_KINASE_NF_KAPPAB_CASCADE	0.59
S_PHASE	0.59
NUCLEOTIDE_SUGAR_METABOLIC_PROCESS	0.59
PHOSPHOLIPID_METABOLIC_PROCESS	0.59
CELL_MATURATION	0.59
POLYSACCHARIDE_BINDING	0.59
LIGAND_GATED_CHANNEL_ACTIVITY	0.59
SMALL_GTPASE_BINDING	0.59
DNA_DEPENDENT_ATPASE_ACTIVITY	0.59
GROWTH_FACTOR_ACTIVITY	0.59
PROTEIN_COMPLEX	0.58
FEMALE_PREGNANCY	0.58
COFACTOR_METABOLIC_PROCESS	0.58
REGULATION_OF_TRANSLATIONAL_INITIATION	0.58
CELL_CYCLE_PROCESS	0.58
PROTEIN_SECRETION	0.58
POSITIVE_REGULATION_OF_LYMPHOCYTE_ACTIVATION	0.58
UBIQUITIN_CYCLE	0.58
ENZYME_INHIBITOR_ACTIVITY	0.58
ACETYLCHOLINE_BINDING	0.58
OXIDOREDUCTASE_ACTIVITY_ACTING_ON_THE_ALDEHYDE_OR_OXO_GROUP_OF_DONORSNAD_OR_NADP_AS_ACCEPTOR	0.58
RIBONUCLEOPROTEIN_BINDING	0.58
REPRODUCTIVE_PROCESS	0.57
REGULATION_OF_G_PROTEIN_COUPLED_RECEPTOR_PROTEIN_SIGNALING_PATHWAY	0.57
BIOPOLYMER_BIOSYNTHETIC_PROCESS	0.57
GENERATION_OF_A_SIGNAL_INVOLVED_IN_CELL_CELL_SIGNALING	0.57
EXOCYTOSIS	0.57
AROMATIC_COMPOUND_METABOLIC_PROCESS	0.57
COFACTOR_TRANSPORTER_ACTIVITY	0.57
ATPASE_ACTIVITY_COUPLED	0.57
INTRACELLULAR_ORGANELLE_PART	0.56
REGULATION_OF_HORMONE_SECRETION	0.56
NITROGEN_COMPOUND_METABOLIC_PROCESS	0.56
INTERLEUKIN_8_PRODUCTION	0.56
DETECTION_OF_EXTERNAL_STIMULUS	0.56
REPRODUCTION	0.56
VOLTAGE_GATED_CALCIUM_CHANNEL_ACTIVITY	0.56
TRANSMEMBRANE_RECEPTOR_PROTEIN_PHOSPHATASE_ACTIVITY	0.56
ATPASE_ACTIVITY	0.56
INOSITOL_OR_PHOSPHATIDYLINOSITOL_KINASE_ACTIVITY	0.56
CYTOSKELETON	0.55
SPHINGOLIPID_METABOLIC_PROCESS	0.55
ACTIVATION_OF_MAPK_ACTIVITY	0.55
BLOOD_COAGULATION	0.55
POSITIVE_REGULATION_OF_CELLULAR_COMPONENT_ORGANIZATION_AND_BIOGENESIS	0.55
NEGATIVE_REGULATION_OF_CYTOKINE_BIOSYNTHETIC_PROCESS	0.55
KINASE_ACTIVITY	0.55
RHO_GUANYL_NUCLEOTIDE_EXCHANGE_FACTOR_ACTIVITY	0.55
GLYCOSAMINOGLYCAN_BINDING	0.55
CONTRACTILE_FIBER_PART	0.54
ESTABLISHMENT_OF_CELLULAR_LOCALIZATION	0.54
MITOTIC_CELL_CYCLE	0.54
JNK_CASCADE	0.54
CYTOSKELETON_ORGANIZATION_AND_BIOGENESIS	0.54
POSITIVE_REGULATION_OF_TRANSCRIPTION	0.54
CATION_TRANSPORTING_ATPASE_ACTIVITY	0.54
ANION_CHANNEL_ACTIVITY	0.54
CHLORIDE_CHANNEL_ACTIVITY	0.54
REGULATION_OF_BIOLOGICAL_QUALITY	0.53
REGULATION_OF_JNK_CASCADE	0.53
MICROTUBULE_ORGANIZING_CENTER_ORGANIZATION_AND_BIOGENESIS	0.53
RIBONUCLEOTIDE_METABOLIC_PROCESS	0.53
REGULATION_OF_RESPONSE_TO_STIMULUS	0.53
NEGATIVE_REGULATION_OF_MYELOID_CELL_DIFFERENTIATION	0.53
RIBOSOME_BIOGENESIS_AND_ASSEMBLY	0.53
LIPID_KINASE_ACTIVITY	0.53
DNA_DIRECTED_RNA_POLYMERASEII_HOLOENZYME	0.52
PROTEIN_POLYUBIQUITINATION	0.52
POSITIVE_REGULATION_OF_TRANSCRIPTION_FROM_RNA_POLYMERASE_II_PROMOTER	0.52
NUCLEOBASENUCLEOSIDENUCLEOTIDE_AND_NUCLEIC_ACID_TRANSPORT	0.52
MACROMOLECULE_BIOSYNTHETIC_PROCESS	0.52
CELLULAR_RESPONSE_TO_EXTRACELLULAR_STIMULUS	0.52
ENDOTHELIAL_CELL_MIGRATION	0.52
REGULATION_OF_PROTEIN_STABILITY	0.52
RRNA_METABOLIC_PROCESS	0.52
HEMATOPOIETIN_INTERFERON_CLASSD200_DOMAIN_CYTOKINE_RECEPTOR_BINDING	0.52
CHROMOSOMEPERICENTRIC_REGION	0.51
MITOCHONDRIAL_MATRIX	0.51
MITOCHONDRIAL_LUMEN	0.51
REPLICATION_FORK	0.51
INDUCTION_OF_APOPTOSIS_BY_EXTRACELLULAR_SIGNALS	0.51
PROTEIN_IMPORT	0.51
CELLULAR_PROTEIN_COMPLEX_DISASSEMBLY	0.51
NEGATIVE_REGULATION_OF_TRANSCRIPTION_FROM_RNA_POLYMERASE_II_PROMOTER	0.51
ION_CHANNEL_ACTIVITY	0.51
METALLOENDOPEPTIDASE_ACTIVITY	0.51
ORGANELLE_PART	0.5
NADH_DEHYDROGENASE_COMPLEX	0.5
MITOCHONDRIAL_RESPIRATORY_CHAIN_COMPLEX_I	0.5
RESPIRATORY_CHAIN_COMPLEX_I	0.5
CONDENSED_CHROMOSOME	0.5
MULTI_ORGANISM_PROCESS	0.5
ORGANELLE_ORGANIZATION_AND_BIOGENESIS	0.5
LIPID_HOMEOSTASIS	0.5
CELLULAR_LIPID_CATABOLIC_PROCESS	0.5
EPIDERMIS_DEVELOPMENT	0.5
INACTIVATION_OF_MAPK_ACTIVITY	0.5
MACROMOLECULAR_COMPLEX_DISASSEMBLY	0.5
DNA_MODIFICATION	0.5
STRESS_ACTIVATED_PROTEIN_KINASE_SIGNALING_PATHWAY	0.5
SOLUTE_SODIUM_SYMPORTER_ACTIVITY	0.5
TELOMERIC_DNA_BINDING	0.5
OLIGOSACCHARYL_TRANSFERASE_COMPLEX	0.49
PEROXISOMAL_PART	0.49
SPINDLE_MICROTUBULE	0.49
MICROBODY_PART	0.49
REGULATION_OF_MAPKKK_CASCADE	0.49
REGULATION_OF_DNA_METABOLIC_PROCESS	0.49
ACTIN_POLYMERIZATION_AND_OR_DEPOLYMERIZATION	0.49
GTP_BINDING	0.49
SPECIFIC_RNA_POLYMERASE_II_TRANSCRIPTION_FACTOR_ACTIVITY	0.49
TRANSCRIPTION_ELONGATION_REGULATOR_ACTIVITY	0.49
INTRINSIC_TO_ENDOPLASMIC_RETICULUM_MEMBRANE	0.48
PEROXISOMAL_MEMBRANE	0.48
EXTRACELLULAR_REGION	0.48
INTEGRAL_TO_ENDOPLASMIC_RETICULUM_MEMBRANE	0.48
NON_MEMBRANE_BOUND_ORGANELLE	0.48
GOLGI_APPARATUS_PART	0.48
MICROBODY_MEMBRANE	0.48
INTRACELLULAR_NON_MEMBRANE_BOUND_ORGANELLE	0.48
TRANSCRIPTION_FACTOR_TFIID_COMPLEX	0.48
POSITIVE_REGULATION_OF_IMMUNE_SYSTEM_PROCESS	0.48
REGULATION_OF_ANATOMICAL_STRUCTURE_MORPHOGENESIS	0.48
MEIOSIS_I	0.48
REGULATION_OF_CELL_MIGRATION	0.48
HEMOPOIESIS	0.48
POSITIVE_REGULATION_OF_T_CELL_PROLIFERATION	0.48
PROTEIN_TARGETING_TO_MEMBRANE	0.48
REGULATION_OF_CYCLIN_DEPENDENT_PROTEIN_KINASE_ACTIVITY	0.48
G_PROTEIN_SIGNALING_COUPLED_TO_CYCLIC_NUCLEOTIDE_SECOND_MESSENGER	0.48
POSITIVE_REGULATION_OF_CYTOSKELETON_ORGANIZATION_AND_BIOGENESIS	0.48
DEVELOPMENTAL_GROWTH	0.48
ION_HOMEOSTASIS	0.48
POSITIVE_REGULATION_OF_ANGIOGENESIS	0.48
TRANSFERASE_ACTIVITY_TRANSFERRING_ACYL_GROUPS	0.48
RAS_GTPASE_ACTIVATOR_ACTIVITY	0.48
RAS_GTPASE_BINDING	0.48
MICROTUBULE_MOTOR_ACTIVITY	0.48
CHROMATIN_BINDING	0.48
NUCLEAR_REPLICATION_FORK	0.47
LATE_ENDOSOME	0.47
CELL_CORTEX	0.47
HEMOSTASIS	0.47
JAK_STAT_CASCADE	0.47
POSITIVE_REGULATION_OF_DEFENSE_RESPONSE	0.47
ACTIN_FILAMENT_POLYMERIZATION	0.47
WOUND_HEALING	0.47
RESPONSE_TO_IONIZING_RADIATION	0.47
NITROGEN_COMPOUND_CATABOLIC_PROCESS	0.47
COFACTOR_BINDING	0.47
STRUCTURAL_MOLECULE_ACTIVITY	0.47
MONOVALENT_INORGANIC_CATION_TRANSMEMBRANE_TRANSPORTER_ACTIVITY	0.47
SECRETORY_GRANULE	0.46
I_KAPPAB_KINASE_NF_KAPPAB_CASCADE	0.46
PROTEIN_COMPLEX_DISASSEMBLY	0.46
TRANSITION_METAL_ION_TRANSPORT	0.46
DETECTION_OF_BIOTIC_STIMULUS	0.46
ECTODERM_DEVELOPMENT	0.46
INTEGRIN_BINDING	0.46
PROTEASE_INHIBITOR_ACTIVITY	0.46
HORMONE_BINDING	0.46
ENDOPLASMIC_RETICULUM	0.45
SYNAPTOGENESIS	0.45
INTRACELLULAR_TRANSPORT	0.45
RNA_EXPORT_FROM_NUCLEUS	0.45
REGULATION_OF_MAP_KINASE_ACTIVITY	0.45
DNA_RECOMBINATION	0.45
PROTEIN_HOMODIMERIZATION_ACTIVITY	0.45
PHOSPHATASE_INHIBITOR_ACTIVITY	0.45
3_5_CYCLIC_NUCLEOTIDE_PHOSPHODIESTERASE_ACTIVITY	0.45
INSOLUBLE_FRACTION	0.44
RESPONSE_TO_VIRUS	0.44
ISOPRENOID_METABOLIC_PROCESS	0.44
REGULATION_OF_PROTEIN_MODIFICATION_PROCESS	0.44
NUCLEAR_EXPORT	0.44
HEMOPOIETIC_OR_LYMPHOID_ORGAN_DEVELOPMENT	0.44
LYSOSOMAL_TRANSPORT	0.44
DNA_DEPENDENT_DNA_REPLICATION	0.44
REGULATION_OF_CELL_CYCLE	0.44
POSITIVE_REGULATION_OF_PEPTIDYL_TYROSINE_PHOSPHORYLATION	0.44
ALDO_KETO_REDUCTASE_ACTIVITY	0.44
SMALL_GTPASE_REGULATOR_ACTIVITY	0.44
GUANYL_NUCLEOTIDE_BINDING	0.44
TRANSCRIPTION_COFACTOR_ACTIVITY	0.44
KINETOCHORE	0.43
LEADING_EDGE	0.43
INORGANIC_ANION_TRANSPORT	0.43
CENTROSOME_ORGANIZATION_AND_BIOGENESIS	0.43
REGULATION_OF_BODY_FLUID_LEVELS	0.43
REGULATION_OF_PHOSPHORYLATION	0.43
REGULATION_OF_NUCLEOCYTOPLASMIC_TRANSPORT	0.43
RNA_PROCESSING	0.43
EMBRYO_IMPLANTATION	0.43
S_PHASE_OF_MITOTIC_CELL_CYCLE	0.43
REGULATION_OF_GTPASE_ACTIVITY	0.43
SMALL_GTPASE_MEDIATED_SIGNAL_TRANSDUCTION	0.43
HYDROLASE_ACTIVITY_HYDROLYZING_N_GLYCOSYL_COMPOUNDS	0.43
SULFURIC_ESTER_HYDROLASE_ACTIVITY	0.43
EXTRACELLULAR_LIGAND_GATED_ION_CHANNEL_ACTIVITY	0.43
TRANSFERASE_ACTIVITY_TRANSFERRING_PHOSPHORUS_CONTAINING_GROUPS	0.43
GUANYL_NUCLEOTIDE_EXCHANGE_FACTOR_ACTIVITY	0.43
ENDOCYTIC_VESICLE	0.42
CHROMOSOME	0.42
DETECTION_OF_CHEMICAL_STIMULUS	0.42
AMINO_ACID_CATABOLIC_PROCESS	0.42
COFACTOR_BIOSYNTHETIC_PROCESS	0.42
SECONDARY_ACTIVE_TRANSMEMBRANE_TRANSPORTER_ACTIVITY	0.42
ARYLSULFATASE_ACTIVITY	0.42
RIBONUCLEASE_ACTIVITY	0.42
IMMUNOLOGICAL_SYNAPSE	0.41
CONDENSED_NUCLEAR_CHROMOSOME	0.41
N_TERMINAL_PROTEIN_AMINO_ACID_MODIFICATION	0.41
MRNA_PROCESSING_GO_0006397	0.41
POSITIVE_REGULATION_OF_CELL_ADHESION	0.41
CYCLIC_NUCLEOTIDE_MEDIATED_SIGNALING	0.41
CELLULAR_RESPONSE_TO_NUTRIENT_LEVELS	0.41
ENZYME_ACTIVATOR_ACTIVITY	0.41
CARBOXYLIC_ACID_TRANSMEMBRANE_TRANSPORTER_ACTIVITY	0.41
ESTABLISHMENT_OF_LOCALIZATION	0.4
ORGANIC_ACID_TRANSPORT	0.4
IMMUNE_SYSTEM_DEVELOPMENT	0.4
BRAIN_DEVELOPMENT	0.4
NEGATIVE_REGULATION_OF_TRANSLATION	0.4
G_PROTEIN_COUPLED_RECEPTOR_PROTEIN_SIGNALING_PATHWAY	0.4
TRANSCRIPTION_FACTOR_BINDING	0.4
SITE_OF_POLARIZED_GROWTH	0.39
REGULATION_OF_SECRETION	0.39
CHROMATIN_REMODELING	0.39
REGULATION_OF_CYTOKINE_SECRETION	0.39
REGULATION_OF_PEPTIDYL_TYROSINE_PHOSPHORYLATION	0.39
SPERM_MOTILITY	0.39
AMINE_CATABOLIC_PROCESS	0.39
EXCRETION	0.39
SYNAPSE_ORGANIZATION_AND_BIOGENESIS	0.39
REGULATION_OF_ACTION_POTENTIAL	0.39
DNA_PACKAGING	0.39
ATP_DEPENDENT_HELICASE_ACTIVITY	0.39
VOLTAGE_GATED_CHANNEL_ACTIVITY	0.39
U12_DEPENDENT_SPLICEOSOME	0.38
CELLULAR_RESPONSE_TO_STRESS	0.38
INFLAMMATORY_RESPONSE	0.38
POSITIVE_REGULATION_OF_SECRETION	0.38
RAS_GUANYL_NUCLEOTIDE_EXCHANGE_FACTOR_ACTIVITY	0.38
PHOSPHATE_TRANSMEMBRANE_TRANSPORTER_ACTIVITY	0.38
SUBSTRATE_SPECIFIC_CHANNEL_ACTIVITY	0.38
RHO_GTPASE_ACTIVATOR_ACTIVITY	0.38
PHOSPHATASE_BINDING	0.38
LIPID_RAFT	0.37
NUCLEAR_MEMBRANE_PART	0.37
EXTRACELLULAR_STRUCTURE_ORGANIZATION_AND_BIOGENESIS	0.37
CATION_HOMEOSTASIS	0.37
POSITIVE_REGULATION_OF_PROTEIN_AMINO_ACID_PHOSPHORYLATION	0.37
STEROL_BINDING	0.37
ANION_TRANSMEMBRANE_TRANSPORTER_ACTIVITY	0.37
SIALYLTRANSFERASE_ACTIVITY	0.37
STRUCTURAL_CONSTITUENT_OF_CYTOSKELETON	0.37
TRANSMEMBRANE_RECEPTOR_PROTEIN_TYROSINE_KINASE_ACTIVITY	0.37
HISTONE_DEACETYLASE_COMPLEX	0.36
HETEROGENEOUS_NUCLEAR_RIBONUCLEOPROTEIN_COMPLEX	0.36
CORTICAL_CYTOSKELETON	0.36
ACTIVATION_OF_NF_KAPPAB_TRANSCRIPTION_FACTOR	0.36
DEFENSE_RESPONSE_TO_VIRUS	0.36
PROTEIN_EXPORT_FROM_NUCLEUS	0.36
POSITIVE_REGULATION_OF_CYTOKINE_SECRETION	0.36
RESPONSE_TO_WOUNDING	0.36
REGULATION_OF_I_KAPPAB_KINASE_NF_KAPPAB_CASCADE	0.36
REGULATION_OF_VIRAL_REPRODUCTION	0.36
ACETYLTRANSFERASE_ACTIVITY	0.36
AMINE_BINDING	0.36
ORGANELLAR_SMALL_RIBOSOMAL_SUBUNIT	0.35
MITOCHONDRIAL_SMALL_RIBOSOMAL_SUBUNIT	0.35
NUCLEAR_MATRIX	0.35
CYTOPLASMIC_VESICLE	0.35
MITOCHONDRIAL_RESPIRATORY_CHAIN	0.35
SMALL_RIBOSOMAL_SUBUNIT	0.35
PHOSPHOLIPID_BIOSYNTHETIC_PROCESS	0.35
AMINO_ACID_METABOLIC_PROCESS	0.35
MEIOTIC_CELL_CYCLE	0.35
PROTEOGLYCAN_METABOLIC_PROCESS	0.35
VACUOLAR_TRANSPORT	0.35
ANGIOGENESIS	0.35
DNA_FRAGMENTATION_DURING_APOPTOSIS	0.35
OXIDOREDUCTASE_ACTIVITY_ACTING_ON_THE_CH_CH_GROUP_OF_DONORS	0.35
STRUCTURAL_CONSTITUENT_OF_MUSCLE	0.35
PROTEIN_SERINE_THREONINE_PHOSPHATASE_COMPLEX	0.34
MICROTUBULE_ORGANIZING_CENTER_PART	0.34
VESICLE	0.34
CYTOSOLIC_PART	0.34
CELLULAR_COMPONENT_DISASSEMBLY	0.34
PYRIMIDINE_NUCLEOTIDE_METABOLIC_PROCESS	0.34
RNA_3END_PROCESSING	0.34
MRNA_METABOLIC_PROCESS	0.34
DNA_DAMAGE_RESPONSESIGNAL_TRANSDUCTION_BY_P53_CLASS_MEDIATOR	0.34
REGULATION_OF_IMMUNE_RESPONSE	0.34
SENSORY_ORGAN_DEVELOPMENT	0.34
AMINE_RECEPTOR_ACTIVITY	0.34
FUCOSYLTRANSFERASE_ACTIVITY	0.34
CARBON_OXYGEN_LYASE_ACTIVITY	0.34
CELL_SURFACE	0.33
CLATHRIN_COATED_VESICLE	0.33
AMINO_SUGAR_METABOLIC_PROCESS	0.33
MICROTUBULE_CYTOSKELETON_ORGANIZATION_AND_BIOGENESIS	0.33
CALCIUM_MEDIATED_SIGNALING	0.33
DNA_REPLICATION_INITIATION	0.33
CELLULAR_CATION_HOMEOSTASIS	0.33
REGULATION_OF_NEUROTRANSMITTER_LEVELS	0.33
REGULATION_OF_RHO_GTPASE_ACTIVITY	0.33
NOTCH_SIGNALING_PATHWAY	0.33
EXCITATORY_EXTRACELLULAR_LIGAND_GATED_ION_CHANNEL_ACTIVITY	0.33
LIGAND_DEPENDENT_NUCLEAR_RECEPTOR_ACTIVITY	0.33
GABA_RECEPTOR_ACTIVITY	0.33
CYTOSKELETAL_PROTEIN_BINDING	0.33
CYTOSKELETAL_PART	0.32
COLLAGEN	0.32
NEURITE_DEVELOPMENT	0.32
COENZYME_METABOLIC_PROCESS	0.32
POST_GOLGI_VESICLE_MEDIATED_TRANSPORT	0.32
ORGANIC_ACID_METABOLIC_PROCESS	0.32
REGULATION_OF_TRANSCRIPTION_FACTOR_ACTIVITY	0.32
PROTEIN_POLYMERIZATION	0.32
ALCOHOL_METABOLIC_PROCESS	0.32
RRNA_PROCESSING	0.32
REGULATION_OF_CELL_SHAPE	0.32
NEURON_DEVELOPMENT	0.32
PHOSPHORIC_MONOESTER_HYDROLASE_ACTIVITY	0.32
NON_MEMBRANE_SPANNING_PROTEIN_TYROSINE_KINASE_ACTIVITY	0.32
NEUROPEPTIDE_HORMONE_ACTIVITY	0.32
MICROVILLUS	0.31
VIRAL_GENOME_REPLICATION	0.31
MICROTUBULE_BASED_PROCESS	0.31
APOPTOTIC_NUCLEAR_CHANGES	0.31
AGING	0.31
VASCULATURE_DEVELOPMENT	0.31
REGULATION_OF_NEURON_APOPTOSIS	0.31
CYTOKINE_SECRETION	0.31
PHOSPHOTRANSFERASE_ACTIVITY_ALCOHOL_GROUP_AS_ACCEPTOR	0.31
METHYLTRANSFERASE_ACTIVITY	0.31
VOLTAGE_GATED_CATION_CHANNEL_ACTIVITY	0.31
IONOTROPIC_GLUTAMATE_RECEPTOR_ACTIVITY	0.31
SPINDLE	0.3
G2_M_TRANSITION_OF_MITOTIC_CELL_CYCLE	0.3
NEGATIVE_REGULATION_OF_CELLULAR_BIOSYNTHETIC_PROCESS	0.3
RAS_PROTEIN_SIGNAL_TRANSDUCTION	0.3
INTERACTION_WITH_HOST	0.3
LEARNING_AND_OR_MEMORY	0.3
ORGAN_DEVELOPMENT	0.3
PEPTIDE_BINDING	0.3
EXONUCLEASE_ACTIVITY	0.3
TRANSFERASE_ACTIVITY_TRANSFERRING_ONE_CARBON_GROUPS	0.3
ORGANELLE_INNER_MEMBRANE	0.29
PORE_COMPLEX	0.29
EXTRINSIC_TO_MEMBRANE	0.29
HETEROPHILIC_CELL_ADHESION	0.29
CARBOXYLIC_ACID_METABOLIC_PROCESS	0.29
RNA_ELONGATION	0.29
FEEDING_BEHAVIOR	0.29
NLS_BEARING_SUBSTRATE_IMPORT_INTO_NUCLEUS	0.29
REGULATION_OF_SMALL_GTPASE_MEDIATED_SIGNAL_TRANSDUCTION	0.29
POSITIVE_REGULATION_OF_JNK_ACTIVITY	0.29
INNATE_IMMUNE_RESPONSE	0.29
REGULATION_OF_RAS_GTPASE_ACTIVITY	0.29
POSITIVE_REGULATION_OF_CYTOKINE_PRODUCTION	0.29
INORGANIC_ANION_TRANSMEMBRANE_TRANSPORTER_ACTIVITY	0.29
CALCIUM_ION_TRANSMEMBRANE_TRANSPORTER_ACTIVITY	0.29
LYTIC_VACUOLE	0.28
LYSOSOME	0.28
POSITIVE_REGULATION_OF_CELL_DIFFERENTIATION	0.28
POSITIVE_REGULATION_OF_PHOSPHORYLATION	0.28
VIRAL_INFECTIOUS_CYCLE	0.28
NUCLEAR_ORGANIZATION_AND_BIOGENESIS	0.28
MONOCARBOXYLIC_ACID_METABOLIC_PROCESS	0.28
DEVELOPMENT_OF_PRIMARY_SEXUAL_CHARACTERISTICS	0.28
HOMEOSTATIC_PROCESS	0.28
MEIOTIC_RECOMBINATION	0.28
BETA_TUBULIN_BINDING	0.28
PEPTIDE_RECEPTOR_ACTIVITY	0.28
ISOMERASE_ACTIVITY	0.28
NUCLEAR_CHROMOSOME	0.27
INTERCALATED_DISC	0.27
ORGANELLE_MEMBRANE	0.27
GROWTH_CONE	0.27
NEGATIVE_REGULATION_OF_MULTICELLULAR_ORGANISMAL_PROCESS	0.27
PEROXISOME_ORGANIZATION_AND_BIOGENESIS	0.27
MUSCLE_CELL_DIFFERENTIATION	0.27
PROTEOGLYCAN_BIOSYNTHETIC_PROCESS	0.27
VIRAL_REPRODUCTION	0.27
POSITIVE_REGULATION_OF_HYDROLASE_ACTIVITY	0.27
DNA_CATABOLIC_PROCESS	0.27
NEGATIVE_REGULATION_OF_CELL_ADHESION	0.27
NEGATIVE_REGULATION_OF_MAP_KINASE_ACTIVITY	0.27
REGULATION_OF_INTRACELLULAR_TRANSPORT	0.27
CELL_MATRIX_ADHESION	0.27
PEPTIDYL_TYROSINE_MODIFICATION	0.27
MEMBRANE_FUSION	0.27
RESPONSE_TO_HYPOXIA	0.27
CARBOHYDRATE_BINDING	0.27
HYDRO_LYASE_ACTIVITY	0.27
TRANSMEMBRANE_RECEPTOR_PROTEIN_KINASE_ACTIVITY	0.27
PROTEIN_TRANSPORTER_ACTIVITY	0.27
SH2_DOMAIN_BINDING	0.27
HISTONE_ACETYLTRANSFERASE_ACTIVITY	0.27
RECEPTOR_SIGNALING_PROTEIN_ACTIVITY	0.27
LIGASE_ACTIVITY_FORMING_CARBON_OXYGEN_BONDS	0.27
SINGLE_STRANDED_RNA_BINDING	0.27
MITOCHONDRIAL_OUTER_MEMBRANE	0.26
REGULATION_OF_DNA_REPLICATION	0.26
CELLULAR_PROTEIN_COMPLEX_ASSEMBLY	0.26
ANATOMICAL_STRUCTURE_FORMATION	0.26
MITOCHONDRIAL_MEMBRANE_ORGANIZATION_AND_BIOGENESIS	0.26
PEPTIDYL_AMINO_ACID_MODIFICATION	0.26
RNA_SPLICINGVIA_TRANSESTERIFICATION_REACTIONS	0.26
NEUROTRANSMITTER_SECRETION	0.26
NEURON_APOPTOSIS	0.26
CARBONATE_DEHYDRATASE_ACTIVITY	0.26
METAL_ION_TRANSMEMBRANE_TRANSPORTER_ACTIVITY	0.26
PROTEIN_TETRAMERIZATION	0.25
VIRAL_REPRODUCTIVE_PROCESS	0.25
MYELOID_CELL_DIFFERENTIATION	0.25
LIPID_BIOSYNTHETIC_PROCESS	0.25
CELL_SUBSTRATE_ADHESION	0.25
TRANSPORT	0.25
STRIATED_MUSCLE_CONTRACTION_GO_0006941	0.25
NEGATIVE_REGULATION_OF_CATALYTIC_ACTIVITY	0.25
RESPONSE_TO_DRUG	0.25
PROTEIN_TYROSINE_PHOSPHATASE_ACTIVITY	0.25
PROTEIN_TYROSINE_KINASE_ACTIVITY	0.25
ACETYLGALACTOSAMINYLTRANSFERASE_ACTIVITY	0.25
PATTERN_RECOGNITION_RECEPTOR_ACTIVITY	0.25
EXTRACELLULAR_MATRIX_STRUCTURAL_CONSTITUENT	0.25
GOLGI_APPARATUS	0.24
OUTER_MEMBRANE	0.24
NUCLEAR_BODY	0.24
ORGANELLE_OUTER_MEMBRANE	0.24
GOLGI_STACK	0.24
SYNAPSE	0.24
SPLICEOSOME_ASSEMBLY	0.24
TISSUE_MORPHOGENESIS	0.24
VITAMIN_TRANSPORT	0.24
REGULATION_OF_GENE_SPECIFIC_TRANSCRIPTION	0.24
RESPONSE_TO_OXIDATIVE_STRESS	0.24
CELLULAR_HOMEOSTASIS	0.24
PERIPHERAL_NERVOUS_SYSTEM_DEVELOPMENT	0.24
NEGATIVE_REGULATION_OF_RESPONSE_TO_STIMULUS	0.24
N_ACETYLTRANSFERASE_ACTIVITY	0.24
AMINE_TRANSMEMBRANE_TRANSPORTER_ACTIVITY	0.24
3_5_EXONUCLEASE_ACTIVITY	0.24
CALCIUM_CHANNEL_ACTIVITY	0.24
INTERLEUKIN_RECEPTOR_ACTIVITY	0.24
SIGNAL_SEQUENCE_BINDING	0.24
ENVELOPE	0.23
ORGANELLE_ENVELOPE	0.23
ACTIN_FILAMENT_ORGANIZATION	0.23
POSITIVE_REGULATION_OF_PHOSPHATE_METABOLIC_PROCESS	0.23
NEGATIVE_REGULATION_OF_TRANSPORT	0.23
DI___TRI_VALENT_INORGANIC_CATION_TRANSPORT	0.23
CELL_STRUCTURE_DISASSEMBLY_DURING_APOPTOSIS	0.23
M_PHASE	0.23
MYOBLAST_DIFFERENTIATION	0.23
POSITIVE_REGULATION_OF_IMMUNE_RESPONSE	0.23
REGULATION_OF_CHROMOSOME_ORGANIZATION_AND_BIOGENESIS	0.23
PROTEIN_STABILIZATION	0.23
SMOOTH_MUSCLE_CONTRACTION_GO_0006939	0.23
NEGATIVE_REGULATION_OF_DNA_REPLICATION	0.23
HEART_DEVELOPMENT	0.23
POSITIVE_REGULATION_OF_PROTEIN_MODIFICATION_PROCESS	0.23
RECEPTOR_SIGNALING_PROTEIN_SERINE_THREONINE_KINASE_ACTIVITY	0.23
ACETYLGLUCOSAMINYLTRANSFERASE_ACTIVITY	0.23
CYTOPLASMIC_MEMBRANE_BOUND_VESICLE	0.22
NUCLEOLUS	0.22
REGULATION_OF_PROTEIN_AMINO_ACID_PHOSPHORYLATION	0.22
PHOTORECEPTOR_CELL_MAINTENANCE	0.22
COENZYME_BIOSYNTHETIC_PROCESS	0.22
LIPOPROTEIN_METABOLIC_PROCESS	0.22
METAL_ION_TRANSPORT	0.22
REGULATION_OF_CELL_DIFFERENTIATION	0.22
POSITIVE_REGULATION_OF_TRANSCRIPTION_FACTOR_ACTIVITY	0.22
SECRETION	0.22
GLYCEROPHOSPHOLIPID_METABOLIC_PROCESS	0.22
G1_PHASE	0.22
FATTY_ACID_METABOLIC_PROCESS	0.22
CENTROSOME_CYCLE	0.22
MONOVALENT_INORGANIC_CATION_TRANSPORT	0.22
M_PHASE_OF_MITOTIC_CELL_CYCLE	0.22
TRANSFERASE_ACTIVITY_TRANSFERRING_GLYCOSYL_GROUPS	0.22
PROTEIN_N_TERMINUS_BINDING	0.22
PROTEIN_SERINE_THREONINE_TYROSINE_KINASE_ACTIVITY	0.22
UNFOLDED_PROTEIN_BINDING	0.22
COATED_VESICLE	0.21
MICROTUBULE	0.21
FATTY_ACID_BETA_OXIDATION	0.21
ACTIVATION_OF_JNK_ACTIVITY	0.21
MONOVALENT_INORGANIC_CATION_HOMEOSTASIS	0.21
AXONOGENESIS	0.21
FATTY_ACID_BIOSYNTHETIC_PROCESS	0.21
FATTY_ACID_OXIDATION	0.21
PRODUCTION_OF_MOLECULAR_MEDIATOR_OF_IMMUNE_RESPONSE	0.21
CARBOXYLIC_ACID_TRANSPORT	0.21
POSITIVE_REGULATION_OF_PROTEIN_SECRETION	0.21
PEPTIDYL_TYROSINE_PHOSPHORYLATION	0.21
PROTEIN_IMPORT_INTO_NUCLEUS_TRANSLOCATION	0.21
BASE_EXCISION_REPAIR	0.21
THIOLESTER_HYDROLASE_ACTIVITY	0.21
SMALL_CONJUGATING_PROTEIN_BINDING	0.21
PHOSPHOINOSITIDE_BINDING	0.21
MOTOR_ACTIVITY	0.21
CYTOPLASMIC_PART	0.2
NUCLEAR_PORE	0.2
REGULATION_OF_RHO_PROTEIN_SIGNAL_TRANSDUCTION	0.2
REGULATION_OF_CELL_ADHESION	0.2
DEPHOSPHORYLATION	0.2
REGULATION_OF_MYELOID_CELL_DIFFERENTIATION	0.2
ACTIVATION_OF_IMMUNE_RESPONSE	0.2
MORPHOGENESIS_OF_AN_EPITHELIUM	0.2
RESPONSE_TO_OTHER_ORGANISM	0.2
TRICARBOXYLIC_ACID_CYCLE_INTERMEDIATE_METABOLIC_PROCESS	0.2
PROTEIN_MODIFICATION_PROCESS	0.2
STEROID_DEHYDROGENASE_ACTIVITY	0.2
NEUROPEPTIDE_RECEPTOR_ACTIVITY	0.2
TRANSCRIPTION_COREPRESSOR_ACTIVITY	0.2
PHOSPHOPROTEIN_PHOSPHATASE_ACTIVITY	0.2
SERINE_TYPE_ENDOPEPTIDASE_INHIBITOR_ACTIVITY	0.2
MEMBRANE_BOUND_VESICLE	0.19
INTERCELLULAR_JUNCTION	0.19
ENDOSOME	0.19
CENTROSOME	0.19
REGULATION_OF_AXONOGENESIS	0.19
REGULATION_OF_PH	0.19
PROTEIN_AMINO_ACID_LIPIDATION	0.19
NEGATIVE_REGULATION_OF_CELL_DIFFERENTIATION	0.19
REGULATION_OF_MITOTIC_CELL_CYCLE	0.19
COFACTOR_TRANSPORT	0.19
OXYGEN_AND_REACTIVE_OXYGEN_SPECIES_METABOLIC_PROCESS	0.19
BODY_FLUID_SECRETION	0.19
MITOSIS	0.19
OXIDOREDUCTASE_ACTIVITY_ACTING_ON_SULFUR_GROUP_OF_DONORS	0.19
CATION_CHANNEL_ACTIVITY	0.19
INTERLEUKIN_BINDING	0.19
CHAPERONE_BINDING	0.19
ATP_DEPENDENT_RNA_HELICASE_ACTIVITY	0.19
POTASSIUM_CHANNEL_ACTIVITY	0.19
RUFFLE	0.18
DENDRITE	0.18
SECRETION_BY_CELL	0.18
CELL_CYCLE_CHECKPOINT_GO_0000075	0.18
ADAPTIVE_IMMUNE_RESPONSE_GO_0002460	0.18
POST_TRANSLATIONAL_PROTEIN_MODIFICATION	0.18
G1_PHASE_OF_MITOTIC_CELL_CYCLE	0.18
BIOPOLYMER_MODIFICATION	0.18
CATION_TRANSPORT	0.18
CDC42_PROTEIN_SIGNAL_TRANSDUCTION	0.18
POSITIVE_REGULATION_OF_DNA_BINDING	0.18
PHOSPHORYLATION	0.18
MICROTUBULE_BASED_MOVEMENT	0.18
ION_TRANSPORT	0.18
NEUROPEPTIDE_BINDING	0.18
IDENTICAL_PROTEIN_BINDING	0.18
NUCLEOTIDYLTRANSFERASE_ACTIVITY	0.18
PROTEIN_SERINE_THREONINE_KINASE_ACTIVITY	0.18
RNA_POLYMERASE_ACTIVITY	0.18
PROTEIN_PHOSPHATASE_BINDING	0.18
ADHERENS_JUNCTION	0.17
MICROTUBULE_ASSOCIATED_COMPLEX	0.17
SPINDLE_POLE	0.17
GLYCEROPHOSPHOLIPID_BIOSYNTHETIC_PROCESS	0.17
NEGATIVE_REGULATION_OF_DNA_METABOLIC_PROCESS	0.17
GLUTAMATE_SIGNALING_PATHWAY	0.17
FOCAL_ADHESION_FORMATION	0.17
SULFUR_COMPOUND_BIOSYNTHETIC_PROCESS	0.17
CELLULAR_MORPHOGENESIS_DURING_DIFFERENTIATION	0.17
N_ACETYLGLUCOSAMINE_METABOLIC_PROCESS	0.17
IMMUNE_EFFECTOR_PROCESS	0.17
CELL_MIGRATION	0.17
ANTIPORTER_ACTIVITY	0.17
AMINO_ACID_TRANSMEMBRANE_TRANSPORTER_ACTIVITY	0.17
DELAYED_RECTIFIER_POTASSIUM_CHANNEL_ACTIVITY	0.17
POTASSIUM_CHANNEL_REGULATOR_ACTIVITY	0.17
EXTRINSIC_TO_PLASMA_MEMBRANE	0.16
CORNIFIED_ENVELOPE	0.16
PROTEIN_AMINO_ACID_N_LINKED_GLYCOSYLATION	0.16
SULFUR_METABOLIC_PROCESS	0.16
NEGATIVE_REGULATION_OF_IMMUNE_SYSTEM_PROCESS	0.16
CALCIUM_ION_TRANSPORT	0.16
ORGAN_MORPHOGENESIS	0.16
NEGATIVE_REGULATION_OF_SECRETION	0.16
VESICLE_MEDIATED_TRANSPORT	0.16
REGULATION_OF_CYTOSKELETON_ORGANIZATION_AND_BIOGENESIS	0.16
REGULATION_OF_JNK_ACTIVITY	0.16
REGULATION_OF_PROTEIN_SECRETION	0.16
GLUCOSAMINE_METABOLIC_PROCESS	0.16
CELLULAR_RESPIRATION	0.16
RNA_DEPENDENT_ATPASE_ACTIVITY	0.16
INTERMEDIATE_FILAMENT_CYTOSKELETON	0.15
INTERMEDIATE_FILAMENT	0.15
MUSCLE_DEVELOPMENT	0.15
REGULATION_OF_CELLULAR_COMPONENT_ORGANIZATION_AND_BIOGENESIS	0.15
NEGATIVE_REGULATION_OF_CELLULAR_COMPONENT_ORGANIZATION_AND_BIOGENESIS	0.15
BILE_ACID_METABOLIC_PROCESS	0.15
ACUTE_INFLAMMATORY_RESPONSE	0.15
STEROID_BIOSYNTHETIC_PROCESS	0.15
MANNOSYLTRANSFERASE_ACTIVITY	0.15
NEUROTRANSMITTER_RECEPTOR_ACTIVITY	0.15
PURINE_RIBONUCLEOTIDE_BINDING	0.15
VACUOLE	0.14
MITOCHONDRIAL_INNER_MEMBRANE	0.14
MICROTUBULE_ORGANIZING_CENTER	0.14
NEURON_PROJECTION	0.14
POSITIVE_REGULATION_OF_BINDING	0.14
REGULATION_OF_RAS_PROTEIN_SIGNAL_TRANSDUCTION	0.14
PEPTIDE_METABOLIC_PROCESS	0.14
REGULATION_OF_ORGANELLE_ORGANIZATION_AND_BIOGENESIS	0.14
CELL_CELL_ADHESION	0.14
LIPOPROTEIN_BIOSYNTHETIC_PROCESS	0.14
ADAPTIVE_IMMUNE_RESPONSE	0.14
REGULATION_OF_NEUROGENESIS	0.14
REGULATION_OF_TRANSPORT	0.14
ACTIN_FILAMENT_BUNDLE_FORMATION	0.14
POSITIVE_REGULATION_OF_CELL_CYCLE	0.14
NEGATIVE_REGULATION_OF_CELL_MIGRATION	0.14
OXIDOREDUCTASE_ACTIVITY_ACTING_ON_THE_CH_NH_GROUP_OF_DONORS	0.14
PROTEIN_KINASE_ACTIVITY	0.14
NUCLEASE_ACTIVITY	0.14
AXON	0.13
INTEGRATOR_COMPLEX	0.13
EPITHELIAL_CELL_DIFFERENTIATION	0.13
INTERLEUKIN_2_PRODUCTION	0.13
AMINE_TRANSPORT	0.13
CELLULAR_POLYSACCHARIDE_METABOLIC_PROCESS	0.13
PURINE_NUCLEOTIDE_BINDING	0.13
COLLAGEN_BINDING	0.13
L_AMINO_ACID_TRANSMEMBRANE_TRANSPORTER_ACTIVITY	0.13
SYNAPSE_PART	0.12
BASOLATERAL_PLASMA_MEMBRANE	0.12
PROTEIN_OLIGOMERIZATION	0.12
GLYCOPROTEIN_METABOLIC_PROCESS	0.12
GLUCOSE_CATABOLIC_PROCESS	0.12
ANATOMICAL_STRUCTURE_MORPHOGENESIS	0.12
MITOTIC_SISTER_CHROMATID_SEGREGATION	0.12
CELLULAR_MONOVALENT_INORGANIC_CATION_HOMEOSTASIS	0.12
DIGESTION	0.12
PROTEIN_HOMOOLIGOMERIZATION	0.12
SISTER_CHROMATID_SEGREGATION	0.12
RNA_CATABOLIC_PROCESS	0.12
COPPER_ION_BINDING	0.12
MICROTUBULE_BINDING	0.12
ADP_BINDING	0.12
NEUROTRANSMITTER_BINDING	0.12
INTRAMOLECULAR_OXIDOREDUCTASE_ACTIVITY	0.12
DEOXYRIBONUCLEASE_ACTIVITY	0.12
CYTOKINE_BINDING	0.12
TIGHT_JUNCTION	0.11
LYSOSOMAL_MEMBRANE	0.11
RIBOSOMAL_SUBUNIT	0.11
PROTEIN_AUTOPROCESSING	0.11
REGULATION_OF_MUSCLE_CONTRACTION	0.11
PROTEIN_AMINO_ACID_AUTOPHOSPHORYLATION	0.11
ICOSANOID_METABOLIC_PROCESS	0.11
DEFENSE_RESPONSE_TO_BACTERIUM	0.11
MRNA_SPLICE_SITE_SELECTION	0.11
MALE_GONAD_DEVELOPMENT	0.11
PROTEIN_AMINO_ACID_DEPHOSPHORYLATION	0.11
LEUKOCYTE_MIGRATION	0.11
DAMAGED_DNA_BINDING	0.11
ZINC_ION_BINDING	0.11
MITOCHONDRIAL_PART	0.1
MICROTUBULE_CYTOSKELETON	0.1
MITOCHONDRIAL_MEMBRANE	0.1
UBIQUITIN_LIGASE_COMPLEX	0.1
NUCLEAR_ENVELOPE_ENDOPLASMIC_RETICULUM_NETWORK	0.1
NICOTINIC_ACETYLCHOLINE_GATED_RECEPTOR_CHANNEL_COMPLEX	0.1
NUCLEAR_SPECK	0.1
REGULATION_OF_CELLULAR_PH	0.1
TUBE_MORPHOGENESIS	0.1
SUPEROXIDE_METABOLIC_PROCESS	0.1
NEGATIVE_REGULATION_OF_CYTOSKELETON_ORGANIZATION_AND_BIOGENESIS	0.1
CHROMOSOME_SEGREGATION	0.1
ANION_TRANSPORT	0.1
ELECTRON_TRANSPORT_GO_0006118	0.1
REGULATION_OF_BLOOD_PRESSURE	0.1
POLYSACCHARIDE_METABOLIC_PROCESS	0.1
PROTEIN_AMINO_ACID_PHOSPHORYLATION	0.1
POTASSIUM_ION_TRANSPORT	0.1
SMALL_CONJUGATING_PROTEIN_SPECIFIC_PROTEASE_ACTIVITY	0.1
SEQUENCE_SPECIFIC_DNA_BINDING	0.1
KINASE_ACTIVATOR_ACTIVITY	0.1
NICOTINIC_ACETYLCHOLINE_ACTIVATED_CATION_SELECTIVE_CHANNEL_ACTIVITY	0.1
GLUTATHIONE_TRANSFERASE_ACTIVITY	0.1
SECRETIN_LIKE_RECEPTOR_ACTIVITY	0.1
CELL_JUNCTION	0.09
KINESIN_COMPLEX	0.09
VACUOLAR_PART	0.09
PERINUCLEAR_REGION_OF_CYTOPLASM	0.09
CELL_SUBSTRATE_ADHERENS_JUNCTION	0.09
CELL_MATRIX_JUNCTION	0.09
EXTRACELLULAR_MATRIX	0.09
SECRETORY_PATHWAY	0.09
STRIATED_MUSCLE_DEVELOPMENT	0.09
RESPONSE_TO_TOXIN	0.09
REGULATION_OF_ENDOCYTOSIS	0.09
CELLULAR_CARBOHYDRATE_CATABOLIC_PROCESS	0.09
CATABOLIC_PROCESS	0.09
MITOCHONDRIAL_TRANSPORT	0.09
VOLTAGE_GATED_POTASSIUM_CHANNEL_ACTIVITY	0.09
STEROID_DEHYDROGENASE_ACTIVITY_ACTING_ON_THE_CH_OH_GROUP_OF_DONORSNAD_OR_NADP_AS_ACCEPTOR	0.09
UBIQUITIN_BINDING	0.09
PROTEINACEOUS_EXTRACELLULAR_MATRIX	0.08
EXTRACELLULAR_MATRIX_PART	0.08
VACUOLAR_MEMBRANE	0.08
PROTON_TRANSPORTING_TWO_SECTOR_ATPASE_COMPLEX	0.08
AXON_GUIDANCE	0.08
GLYCOLIPID_METABOLIC_PROCESS	0.08
PROTEIN_PROCESSING	0.08
ENDOSOME_TRANSPORT	0.08
ACTIN_FILAMENT_BASED_MOVEMENT	0.08
APOPTOTIC_PROGRAM	0.08
CYTOSKELETON_DEPENDENT_INTRACELLULAR_TRANSPORT	0.08
REGULATION_OF_IMMUNE_EFFECTOR_PROCESS	0.08
CHROMOSOME_CONDENSATION	0.08
MRNA_BINDING	0.08
SUGAR_BINDING	0.08
NEUTRAL_AMINO_ACID_TRANSMEMBRANE_TRANSPORTER_ACTIVITY	0.08
ADENYL_RIBONUCLEOTIDE_BINDING	0.08
HEMATOPOIETIN_INTERFERON_CLASSD200_DOMAIN_CYTOKINE_RECEPTOR_ACTIVITY	0.08
COENZYME_BINDING	0.08
GALACTOSYLTRANSFERASE_ACTIVITY	0.08
ORGANELLAR_RIBOSOME	0.07
BASAL_LAMINA	0.07
ENDOPLASMIC_RETICULUM_MEMBRANE	0.07
CYTOSOL	0.07
MITOCHONDRIAL_RIBOSOME	0.07
GLUCAN_METABOLIC_PROCESS	0.07
SPERMATID_DEVELOPMENT	0.07
LIPID_TRANSPORT	0.07
CELLULAR_CATABOLIC_PROCESS	0.07
UNFOLDED_PROTEIN_RESPONSE	0.07
SPERMATID_DIFFERENTIATION	0.07
MICROTUBULE_POLYMERIZATION_OR_DEPOLYMERIZATION	0.07
NUCLEOTIDE_BINDING	0.07
UDP_GLYCOSYLTRANSFERASE_ACTIVITY	0.07
TUBULIN_BINDING	0.07
MAGNESIUM_ION_BINDING	0.07
TRANSITION_METAL_ION_BINDING	0.07
ATP_BINDING	0.07
DNA_DIRECTED_RNA_POLYMERASE_COMPLEX	0.06
DYSTROPHIN_ASSOCIATED_GLYCOPROTEIN_COMPLEX	0.06
RNA_POLYMERASE_COMPLEX	0.06
NUCLEAR_DNA_DIRECTED_RNA_POLYMERASE_COMPLEX	0.06
MICROBODY	0.06
PEROXISOME	0.06
GLUCOSE_METABOLIC_PROCESS	0.06
AMINO_ACID_TRANSPORT	0.06
AEROBIC_RESPIRATION	0.06
TUBE_DEVELOPMENT	0.06
PHAGOCYTOSIS	0.06
LEUKOCYTE_CHEMOTAXIS	0.06
INTERLEUKIN_1_SECRETION	0.06
NEUTRAL_AMINO_ACID_TRANSPORT	0.06
PROTEIN_CATABOLIC_PROCESS	0.06
RESPONSE_TO_BIOTIC_STIMULUS	0.06
PHOSPHOINOSITIDE_BIOSYNTHETIC_PROCESS	0.06
GOLGI_VESICLE_TRANSPORT	0.06
EMBRYONIC_DEVELOPMENT	0.06
ER_NUCLEAR_SIGNALING_PATHWAY	0.06
PHOSPHOINOSITIDE_METABOLIC_PROCESS	0.06
CARBOHYDRATE_CATABOLIC_PROCESS	0.06
RNA_HELICASE_ACTIVITY	0.06
INWARD_RECTIFIER_POTASSIUM_CHANNEL_ACTIVITY	0.06
HYDROLASE_ACTIVITY_ACTING_ON_CARBON_NITROGEN_NOT_PEPTIDEBONDS	0.06
TRANSFERASE_ACTIVITY_TRANSFERRING_HEXOSYL_GROUPS	0.06
ADENYL_NUCLEOTIDE_BINDING	0.06
TRANSFERASE_ACTIVITY_TRANSFERRING_ALKYL_OR_ARYLOTHER_THAN_METHYLGROUPS	0.06
CHANNEL_REGULATOR_ACTIVITY	0.06
MAP_KINASE_KINASE_KINASE_ACTIVITY	0.06
BASEMENT_MEMBRANE	0.05
APICAL_JUNCTION_COMPLEX	0.05
NUCLEOLAR_PART	0.05
APICOLATERAL_PLASMA_MEMBRANE	0.05
MITOCHONDRIAL_MEMBRANE_PART	0.05
REGULATION_OF_MITOSIS	0.05
RESPONSE_TO_STEROID_HORMONE_STIMULUS	0.05
NEUROPEPTIDE_SIGNALING_PATHWAY	0.05
VACUOLE_ORGANIZATION_AND_BIOGENESIS	0.05
CALCIUM_ION_BINDING	0.05
AUXILIARY_TRANSPORT_PROTEIN_ACTIVITY	0.05
NUCLEAR_UBIQUITIN_LIGASE_COMPLEX	0.04
FOCAL_ADHESION	0.04
MITOCHONDRIAL_ENVELOPE	0.04
ENDOPLASMIC_RETICULUM_LUMEN	0.04
ENDOPLASMIC_RETICULUM_PART	0.04
BIOPOLYMER_CATABOLIC_PROCESS	0.04
MITOTIC_CELL_CYCLE_CHECKPOINT	0.04
ENERGY_RESERVE_METABOLIC_PROCESS	0.04
PROTEIN_TARGETING_TO_MITOCHONDRION	0.04
POSITIVE_REGULATION_OF_TRANSPORT	0.04
REGULATION_OF_HOMEOSTATIC_PROCESS	0.04
GLYCOPROTEIN_BIOSYNTHETIC_PROCESS	0.04
DOUBLE_STRAND_BREAK_REPAIR	0.04
SYNAPTIC_VESICLE	0.03
RECEPTOR_COMPLEX	0.03
INTEGRIN_COMPLEX	0.03
REGULATION_OF_SYNAPSE_STRUCTURE_AND_ACTIVITY	0.03
MITOCHONDRION_ORGANIZATION_AND_BIOGENESIS	0.03
RESPONSE_TO_BACTERIUM	0.03
MACROMOLECULE_CATABOLIC_PROCESS	0.03
SKELETAL_MUSCLE_DEVELOPMENT	0.03
PROTEIN_AMINO_ACID_O_LINKED_GLYCOSYLATION	0.03
SULFOTRANSFERASE_ACTIVITY	0.03
ORGANIC_ANION_TRANSMEMBRANE_TRANSPORTER_ACTIVITY	0.03
DNA_POLYMERASE_ACTIVITY	0.03
DNA_DIRECTED_DNA_POLYMERASE_ACTIVITY	0.03
TRANSFERASE_ACTIVITY_TRANSFERRING_SULFUR_CONTAINING_GROUPS	0.03
SMALL_NUCLEAR_RIBONUCLEOPROTEIN_COMPLEX	0.02
DNA_DIRECTED_RNA_POLYMERASEII_CORE_COMPLEX	0.02
MITOCHONDRION	0.02
LYSOSOME_ORGANIZATION_AND_BIOGENESIS	0.02
CELLULAR_PROTEIN_CATABOLIC_PROCESS	0.02
CALCIUM_INDEPENDENT_CELL_CELL_ADHESION	0.02
ENERGY_DERIVATION_BY_OXIDATION_OF_ORGANIC_COMPOUNDS	0.02
OLIGOSACCHARIDE_METABOLIC_PROCESS	0.02
EMBRYONIC_MORPHOGENESIS	0.02
ER_TO_GOLGI_VESICLE_MEDIATED_TRANSPORT	0.02
NEGATIVE_REGULATION_OF_TRANSFERASE_ACTIVITY	0.02
CARBOHYDRATE_BIOSYNTHETIC_PROCESS	0.02
CASPASE_ACTIVATION	0.02
CATION_BINDING	0.02
ION_BINDING	0.02
ANTIOXIDANT_ACTIVITY	0.02
G_PROTEIN_SIGNALING_ADENYLATE_CYCLASE_INHIBITING_PATHWAY	0.01
INTRA_GOLGI_VESICLE_MEDIATED_TRANSPORT	0.01
GENERATION_OF_PRECURSOR_METABOLITES_AND_ENERGY	0.01
MESODERM_DEVELOPMENT	0.01
POSITIVE_REGULATION_OF_CASPASE_ACTIVITY	0.01
CELLULAR_CARBOHYDRATE_METABOLIC_PROCESS	0.01
HOMEOSTASIS_OF_NUMBER_OF_CELLS	0.01
GLYCOSPHINGOLIPID_METABOLIC_PROCESS	0.01
APOPTOTIC_MITOCHONDRIAL_CHANGES	0.01
CELLULAR_MACROMOLECULE_CATABOLIC_PROCESS	0.01
OXIDOREDUCTASE_ACTIVITY_ACTING_ON_PEROXIDE_AS_ACCEPTOR	0.01
MONOSACCHARIDE_TRANSMEMBRANE_TRANSPORTER_ACTIVITY	0.01
PROTEIN_SERINE_THREONINE_PHOSPHATASE_ACTIVITY	0.01
HYDROLASE_ACTIVITY_ACTING_ON_CARBON_NITROGEN_NOT_PEPTIDEBONDSIN_CYCLIC_AMIDINES	0.01
DEAMINASE_ACTIVITY	0.01
OXIDOREDUCTASE_ACTIVITY_ACTING_ON_CH_OH_GROUP_OF_DONORS	0.01
TRNA_PROCESSING	0
CARBOHYDRATE_TRANSPORT	0
TRNA_METABOLIC_PROCESS	0
CARBOHYDRATE_METABOLIC_PROCESS	0
OXIDOREDUCTASE_ACTIVITY_GO_0016616	0
SUGAR_TRANSMEMBRANE_TRANSPORTER_ACTIVITY	0
CARBOHYDRATE_TRANSMEMBRANE_TRANSPORTER_ACTIVITY	0

## Sheet: Variant category analyses
LDLR
Type	NumLoci	NumCont	MeanCont	NumCase	MeanCase	OR	SLP
IntronicEtc	780	27207	0.17376	7854	0.178281	1.01 (0.99 - 1.04)	0.47
FivePrime	24	55	0.000351	21	0.000477	1.43 (0.85 - 2.41)	0.78
Synonymous	207	2582	0.01649	682	0.015481	0.92 (0.84 - 1.00)	-1.31
SpliceRegion	60	6649	0.042464	1735	0.039383	0.86 (0.81 - 0.92)	-5.21
ThreePrime	20	506	0.003232	139	0.003155	0.98 (0.81 - 1.19)	-0.06
ProteinAltering	405	4947	0.031594	1800	0.040859	1.15 (1.05 - 1.25)	2.87
InDel	4	0	0	10	0.000227		6.58
Disruptive	23	3	1.9e-05	31	0.000704	40.02 (11.83 - 135.33)	16.95
SpliceSite	6	2	1.3e-05	11	0.00025	23.31 (4.96 - 109.42)	5.55
SIFT	207	702	0.004483	473	0.010737	1.74 (1.41 - 2.14)	6.87
PossDam	78	400	0.002555	200	0.00454	1.20 (0.96 - 1.49)	1.02
ProbDam	123	539	0.003442	350	0.007945	1.30 (1.03 - 1.65)	1.66
G6PC
Type	NumLoci	NumCont	MeanCont	NumCase	MeanCase	OR	SLP
IntronicEtc	160	4859	0.031032	1472	0.033414	1.02 (0.96 - 1.09)	0.29
FivePrime	16	501	0.0032	154	0.003496	1.08 (0.90 - 1.30)	0.38
Synonymous	65	1019	0.006508	325	0.007377	1.09 (0.95 - 1.24)	0.65
SpliceRegion	14	31	0.000198	13	0.000295	1.46 (0.74 - 2.87)	0.56
ThreePrime	19	446	0.002848	201	0.004563	1.15 (0.96 - 1.38)	0.94
ProteinAltering	143	779	0.004975	306	0.006946	1.26 (1.00 - 1.60)	1.32
InDel	2	7	4.5e-05	0	0		-0.44
Disruptive	19	243	0.001552	79	0.001793	1.19 (0.91 - 1.54)	0.72
SpliceSite	4	10	6.4e-05	2	4.5e-05	0.68 (0.14 - 3.24)	0
SIFT	80	375	0.002395	156	0.003541	1.02 (0.74 - 1.40)	0.04
PossDam	21	148	0.000945	52	0.00118	1.02 (0.69 - 1.51)	0.03
ProbDam	55	315	0.002012	134	0.003042	1.18 (0.84 - 1.66)	0.48
SULT1E1
Type	NumLoci	NumCont	MeanCont	NumCase	MeanCase	OR	SLP
IntronicEtc	282	3739	0.023879	1165	0.026445	1.07 (1.00 - 1.14)	1.2
FivePrime	1	1	6e-06	1	2.3e-05	4.63 (0.27 - 78.62)	0.41
Synonymous	46	365	0.002331	122	0.002769	1.12 (0.91 - 1.38)	0.54
SpliceRegion	14	91	0.000581	50	0.001135	1.47 (1.02 - 2.11)	1.47
ThreePrime	12	73	0.000466	27	0.000613	1.22 (0.77 - 1.93)	0.42
ProteinAltering	119	1140	0.007281	391	0.008875	1.24 (1.08 - 1.42)	2.74
InDel	1	8	5.1e-05	3	6.8e-05	1.45 (0.37 - 5.71)	0.15
Disruptive	10	29	0.000185	21	0.000477	2.51 (1.41 - 4.49)	2.82
SpliceSite	4	4	2.6e-05	0	0		-0.23
SIFT	67	275	0.001756	93	0.002111	0.95 (0.55 - 1.65)	-0.07
PossDam	16	115	0.000734	44	0.000999	1.18 (0.66 - 2.14)	0.25
ProbDam	43	138	0.000881	43	0.000976	0.94 (0.49 - 1.79)	-0.07
LOC101928415
Type	NumLoci	NumCont	MeanCont	NumCase	MeanCase	OR	SLP
IntronicEtc	903	20873	0.133307	4986	0.113179	1.05 (1.02 - 1.08)	3.39
FivePrime	0	0	0	0	0		0
Synonymous	0	0	0	0	0		0
SpliceRegion	0	0	0	0	0		0
ThreePrime	0	0	0	0	0		0
ProteinAltering	0	0	0	0	0		0
InDel	0	0	0	0	0		0
Disruptive	0	0	0	0	0		0
SpliceSite	0	0	0	0	0		0
SIFT	0	0	0	0	0		0
PossDam	0	0	0	0	0		0
ProbDam	0	0	0	0	0		0
SLC35G1
Type	NumLoci	NumCont	MeanCont	NumCase	MeanCase	OR	SLP
IntronicEtc	109	728	0.004649	222	0.005039	1.05 (0.90 - 1.23)	0.29
FivePrime	45	1132	0.00723	358	0.008126	1.11 (0.95 - 1.29)	0.75
Synonymous	67	828	0.005288	263	0.00597	1.05 (0.88 - 1.25)	0.22
SpliceRegion	4	441	0.002816	154	0.003496	1.28 (1.06 - 1.54)	2.02
ThreePrime	23	111	0.000709	34	0.000772	1.08 (0.73 - 1.61)	0.16
ProteinAltering	159	1632	0.010423	545	0.012371	1.17 (1.01 - 1.36)	1.48
InDel	1	1	6e-06	0	0		0
Disruptive	11	27	0.000172	9	0.000204	1.05 (0.48 - 2.29)	0.16
SpliceSite	1	29	0.000185	10	0.000227	1.15 (0.55 - 2.42)	0.25
SIFT	72	885	0.005652	299	0.006787	0.81 (0.46 - 1.40)	-0.36
PossDam	28	444	0.002836	156	0.003541	1.33 (0.76 - 2.31)	0.51
ProbDam	31	429	0.00274	144	0.003269	1.28 (0.71 - 2.30)	0.4
PLA2G5
Type	NumLoci	NumCont	MeanCont	NumCase	MeanCase	OR	SLP
IntronicEtc	248	5879	0.037547	1729	0.039247	1.02 (0.96 - 1.08)	0.31
FivePrime	80	2108	0.013463	655	0.014868	1.07 (0.98 - 1.18)	0.92
Synonymous	36	904	0.005773	311	0.00706	1.22 (1.06 - 1.39)	2.47
SpliceRegion	10	19	0.000121	2	4.5e-05	0.38 (0.08 - 1.69)	-0.54
ThreePrime	22	108	0.00069	36	0.000817	1.24 (0.84 - 1.83)	0.56
ProteinAltering	67	294	0.001878	104	0.002361	1.21 (0.90 - 1.62)	0.7
InDel	2	12	7.7e-05	1	2.3e-05	0.29 (0.04 - 2.33)	-0.49
Disruptive	7	8	5.1e-05	5	0.000113	1.76 (0.55 - 5.68)	0.75
SpliceSite	3	4	2.6e-05	4	9.1e-05	3.72 (0.89 - 15.59)	1.12
SIFT	29	100	0.000639	39	0.000885	1.05 (0.58 - 1.91)	0.06
PossDam	10	15	9.6e-05	3	6.8e-05	0.47 (0.13 - 1.77)	-0.11
ProbDam	22	46	0.000294	21	0.000477	1.31 (0.63 - 2.72)	0.34
CMTM7
Type	NumLoci	NumCont	MeanCont	NumCase	MeanCase	OR	SLP
IntronicEtc	234	2804	0.017908	825	0.018727	1.05 (0.97 - 1.14)	0.62
FivePrime	35	135	0.000862	54	0.001226	1.34 (0.97 - 1.85)	1.15
Synonymous	42	888	0.005671	266	0.006038	1.02 (0.88 - 1.18)	0.09
SpliceRegion	11	121	0.000773	39	0.000885	1.15 (0.79 - 1.68)	0.33
ThreePrime	19	86	0.000549	24	0.000545	0.93 (0.58 - 1.49)	-0.12
ProteinAltering	85	1822	0.011636	548	0.012439	1.04 (0.94 - 1.16)	0.39
InDel	0	0	0	0	0		0
Disruptive	4	13	8.3e-05	8	0.000182	2.56 (1.03 - 6.36)	0.97
SpliceSite	2	2	1.3e-05	3	6.8e-05	5.19 (0.82 - 33.01)	1.13
SIFT	44	75	0.000479	34	0.000772	1.54 (0.83 - 2.85)	0.79
PossDam	20	48	0.000307	22	0.000499	1.22 (0.69 - 2.18)	0.31
ProbDam	16	37	0.000236	14	0.000318	0.84 (0.35 - 2.03)	-0.16
MIR6716
Type	NumLoci	NumCont	MeanCont	NumCase	MeanCase	OR	SLP
IntronicEtc	8	21	0.000134	5	0.000113	0.78 (0.29 - 2.14)	0
FivePrime	0	0	0	0	0		0
Synonymous	0	0	0	0	0		0
SpliceRegion	0	0	0	0	0		0
ThreePrime	0	0	0	0	0		0
ProteinAltering	0	0	0	0	0		0
InDel	0	0	0	0	0		0
Disruptive	0	0	0	0	0		0
SpliceSite	0	0	0	0	0		0
SIFT	0	0	0	0	0		0
PossDam	0	0	0	0	0		0
ProbDam	0	0	0	0	0		0
COL4A2-AS2
Type	NumLoci	NumCont	MeanCont	NumCase	MeanCase	OR	SLP
IntronicEtc	230	4138	0.026428	1264	0.028692	1.07 (1.00 - 1.13)	1.47
FivePrime	0	0	0	0	0		0
Synonymous	8	327	0.002088	97	0.002202	1.01 (0.79 - 1.28)	0.03
SpliceRegion	4	15	9.6e-05	6	0.000136	1.56 (0.59 - 4.14)	0.36
ThreePrime	0	0	0	0	0		0
ProteinAltering	26	804	0.005135	270	0.006129	1.16 (0.98 - 1.37)	1.09
InDel	0	0	0	0	0		0
Disruptive	2	1	6e-06	1	2.3e-05	2.91 (0.15 - 54.84)	0.41
SpliceSite	1	0	0	5	0.000113		3.29
SIFT	9	35	0.000224	16	0.000363	0.93 (0.37 - 2.34)	-0.06
PossDam	8	160	0.001022	54	0.001226	1.03 (0.72 - 1.48)	0.06
ProbDam	7	31	0.000198	18	0.000409	1.90 (0.76 - 4.73)	1.64
DEFB131A
Type	NumLoci	NumCont	MeanCont	NumCase	MeanCase	OR	SLP
IntronicEtc	56	876	0.005595	262	0.005947	1.06 (0.91 - 1.23)	0.36
FivePrime	0	0	0	0	0		0
Synonymous	21	130	0.00083	40	0.000908	1.05 (0.73 - 1.52)	0.11
SpliceRegion	0	0	0	0	0		0
ThreePrime	0	0	0	0	0		0
ProteinAltering	57	1548	0.009886	492	0.011168	1.08 (0.95 - 1.22)	0.67
InDel	0	0	0	0	0		0
Disruptive	7	12	7.7e-05	4	9.1e-05	1.33 (0.41 - 4.34)	0.12
SpliceSite	3	5	3.2e-05	4	9.1e-05	1.74 (0.61 - 5.00)	0.94
SIFT	29	345	0.002203	136	0.003087	1.35 (1.06 - 1.73)	1.86
PossDam	13	59	0.000377	23	0.000522	0.93 (0.54 - 1.62)	-0.1
ProbDam	8	32	0.000204	10	0.000227	0.83 (0.39 - 1.77)	0.15
OTULIN
Type	NumLoci	NumCont	MeanCont	NumCase	MeanCase	OR	SLP
IntronicEtc	377	10765	0.068752	3096	0.070277	1.02 (0.98 - 1.06)	0.35
FivePrime	43	166	0.00106	63	0.00143	1.24 (0.91 - 1.67)	0.79
Synonymous	64	673	0.004298	242	0.005493	1.16 (1.04 - 1.31)	2.01
SpliceRegion	20	64	0.000409	21	0.000477	1.12 (0.67 - 1.85)	0.18
ThreePrime	196	2926	0.018687	891	0.020225	1.07 (0.99 - 1.16)	1.13
ProteinAltering	130	3823	0.024416	1124	0.025514	1.03 (0.95 - 1.10)	0.3
InDel	2	1252	0.007996	390	0.008853	1.05 (0.93 - 1.19)	0.37
Disruptive	5	6	3.8e-05	3	6.8e-05	2.01 (0.48 - 8.37)	0.37
SpliceSite	1	0	0	1	2.3e-05		0.66
SIFT	48	170	0.001086	53	0.001203	1.11 (0.76 - 1.62)	0.22
PossDam	15	60	0.000383	16	0.000363	0.81 (0.43 - 1.53)	-0.29
ProbDam	34	66	0.000422	20	0.000454	1.04 (0.59 - 1.84)	0.05
FAM122C
Type	NumLoci	NumCont	MeanCont	NumCase	MeanCase	OR	SLP
IntronicEtc	713	20672	0.132024	5497	0.124779	1.04 (1.01 - 1.06)	2.55
FivePrime	54	1530	0.009771	473	0.010737	1.04 (0.95 - 1.14)	0.37
Synonymous	14	25	0.00016	4	9.1e-05	0.74 (0.25 - 2.18)	-0.43
SpliceRegion	7	65	0.000415	19	0.000431	1.48 (0.88 - 2.50)	0.88
ThreePrime	14	67	0.000428	13	0.000295	0.95 (0.52 - 1.75)	-0.06
ProteinAltering	49	512	0.00327	139	0.003155	1.18 (0.98 - 1.43)	1.15
InDel	1	2	1.3e-05	0	0		0
Disruptive	4	32	0.000204	8	0.000182	1.27 (0.58 - 2.81)	-0.07
SpliceSite	1	1	6e-06	0	0		0
SIFT	19	92	0.000588	19	0.000431	0.81 (0.46 - 1.42)	-0.35
PossDam	6	7	4.5e-05	2	4.5e-05	1.11 (0.22 - 5.74)	0
ProbDam	7	9	5.7e-05	3	6.8e-05	1.67 (0.41 - 6.81)	0.13
CMIP
Type	NumLoci	NumCont	MeanCont	NumCase	MeanCase	OR	SLP
IntronicEtc	1907	39015	0.249173	11523	0.261565	1.02 (1.00 - 1.04)	1.09
FivePrime	19	58	0.00037	16	0.000363	0.96 (0.54 - 1.70)	-0.05
Synonymous	236	4181	0.026702	1198	0.027194	1.02 (0.95 - 1.09)	0.25
SpliceRegion	73	2028	0.012952	586	0.013302	1.00 (0.91 - 1.10)	-0.02
ThreePrime	35	204	0.001303	63	0.00143	1.07 (0.80 - 1.44)	0.21
ProteinAltering	305	1073	0.006853	377	0.008558	1.13 (0.96 - 1.32)	0.83
InDel	3	58	0.00037	14	0.000318	0.90 (0.49 - 1.64)	-0.14
Disruptive	3	11	7e-05	4	9.1e-05	1.18 (0.51 - 2.77)	0.12
SpliceSite	1	1	6e-06	1	2.3e-05	2.64 (0.16 - 44.61)	0.41
SIFT	112	284	0.001814	103	0.002338	0.92 (0.67 - 1.28)	-0.2
PossDam	42	96	0.000613	45	0.001021	1.41 (0.93 - 2.12)	1.02
ProbDam	105	356	0.002274	134	0.003042	1.22 (0.90 - 1.67)	0.73
EIF4B
Type	NumLoci	NumCont	MeanCont	NumCase	MeanCase	OR	SLP
IntronicEtc	565	7175	0.045824	2047	0.046466	1.00 (0.95 - 1.05)	0
FivePrime	51	328	0.002095	92	0.002088	1.04 (0.82 - 1.32)	0.14
Synonymous	103	2173	0.013878	599	0.013597	0.99 (0.90 - 1.08)	-0.09
SpliceRegion	23	153	0.000977	40	0.000908	0.90 (0.63 - 1.29)	-0.25
ThreePrime	13	233	0.001488	82	0.001861	1.21 (0.93 - 1.57)	0.81
ProteinAltering	233	1178	0.007523	419	0.009511	1.14 (0.96 - 1.34)	0.92
InDel	3	62	0.000396	25	0.000567	1.38 (0.85 - 2.23)	0.75
Disruptive	5	5	3.2e-05	5	0.000113	2.49 (0.82 - 7.55)	1.32
SpliceSite	2	2	1.3e-05	0	0		0
SIFT	94	352	0.002248	127	0.002883	1.04 (0.80 - 1.35)	0.12
PossDam	48	163	0.001041	72	0.001634	1.19 (0.86 - 1.65)	0.54
ProbDam	73	302	0.001929	113	0.002565	1.12 (0.84 - 1.48)	0.37
PPP2R3B
Type	NumLoci	NumCont	MeanCont	NumCase	MeanCase	OR	SLP
IntronicEtc	924	39438	0.251874	8493	0.192786	1.02 (1.00 - 1.03)	1.08
FivePrime	49	1973	0.012601	467	0.010601	1.04 (0.93 - 1.16)	0.29
Synonymous	198	6413	0.040957	1500	0.034049	1.04 (0.99 - 1.10)	0.98
SpliceRegion	60	2934	0.018738	624	0.014164	1.05 (0.96 - 1.15)	0.62
ThreePrime	77	3593	0.022947	772	0.017524	1.01 (0.93 - 1.10)	0.12
ProteinAltering	312	2581	0.016484	572	0.012984	1.11 (0.99 - 1.24)	1.2
InDel	9	42	0.000268	13	0.000295	1.57 (0.83 - 2.96)	0.81
Disruptive	15	53	0.000338	9	0.000204	0.87 (0.42 - 1.79)	-0.16
SpliceSite	8	9	5.7e-05	7	0.000159	2.38 (1.04 - 5.47)	1.21
SIFT	156	853	0.005448	179	0.004063	0.87 (0.67 - 1.13)	-0.55
PossDam	50	232	0.001482	43	0.000976	0.94 (0.63 - 1.40)	-0.13
ProbDam	55	259	0.001654	60	0.001362	1.17 (0.80 - 1.69)	0.39
HNRNPAB
Type	NumLoci	NumCont	MeanCont	NumCase	MeanCase	OR	SLP
IntronicEtc	365	8452	0.053979	2383	0.054093	0.99 (0.94 - 1.04)	-0.23
FivePrime	27	282	0.001801	82	0.001861	1.00 (0.78 - 1.29)	0
Synonymous	80	723	0.004618	213	0.004835	1.02 (0.88 - 1.19)	0.12
SpliceRegion	30	747	0.004771	199	0.004517	0.98 (0.84 - 1.15)	-0.08
ThreePrime	47	1542	0.009848	442	0.010033	1.00 (0.90 - 1.12)	0.02
ProteinAltering	155	1391	0.008884	472	0.010714	1.16 (0.95 - 1.42)	0.84
InDel	13	83	0.00053	30	0.000681	1.33 (0.86 - 2.04)	0.72
Disruptive	12	13	8.3e-05	3	6.8e-05	0.84 (0.23 - 3.07)	0
SpliceSite	2	2	1.3e-05	1	2.3e-05	1.52 (0.13 - 18.07)	0.28
SIFT	56	462	0.002951	168	0.003814	1.08 (0.82 - 1.41)	0.23
PossDam	50	261	0.001667	99	0.002247	1.12 (0.83 - 1.52)	0.35
ProbDam	34	540	0.003449	172	0.003904	1.01 (0.77 - 1.31)	0.02
PREB
Type	NumLoci	NumCont	MeanCont	NumCase	MeanCase	OR	SLP
IntronicEtc	308	9406	0.060072	2653	0.060222	1.01 (0.96 - 1.05)	0.11
FivePrime	102	1088	0.006949	323	0.007332	1.00 (0.88 - 1.13)	0
Synonymous	86	1477	0.009433	434	0.009852	1.05 (0.93 - 1.17)	0.37
SpliceRegion	19	58	0.00037	9	0.000204	0.57 (0.28 - 1.18)	-0.92
ThreePrime	39	213	0.00136	61	0.001385	1.01 (0.75 - 1.35)	0.02
ProteinAltering	166	1370	0.00875	458	0.010396	1.12 (0.93 - 1.34)	0.65
InDel	2	19	0.000121	4	9.1e-05	0.54 (0.18 - 1.65)	-0.1
Disruptive	10	15	9.6e-05	7	0.000159	1.53 (0.60 - 3.91)	0.52
SpliceSite	9	45	0.000287	19	0.000431	1.65 (0.95 - 2.87)	1.14
SIFT	66	796	0.005084	274	0.00622	1.07 (0.77 - 1.48)	0.16
PossDam	40	278	0.001775	81	0.001839	0.89 (0.63 - 1.25)	-0.31
ProbDam	42	515	0.003289	190	0.004313	1.12 (0.79 - 1.59)	0.28
PEX12
Type	NumLoci	NumCont	MeanCont	NumCase	MeanCase	OR	SLP
IntronicEtc	68	1440	0.009197	392	0.008898	0.96 (0.86 - 1.08)	-0.28
FivePrime	19	64	0.000409	22	0.000499	1.25 (0.76 - 2.07)	0.43
Synonymous	48	521	0.003327	146	0.003314	1.01 (0.84 - 1.22)	0.04
SpliceRegion	3	3	1.9e-05	4	9.1e-05	4.22 (0.90 - 19.75)	1.34
ThreePrime	28	74	0.000473	21	0.000477	0.98 (0.59 - 1.62)	-0.02
ProteinAltering	127	3598	0.022979	1087	0.024674	1.07 (0.94 - 1.20)	0.54
InDel	7	24	0.000153	8	0.000182	1.15 (0.50 - 2.63)	0.17
Disruptive	29	127	0.000811	53	0.001203	1.50 (1.08 - 2.09)	1.84
SpliceSite	3	384	0.002452	125	0.002837	1.16 (0.94 - 1.43)	0.78
SIFT	64	2346	0.014983	718	0.016298	1.01 (0.84 - 1.21)	0.03
PossDam	30	1445	0.009229	435	0.009874	0.98 (0.82 - 1.18)	-0.06
ProbDam	36	198	0.001265	73	0.001657	1.22 (0.90 - 1.66)	0.7
FAM167A
Type	NumLoci	NumCont	MeanCont	NumCase	MeanCase	OR	SLP
IntronicEtc	356	6547	0.041813	1918	0.043537	1.03 (0.98 - 1.09)	0.75
FivePrime	150	3873	0.024735	1075	0.024402	1.00 (0.93 - 1.07)	-0.04
Synonymous	75	1010	0.00645	287	0.006515	0.99 (0.87 - 1.14)	-0.05
SpliceRegion	7	87	0.000556	24	0.000545	1.02 (0.64 - 1.63)	0.03
ThreePrime	54	249	0.00159	80	0.001816	1.18 (0.91 - 1.53)	0.67
ProteinAltering	150	3593	0.022947	1022	0.023199	1.00 (0.93 - 1.08)	-0.02
InDel	1	1	6e-06	0	0		0
Disruptive	18	59	0.000377	27	0.000613	1.69 (1.05 - 2.71)	1.58
SpliceSite	2	8	5.1e-05	3	6.8e-05	1.38 (0.35 - 5.42)	0.15
SIFT	68	276	0.001763	107	0.002429	1.14 (0.77 - 1.71)	0.3
PossDam	15	76	0.000485	23	0.000522	1.02 (0.58 - 1.81)	0.03
ProbDam	49	208	0.001328	85	0.001929	1.29 (0.85 - 1.97)	0.64
ABCG5
Type	NumLoci	NumCont	MeanCont	NumCase	MeanCase	OR	SLP
IntronicEtc	887	13046	0.083319	3818	0.086666	1.02 (0.99 - 1.06)	0.69
FivePrime	50	230	0.001469	60	0.001362	0.90 (0.67 - 1.21)	-0.31
Synonymous	149	1710	0.010921	504	0.011441	1.00 (0.90 - 1.10)	-0.03
SpliceRegion	48	307	0.001961	127	0.002883	1.55 (1.25 - 1.92)	4.31
ThreePrime	5	7	4.5e-05	1	2.3e-05	0.49 (0.06 - 4.28)	0
ProteinAltering	358	7364	0.047031	2232	0.050665	1.03 (0.98 - 1.10)	0.61
InDel	1	1	6e-06	0	0		0
Disruptive	35	131	0.000837	42	0.000953	1.17 (0.82 - 1.68)	0.42
SpliceSite	8	33	0.000211	12	0.000272	1.37 (0.69 - 2.71)	0.33
SIFT	201	2306	0.014727	739	0.016775	1.12 (0.92 - 1.36)	0.61
PossDam	71	933	0.005959	275	0.006242	0.89 (0.71 - 1.11)	-0.53
ProbDam	108	998	0.006374	338	0.007672	1.03 (0.83 - 1.29)	0.12
ABCD1
Type	NumLoci	NumCont	MeanCont	NumCase	MeanCase	OR	SLP
IntronicEtc	305	5657	0.036129	1482	0.033641	1.07 (1.01 - 1.13)	2
FivePrime	19	123	0.000786	26	0.00059	0.90 (0.58 - 1.38)	-0.21
Synonymous	125	1802	0.011509	490	0.011123	1.05 (0.96 - 1.15)	0.57
SpliceRegion	13	69	0.000441	18	0.000409	1.26 (0.74 - 2.14)	0.41
ThreePrime	27	66	0.000422	17	0.000386	1.26 (0.73 - 2.19)	0.4
ProteinAltering	201	2200	0.014051	615	0.01396	1.02 (0.94 - 1.12)	0.24
InDel	3	10	6.4e-05	1	2.3e-05	0.51 (0.08 - 3.47)	-0.32
Disruptive	3	4	2.6e-05	1	2.3e-05	0.86 (0.13 - 5.62)	0
SpliceSite	1	1	6e-06	0	0		0
SIFT	78	338	0.002159	85	0.001929	0.88 (0.60 - 1.28)	-0.31
PossDam	32	187	0.001194	56	0.001271	1.51 (1.06 - 2.17)	1.69
ProbDam	53	237	0.001514	64	0.001453	1.40 (0.93 - 2.09)	1
PRAF2
Type	NumLoci	NumCont	MeanCont	NumCase	MeanCase	OR	SLP
IntronicEtc	58	271	0.001731	85	0.001929	1.55 (1.21 - 2.00)	3.33
FivePrime	3	6	3.8e-05	1	2.3e-05	0.85 (0.10 - 7.34)	0
Synonymous	20	763	0.004873	198	0.004494	0.97 (0.85 - 1.11)	-0.16
SpliceRegion	5	9	5.7e-05	3	6.8e-05	1.70 (0.45 - 6.46)	0.13
ThreePrime	18	618	0.003947	231	0.005244	1.28 (1.12 - 1.45)	3.72
ProteinAltering	44	2066	0.013195	566	0.012848	0.99 (0.92 - 1.07)	-0.07
InDel	1	1	6e-06	0	0		0
Disruptive	5	6	3.8e-05	0	0		-0.46
SpliceSite	2	2	1.3e-05	1	2.3e-05	2.66 (0.23 - 30.84)	0.28
SIFT	25	58	0.00037	17	0.000386	0.93 (0.42 - 2.07)	-0.07
PossDam	9	16	0.000102	9	0.000204	3.07 (1.03 - 9.14)	1.03
ProbDam	9	13	8.3e-05	3	6.8e-05	1.24 (0.29 - 5.34)	0
CTHRC1
Type	NumLoci	NumCont	MeanCont	NumCase	MeanCase	OR	SLP
IntronicEtc	205	4297	0.027443	1206	0.027375	1.00 (0.94 - 1.06)	-0.01
FivePrime	35	120	0.000766	42	0.000953	1.16 (0.81 - 1.67)	0.38
Synonymous	36	1398	0.008928	433	0.009829	1.10 (0.98 - 1.23)	1.04
SpliceRegion	7	63	0.000402	20	0.000454	1.17 (0.70 - 1.97)	0.26
ThreePrime	15	473	0.003021	126	0.00286	0.97 (0.79 - 1.19)	-0.11
ProteinAltering	116	969	0.006189	350	0.007945	1.28 (1.10 - 1.50)	2.94
InDel	6	251	0.001603	67	0.001521	0.95 (0.72 - 1.26)	-0.15
Disruptive	13	23	0.000147	9	0.000204	1.23 (0.55 - 2.72)	0.4
SpliceSite	4	23	0.000147	7	0.000159	1.16 (0.48 - 2.77)	0.08
SIFT	56	289	0.001846	106	0.002406	0.96 (0.65 - 1.41)	-0.08
PossDam	15	36	0.00023	16	0.000363	1.30 (0.69 - 2.45)	0.38
ProbDam	36	195	0.001245	73	0.001657	1.06 (0.69 - 1.64)	0.11
SLC25A37
Type	NumLoci	NumCont	MeanCont	NumCase	MeanCase	OR	SLP
IntronicEtc	308	2567	0.016394	827	0.018772	1.08 (1.00 - 1.17)	1.36
FivePrime	31	119	0.00076	36	0.000817	1.06 (0.72 - 1.56)	0.13
Synonymous	85	2063	0.013176	590	0.013393	1.03 (0.94 - 1.14)	0.3
SpliceRegion	10	57	0.000364	26	0.00059	1.72 (1.06 - 2.77)	1.61
ThreePrime	32	117	0.000747	42	0.000953	1.27 (0.88 - 1.83)	0.73
ProteinAltering	153	771	0.004924	249	0.005652	1.08 (0.88 - 1.32)	0.34
InDel	0	0	0	0	0		0
Disruptive	6	12	7.7e-05	8	0.000182	2.37 (0.94 - 5.97)	1.22
SpliceSite	1	2	1.3e-05	0	0		0
SIFT	68	146	0.000932	59	0.001339	1.52 (1.02 - 2.27)	1.43
PossDam	26	131	0.000837	34	0.000772	0.67 (0.41 - 1.08)	-1.02
ProbDam	38	207	0.001322	77	0.001748	1.11 (0.78 - 1.59)	0.26
CT62
Type	NumLoci	NumCont	MeanCont	NumCase	MeanCase	OR	SLP
IntronicEtc	51	495	0.003161	144	0.003269	0.98 (0.81 - 1.19)	-0.07
FivePrime	2	0	0	3	6.8e-05		1.98
Synonymous	18	1380	0.008813	424	0.009625	1.11 (0.99 - 1.24)	1.19
SpliceRegion	4	62	0.000396	17	0.000386	1.04 (0.60 - 1.81)	0.05
ThreePrime	18	446	0.002848	125	0.002837	1.00 (0.81 - 1.23)	-0.01
ProteinAltering	58	191	0.00122	68	0.001544	1.31 (0.89 - 1.92)	0.8
InDel	1	0	0	1	2.3e-05		0.66
Disruptive	3	96	0.000613	40	0.000908	1.55 (1.06 - 2.27)	1.67
SpliceSite	2	131	0.000837	55	0.001248	1.51 (1.09 - 2.09)	1.94
SIFT	29	97	0.000619	26	0.00059	0.73 (0.39 - 1.39)	-0.48
PossDam	9	32	0.000204	10	0.000227	1.04 (0.44 - 2.47)	0.15
ProbDam	5	8	5.1e-05	1	2.3e-05	0.51 (0.06 - 4.63)	-0.16
L1TD1
Type	NumLoci	NumCont	MeanCont	NumCase	MeanCase	OR	SLP
IntronicEtc	46	765	0.004886	210	0.004767	0.95 (0.81 - 1.11)	-0.31
FivePrime	21	117	0.000747	33	0.000749	0.97 (0.65 - 1.44)	-0.06
Synonymous	166	5745	0.036691	1639	0.037204	0.97 (0.91 - 1.02)	-0.6
SpliceRegion	4	4	2.6e-05	1	2.3e-05	0.52 (0.05 - 5.07)	0
ThreePrime	48	397	0.002535	136	0.003087	1.13 (0.92 - 1.39)	0.6
ProteinAltering	413	3719	0.023752	1140	0.025877	1.10 (1.01 - 1.20)	1.67
InDel	26	150	0.000958	51	0.001158	1.11 (0.79 - 1.56)	0.28
Disruptive	91	358	0.002286	141	0.003201	1.37 (1.12 - 1.67)	2.71
SpliceSite	0	0	0	0	0		0
SIFT	138	963	0.00615	278	0.00631	0.90 (0.75 - 1.09)	-0.56
PossDam	90	582	0.003717	191	0.004336	1.11 (0.90 - 1.36)	0.49
ProbDam	69	231	0.001475	61	0.001385	0.89 (0.64 - 1.24)	-0.32
PIK3R6
Type	NumLoci	NumCont	MeanCont	NumCase	MeanCase	OR	SLP
IntronicEtc	755	24310	0.155258	7193	0.163277	1.01 (0.99 - 1.04)	0.51
FivePrime	17	75	0.000479	24	0.000545	1.08 (0.67 - 1.75)	0.13
Synonymous	166	2857	0.018246	848	0.019249	1.03 (0.95 - 1.12)	0.31
SpliceRegion	57	3009	0.019217	832	0.018886	0.99 (0.92 - 1.07)	-0.07
ThreePrime	28	1357	0.008667	427	0.009693	1.01 (0.90 - 1.13)	0.03
ProteinAltering	379	7115	0.045441	2198	0.049893	1.01 (0.94 - 1.09)	0.12
InDel	2	9	5.7e-05	3	6.8e-05	1.24 (0.32 - 4.78)	0.13
Disruptive	34	217	0.001386	65	0.001475	1.08 (0.81 - 1.43)	0.21
SpliceSite	14	232	0.001482	79	0.001793	1.16 (0.89 - 1.50)	0.56
SIFT	191	3173	0.020265	1011	0.022949	0.96 (0.83 - 1.11)	-0.25
PossDam	73	318	0.002031	112	0.002542	1.15 (0.90 - 1.48)	0.58
ProbDam	135	3069	0.0196	992	0.022518	1.18 (1.02 - 1.38)	1.6
FOXO3B
Type	NumLoci	NumCont	MeanCont	NumCase	MeanCase	OR	SLP
IntronicEtc	37	3291	0.021018	946	0.021474	1.00 (0.93 - 1.08)	0.05
FivePrime	0	0	0	0	0		0
Synonymous	10	261	0.001667	64	0.001453	0.86 (0.64 - 1.13)	-0.57
SpliceRegion	1	4	2.6e-05	0	0		-0.23
ThreePrime	0	0	0	0	0		0
ProteinAltering	44	233	0.001488	87	0.001975	1.25 (0.91 - 1.71)	0.81
InDel	5	760	0.004854	250	0.005675	1.15 (0.98 - 1.36)	1.11
Disruptive	3	11	7e-05	8	0.000182	2.81 (1.09 - 7.24)	1.32
SpliceSite	0	0	0	0	0		0
SIFT	19	67	0.000428	30	0.000681	0.80 (0.40 - 1.59)	-0.28
PossDam	1	1	6e-06	0	0		0
ProbDam	5	27	0.000172	17	0.000386	2.24 (0.95 - 5.30)	1.79
FAM47A
Type	NumLoci	NumCont	MeanCont	NumCase	MeanCase	OR	SLP
IntronicEtc	0	0	0	0	0		0
FivePrime	10	20	0.000128	3	6.8e-05	0.78 (0.24 - 2.58)	-0.35
Synonymous	126	3967	0.025336	1050	0.023834	1.01 (0.95 - 1.07)	0.16
SpliceRegion	0	0	0	0	0		0
ThreePrime	8	39	0.000249	5	0.000113	0.65 (0.25 - 1.65)	-0.99
ProteinAltering	267	4278	0.027322	1259	0.028579	1.09 (1.02 - 1.16)	2.19
InDel	6	27	0.000172	4	9.1e-05	0.75 (0.26 - 2.19)	-0.55
Disruptive	5	7	4.5e-05	1	2.3e-05	0.74 (0.09 - 6.28)	0
SpliceSite	0	0	0	0	0		0
SIFT	71	491	0.003136	125	0.002837	0.92 (0.77 - 1.11)	-0.41
PossDam	69	350	0.002235	97	0.002202	1.12 (0.90 - 1.40)	0.52
ProbDam	42	371	0.002369	116	0.002633	1.17 (0.95 - 1.43)	0.89
MIR6806
Type	NumLoci	NumCont	MeanCont	NumCase	MeanCase	OR	SLP
IntronicEtc	1	3	1.9e-05	1	2.3e-05	1.40 (0.14 - 14.47)	0
FivePrime	0	0	0	0	0		0
Synonymous	0	0	0	0	0		0
SpliceRegion	0	0	0	0	0		0
ThreePrime	0	0	0	0	0		0
ProteinAltering	0	0	0	0	0		0
InDel	0	0	0	0	0		0
Disruptive	0	0	0	0	0		0
SpliceSite	0	0	0	0	0		0
SIFT	0	0	0	0	0		0
PossDam	0	0	0	0	0		0
ProbDam	0	0	0	0	0		0
GCK
Type	NumLoci	NumCont	MeanCont	NumCase	MeanCase	OR	SLP
IntronicEtc	483	8069	0.051533	2496	0.056658	1.08 (1.03 - 1.13)	2.72
FivePrime	58	805	0.005141	272	0.006174	1.03 (0.89 - 1.19)	0.17
Synonymous	111	3841	0.024531	1042	0.023653	0.97 (0.91 - 1.04)	-0.36
SpliceRegion	34	1548	0.009886	394	0.008944	0.91 (0.82 - 1.02)	-0.95
ThreePrime	32	1263	0.008066	370	0.008399	1.06 (0.94 - 1.19)	0.47
ProteinAltering	121	640	0.004087	207	0.004699	1.23 (0.99 - 1.52)	1.28
InDel	2	5	3.2e-05	1	2.3e-05	0.72 (0.08 - 6.51)	0
Disruptive	8	7	4.5e-05	7	0.000159	3.99 (1.35 - 11.77)	1.71
SpliceSite	7	5	3.2e-05	3	6.8e-05	1.89 (0.43 - 8.41)	0.41
SIFT	70	267	0.001705	80	0.001816	0.76 (0.50 - 1.16)	-0.71
PossDam	20	81	0.000517	18	0.000409	0.80 (0.44 - 1.47)	-0.32
ProbDam	44	116	0.000741	46	0.001044	1.50 (0.92 - 2.45)	1.01
MAPKAPK2
Type	NumLoci	NumCont	MeanCont	NumCase	MeanCase	OR	SLP
IntronicEtc	493	7139	0.045594	2061	0.046783	1.00 (0.95 - 1.06)	0.04
FivePrime	0	0	0	0	0		0
Synonymous	77	536	0.003423	197	0.004472	1.27 (1.07 - 1.50)	2.26
SpliceRegion	27	1032	0.006591	308	0.006991	1.04 (0.95 - 1.14)	0.38
ThreePrime	28	1055	0.006738	331	0.007514	1.10 (0.96 - 1.27)	0.84
ProteinAltering	106	1241	0.007926	526	0.01194	1.01 (0.79 - 1.30)	0.04
InDel	7	1103	0.007044	336	0.007627	1.10 (0.97 - 1.25)	0.9
Disruptive	4	4	2.6e-05	0	0		-0.23
SpliceSite	1	1	6e-06	0	0		0
SIFT	44	356	0.002274	123	0.002792	1.07 (0.79 - 1.46)	0.18
PossDam	13	682	0.004356	347	0.007877	1.10 (0.84 - 1.44)	0.33
ProbDam	25	42	0.000268	20	0.000454	1.58 (0.87 - 2.89)	0.9
HLA-A
Type	NumLoci	NumCont	MeanCont	NumCase	MeanCase	OR	SLP
IntronicEtc	274	38231	0.244166	11208	0.254415	1.00 (0.99 - 1.02)	0.18
FivePrime	29	2714	0.017333	827	0.018772	1.02 (0.94 - 1.11)	0.21
Synonymous	120	13896	0.088748	3971	0.090139	0.99 (0.96 - 1.03)	-0.13
SpliceRegion	28	911	0.005818	298	0.006764	1.07 (0.94 - 1.23)	0.53
ThreePrime	43	11950	0.07632	3525	0.080015	0.99 (0.96 - 1.02)	-0.35
ProteinAltering	291	17111	0.109281	5177	0.117515	1.04 (0.98 - 1.11)	0.82
InDel	0	0	0	0	0		0
Disruptive	18	3289	0.021006	991	0.022495	1.03 (0.97 - 1.09)	0.42
SpliceSite	6	35	0.000224	10	0.000227	1.02 (0.49 - 2.12)	0
SIFT	212	11310	0.072232	3434	0.07795	0.97 (0.90 - 1.04)	-0.42
PossDam	53	1863	0.011898	646	0.014664	1.07 (0.97 - 1.19)	0.8
ProbDam	114	2721	0.017378	839	0.019045	1.05 (0.97 - 1.14)	0.61
PCSK9
Type	NumLoci	NumCont	MeanCont	NumCase	MeanCase	OR	SLP
IntronicEtc	460	5317	0.033958	1540	0.034957	1.02 (0.96 - 1.08)	0.31
FivePrime	30	269	0.001718	78	0.001771	1.03 (0.80 - 1.34)	0.1
Synonymous	166	7230	0.046175	2145	0.04869	1.02 (0.97 - 1.07)	0.4
SpliceRegion	38	291	0.001858	90	0.002043	1.04 (0.81 - 1.33)	0.12
ThreePrime	26	2418	0.015443	707	0.016048	1.02 (0.94 - 1.12)	0.24
ProteinAltering	374	3388	0.021638	831	0.018863	0.96 (0.86 - 1.06)	-0.44
InDel	4	4	2.6e-05	3	6.8e-05	1.81 (0.39 - 8.48)	0.74
Disruptive	33	202	0.00129	29	0.000658	0.51 (0.34 - 0.77)	-3.05
SpliceSite	11	179	0.001143	14	0.000318	0.29 (0.17 - 0.51)	-5.08
SIFT	163	1404	0.008967	279	0.006333	0.59 (0.45 - 0.77)	-4
PossDam	47	249	0.00159	68	0.001544	1.19 (0.88 - 1.61)	0.6
ProbDam	110	1050	0.006706	227	0.005153	1.29 (0.96 - 1.74)	1.1
IFITM5
Type	NumLoci	NumCont	MeanCont	NumCase	MeanCase	OR	SLP
IntronicEtc	58	786	0.00502	226	0.00513	1.01 (0.86 - 1.17)	0.02
FivePrime	13	1376	0.008788	531	0.012053	1.01 (0.90 - 1.12)	0.04
Synonymous	45	1169	0.007466	301	0.006833	0.89 (0.78 - 1.02)	-1.1
SpliceRegion	1	1	6e-06	0	0		0
ThreePrime	33	188	0.001201	32	0.000726	0.62 (0.42 - 0.91)	-1.87
ProteinAltering	85	699	0.004464	145	0.003291	0.83 (0.66 - 1.05)	-0.93
InDel	1	125	0.000798	29	0.000658	0.81 (0.53 - 1.22)	-0.52
Disruptive	6	64	0.000409	18	0.000409	1.02 (0.59 - 1.74)	0.02
SpliceSite	1	6	3.8e-05	1	2.3e-05	0.55 (0.06 - 4.88)	0
SIFT	35	335	0.00214	55	0.001248	0.87 (0.53 - 1.41)	-0.25
PossDam	13	146	0.000932	18	0.000409	0.56 (0.30 - 1.06)	-1.15
ProbDam	15	108	0.00069	18	0.000409	0.85 (0.43 - 1.69)	-0.2
LOC102723729
Type	NumLoci	NumCont	MeanCont	NumCase	MeanCase	OR	SLP
IntronicEtc	345	3629	0.023177	905	0.020543	0.85 (0.79 - 0.92)	-4.67
FivePrime	0	0	0	0	0		0
Synonymous	0	0	0	0	0		0
SpliceRegion	1	2	1.3e-05	1	2.3e-05	1.55 (0.13 - 18.39)	0.28
ThreePrime	0	0	0	0	0		0
ProteinAltering	0	0	0	0	0		0
InDel	0	0	0	0	0		0
Disruptive	0	0	0	0	0		0
SpliceSite	1	1	6e-06	0	0		0
SIFT	0	0	0	0	0		0
PossDam	0	0	0	0	0		0
ProbDam	0	0	0	0	0		0
ANGPTL3
Type	NumLoci	NumCont	MeanCont	NumCase	MeanCase	OR	SLP
IntronicEtc	229	3368	0.02151	1093	0.02481	1.04 (0.95 - 1.13)	0.36
FivePrime	20	1611	0.010289	505	0.011463	1.02 (0.83 - 1.25)	0.06
Synonymous	67	1936	0.012364	593	0.013461	0.97 (0.81 - 1.15)	-0.14
SpliceRegion	9	346	0.00221	59	0.001339	0.62 (0.47 - 0.83)	-3.05
ThreePrime	19	878	0.005607	237	0.00538	0.98 (0.84 - 1.13)	-0.11
ProteinAltering	182	4543	0.029014	1175	0.026672	0.96 (0.83 - 1.11)	-0.25
InDel	4	30	0.000192	9	0.000204	0.98 (0.45 - 2.13)	0.07
Disruptive	34	340	0.002171	57	0.001294	0.60 (0.45 - 0.80)	-3.47
SpliceSite	4	10	6.4e-05	2	4.5e-05	0.70 (0.15 - 3.37)	0
SIFT	94	3000	0.01916	751	0.017047	0.91 (0.76 - 1.08)	-0.58
PossDam	28	3322	0.021216	845	0.019181	1.03 (0.84 - 1.27)	0.1
ProbDam	50	307	0.001961	80	0.001816	1.01 (0.73 - 1.41)	0.03
APOC3
Type	NumLoci	NumCont	MeanCont	NumCase	MeanCase	OR	SLP
IntronicEtc	85	4459	0.028478	1193	0.02708	0.91 (0.84 - 0.99)	-1.73
FivePrime	1	0	0	1	2.3e-05		0.66
Synonymous	23	96	0.000613	23	0.000522	0.89 (0.56 - 1.43)	-0.2
SpliceRegion	8	43	0.000275	10	0.000227	0.81 (0.40 - 1.64)	-0.27
ThreePrime	24	84	0.000536	20	0.000454	0.86 (0.52 - 1.42)	-0.26
ProteinAltering	46	253	0.001616	48	0.00109	0.81 (0.48 - 1.36)	-0.39
InDel	2	19	0.000121	3	6.8e-05	0.55 (0.16 - 1.93)	-0.35
Disruptive	5	93	0.000594	29	0.000658	1.10 (0.72 - 1.70)	0.19
SpliceSite	5	746	0.004764	155	0.003518	0.72 (0.60 - 0.86)	-3.61
SIFT	18	179	0.001143	32	0.000726	0.93 (0.30 - 2.85)	-0.05
PossDam	8	19	0.000121	5	0.000113	1.07 (0.27 - 4.28)	0
ProbDam	6	140	0.000894	23	0.000522	0.76 (0.25 - 2.32)	-0.21
PPP1R3G
Type	NumLoci	NumCont	MeanCont	NumCase	MeanCase	OR	SLP
IntronicEtc	0	0	0	0	0		0
FivePrime	1	1	6e-06	0	0		0
Synonymous	109	3917	0.025016	1037	0.023539	0.94 (0.87 - 1.01)	-1.16
SpliceRegion	0	0	0	0	0		0
ThreePrime	21	131	0.000837	42	0.000953	1.12 (0.78 - 1.61)	0.28
ProteinAltering	202	1230	0.007856	300	0.00681	0.94 (0.80 - 1.09)	-0.41
InDel	5	16	0.000102	6	0.000136	1.35 (0.51 - 3.59)	0.22
Disruptive	19	90	0.000575	8	0.000182	0.29 (0.14 - 0.61)	-3.06
SpliceSite	0	0	0	0	0		0
SIFT	91	427	0.002727	102	0.002315	1.03 (0.77 - 1.37)	0.07
PossDam	37	228	0.001456	51	0.001158	0.84 (0.59 - 1.20)	-0.47
ProbDam	26	61	0.00039	9	0.000204	0.52 (0.25 - 1.11)	-1.08
LOC107985474
Type	NumLoci	NumCont	MeanCont	NumCase	MeanCase	OR	SLP
IntronicEtc	84	797	0.00509	161	0.003655	0.72 (0.60 - 0.85)	-3.84
FivePrime	0	0	0	0	0		0
Synonymous	0	0	0	0	0		0
SpliceRegion	0	0	0	0	0		0
ThreePrime	0	0	0	0	0		0
ProteinAltering	0	0	0	0	0		0
InDel	0	0	0	0	0		0
Disruptive	0	0	0	0	0		0
SpliceSite	0	0	0	0	0		0
SIFT	0	0	0	0	0		0
PossDam	0	0	0	0	0		0
ProbDam	0	0	0	0	0		0
TBC1D8
Type	NumLoci	NumCont	MeanCont	NumCase	MeanCase	OR	SLP
IntronicEtc	1070	23138	0.147773	6582	0.149408	0.99 (0.97 - 1.02)	-0.17
FivePrime	33	175	0.001118	49	0.001112	0.94 (0.68 - 1.31)	-0.15
Synonymous	253	4721	0.030151	1313	0.029804	0.96 (0.90 - 1.02)	-0.77
SpliceRegion	54	656	0.00419	158	0.003587	0.83 (0.69 - 0.99)	-1.45
ThreePrime	34	157	0.001003	34	0.000772	0.80 (0.55 - 1.17)	-0.62
ProteinAltering	509	5042	0.032201	1241	0.02817	0.88 (0.78 - 0.98)	-1.71
InDel	7	1472	0.009401	412	0.009352	1.04 (0.90 - 1.20)	0.2
Disruptive	45	132	0.000843	30	0.000681	0.80 (0.54 - 1.21)	-0.55
SpliceSite	6	74	0.000473	20	0.000454	1.01 (0.61 - 1.68)	0.02
SIFT	259	1852	0.011828	467	0.010601	1.03 (0.88 - 1.21)	0.17
PossDam	80	1043	0.006661	260	0.005902	1.01 (0.84 - 1.22)	0.05
ProbDam	271	2312	0.014766	580	0.013166	0.99 (0.84 - 1.18)	-0.03
CTXN2
Type	NumLoci	NumCont	MeanCont	NumCase	MeanCase	OR	SLP
IntronicEtc	6	16	0.000102	3	6.8e-05	0.74 (0.21 - 2.63)	-0.11
FivePrime	12	80	0.000511	24	0.000545	1.02 (0.64 - 1.63)	0.03
Synonymous	18	88	0.000562	24	0.000545	0.97 (0.61 - 1.56)	-0.04
SpliceRegion	5	5	3.2e-05	8	0.000182	6.48 (2.04 - 20.58)	2.63
ThreePrime	23	54	0.000345	16	0.000363	1.11 (0.62 - 1.97)	0.14
ProteinAltering	37	1047	0.006687	260	0.005902	0.76 (0.66 - 0.88)	-3.72
InDel	1	2	1.3e-05	0	0		0
Disruptive	3	9	5.7e-05	0	0		-0.66
SpliceSite	0	0	0	0	0		0
SIFT	19	40	0.000255	7	0.000159	0.85 (0.26 - 2.78)	-0.53
PossDam	6	11	7e-05	0	0		-0.86
ProbDam	14	35	0.000224	6	0.000136	0.98 (0.28 - 3.49)	-0.46
NPC1L1
Type	NumLoci	NumCont	MeanCont	NumCase	MeanCase	OR	SLP
IntronicEtc	815	13083	0.083556	3816	0.086621	1.02 (0.99 - 1.06)	0.74
FivePrime	19	372	0.002376	121	0.002747	1.20 (0.98 - 1.48)	1.12
Synonymous	314	4831	0.030854	1356	0.03078	0.98 (0.92 - 1.04)	-0.31
SpliceRegion	52	280	0.001788	55	0.001248	0.69 (0.51 - 0.93)	-1.92
ThreePrime	17	409	0.002612	130	0.002951	1.09 (0.88 - 1.33)	0.37
ProteinAltering	610	12084	0.077176	3217	0.073024	0.99 (0.96 - 1.03)	-0.22
InDel	11	25	0.00016	7	0.000159	0.98 (0.41 - 2.34)	0
Disruptive	51	181	0.001156	28	0.000636	0.55 (0.37 - 0.83)	-2.46
SpliceSite	15	100	0.000639	19	0.000431	0.69 (0.42 - 1.15)	-0.84
SIFT	339	3853	0.024608	953	0.021633	0.89 (0.76 - 1.04)	-0.85
PossDam	99	2551	0.016292	609	0.013824	0.95 (0.81 - 1.12)	-0.27
ProbDam	218	1220	0.007792	332	0.007536	1.08 (0.89 - 1.32)	0.37
ANGPTL4
Type	NumLoci	NumCont	MeanCont	NumCase	MeanCase	OR	SLP
IntronicEtc	244	5860	0.037425	1708	0.038771	1.03 (0.97 - 1.09)	0.53
FivePrime	23	669	0.004273	188	0.004267	0.92 (0.76 - 1.12)	-0.41
Synonymous	84	3102	0.019811	889	0.02018	1.08 (0.98 - 1.18)	0.92
SpliceRegion	18	755	0.004822	207	0.004699	0.97 (0.86 - 1.09)	-0.23
ThreePrime	34	1514	0.009669	396	0.008989	0.83 (0.71 - 0.97)	-1.79
ProteinAltering	229	3985	0.025451	1082	0.024561	1.00 (0.89 - 1.12)	0
InDel	1	1	6e-06	0	0		0
Disruptive	29	219	0.001399	48	0.00109	0.79 (0.57 - 1.09)	-0.86
SpliceSite	4	28	0.000179	7	0.000159	0.79 (0.34 - 1.85)	0
SIFT	127	1674	0.010691	369	0.008376	0.63 (0.47 - 0.84)	-2.8
PossDam	37	1118	0.00714	334	0.007582	1.12 (0.94 - 1.33)	0.74
ProbDam	79	1357	0.008667	315	0.00715	1.34 (0.98 - 1.85)	1.18
SNX17
Type	NumLoci	NumCont	MeanCont	NumCase	MeanCase	OR	SLP
IntronicEtc	734	9622	0.061452	2683	0.060903	0.98 (0.94 - 1.02)	-0.47
FivePrime	57	1962	0.01253	550	0.012485	1.00 (0.91 - 1.10)	0.01
Synonymous	106	1479	0.009446	421	0.009556	1.00 (0.89 - 1.12)	0.01
SpliceRegion	50	2202	0.014063	587	0.013325	0.95 (0.87 - 1.05)	-0.48
ThreePrime	57	969	0.006189	208	0.004721	0.74 (0.63 - 0.87)	-3.86
ProteinAltering	201	5676	0.03625	1481	0.033618	1.02 (0.85 - 1.21)	0.07
InDel	3	7	4.5e-05	0	0		-0.44
Disruptive	11	13	8.3e-05	5	0.000113	1.37 (0.47 - 3.97)	0.24
SpliceSite	6	5	3.2e-05	2	4.5e-05	1.52 (0.28 - 8.27)	0.19
SIFT	85	5006	0.031971	1295	0.029396	0.93 (0.76 - 1.13)	-0.34
PossDam	37	218	0.001392	48	0.00109	0.79 (0.56 - 1.12)	-0.75
ProbDam	44	2734	0.017461	701	0.015912	0.97 (0.86 - 1.10)	-0.18
LOC105377994
Type	NumLoci	NumCont	MeanCont	NumCase	MeanCase	OR	SLP
IntronicEtc	193	1060	0.00677	238	0.005402	0.78 (0.68 - 0.90)	-3.21
FivePrime	0	0	0	0	0		0
Synonymous	0	0	0	0	0		0
SpliceRegion	0	0	0	0	0		0
ThreePrime	0	0	0	0	0		0
ProteinAltering	0	0	0	0	0		0
InDel	0	0	0	0	0		0
Disruptive	0	0	0	0	0		0
SpliceSite	0	0	0	0	0		0
SIFT	0	0	0	0	0		0
PossDam	0	0	0	0	0		0
ProbDam	0	0	0	0	0		0
LOC101929609
Type	NumLoci	NumCont	MeanCont	NumCase	MeanCase	OR	SLP
IntronicEtc	5	18	0.000115	0	0		-1.71
FivePrime	0	0	0	0	0		0
Synonymous	0	0	0	0	0		0
SpliceRegion	0	0	0	0	0		0
ThreePrime	0	0	0	0	0		0
ProteinAltering	0	0	0	0	0		0
InDel	0	0	0	0	0		0
Disruptive	0	0	0	0	0		0
SpliceSite	0	0	0	0	0		0
SIFT	0	0	0	0	0		0
PossDam	0	0	0	0	0		0
ProbDam	0	0	0	0	0		0
SV2B
Type	NumLoci	NumCont	MeanCont	NumCase	MeanCase	OR	SLP
IntronicEtc	477	10878	0.069473	3063	0.069528	0.96 (0.92 - 1.00)	-1.46
FivePrime	22	2387	0.015245	679	0.015413	1.01 (0.92 - 1.10)	0.08
Synonymous	133	2794	0.017844	872	0.019794	1.08 (0.98 - 1.18)	0.97
SpliceRegion	30	1573	0.010046	431	0.009783	0.99 (0.88 - 1.10)	-0.1
ThreePrime	34	256	0.001635	50	0.001135	0.67 (0.49 - 0.91)	-2.02
ProteinAltering	274	2251	0.014376	561	0.012734	0.92 (0.78 - 1.08)	-0.55
InDel	1	3	1.9e-05	2	4.5e-05	2.17 (0.34 - 13.88)	0.52
Disruptive	13	19	0.000121	5	0.000113	0.98 (0.35 - 2.69)	0
SpliceSite	5	8	5.1e-05	0	0		-0.67
SIFT	133	991	0.006329	225	0.005107	0.82 (0.65 - 1.03)	-1.08
PossDam	56	675	0.004311	174	0.00395	1.07 (0.85 - 1.33)	0.24
ProbDam	94	537	0.00343	130	0.002951	1.12 (0.85 - 1.48)	0.38
ITM2B
Type	NumLoci	NumCont	MeanCont	NumCase	MeanCase	OR	SLP
IntronicEtc	168	1560	0.009963	388	0.008807	0.89 (0.79 - 1.00)	-1.28
FivePrime	39	414	0.002644	118	0.002679	0.97 (0.79 - 1.20)	-0.09
Synonymous	49	2199	0.014044	650	0.014755	0.94 (0.86 - 1.03)	-0.72
SpliceRegion	10	11	7e-05	1	2.3e-05	0.28 (0.03 - 2.30)	-0.32
ThreePrime	17	65	0.000415	8	0.000182	0.40 (0.19 - 0.86)	-1.8
ProteinAltering	98	926	0.005914	213	0.004835	0.81 (0.69 - 0.96)	-1.86
InDel	3	19	0.000121	4	9.1e-05	0.79 (0.26 - 2.41)	-0.1
Disruptive	9	12	7.7e-05	1	2.3e-05	0.31 (0.04 - 2.51)	-0.49
SpliceSite	1	1	6e-06	0	0		0
SIFT	41	105	0.000671	27	0.000613	0.87 (0.44 - 1.69)	-0.17
PossDam	13	20	0.000128	2	4.5e-05	0.47 (0.10 - 2.19)	-0.7
ProbDam	23	84	0.000536	27	0.000613	1.52 (0.78 - 2.97)	0.67
UBR4
Type	NumLoci	NumCont	MeanCont	NumCase	MeanCase	OR	SLP
IntronicEtc	4226	73458	0.469146	20985	0.476347	0.99 (0.98 - 1.01)	-0.35
FivePrime	10	1072	0.006846	308	0.006991	0.93 (0.81 - 1.07)	-0.52
Synonymous	971	27877	0.178039	7587	0.17222	0.98 (0.96 - 1.00)	-1.07
SpliceRegion	268	4806	0.030694	1405	0.031893	1.03 (0.97 - 1.09)	0.43
ThreePrime	30	125	0.000798	39	0.000885	1.03 (0.71 - 1.49)	0.06
ProteinAltering	1649	13043	0.0833	3563	0.080878	1.01 (0.95 - 1.07)	0.07
InDel	15	48	0.000307	9	0.000204	0.68 (0.32 - 1.41)	-0.54
Disruptive	41	44	0.000281	6	0.000136	0.50 (0.21 - 1.19)	-0.96
SpliceSite	9	12	7.7e-05	3	6.8e-05	0.78 (0.21 - 2.86)	0
SIFT	811	4042	0.025815	1079	0.024493	0.94 (0.85 - 1.04)	-0.66
PossDam	284	2292	0.014638	609	0.013824	0.98 (0.87 - 1.09)	-0.18
ProbDam	745	3572	0.022813	976	0.022155	0.99 (0.89 - 1.11)	-0.05
TXNL4A
Type	NumLoci	NumCont	MeanCont	NumCase	MeanCase	OR	SLP
IntronicEtc	177	892	0.005697	265	0.006015	1.04 (0.91 - 1.20)	0.25
FivePrime	56	468	0.002989	113	0.002565	0.86 (0.70 - 1.07)	-0.79
Synonymous	35	376	0.002401	112	0.002542	0.95 (0.76 - 1.18)	-0.19
SpliceRegion	9	26	0.000166	5	0.000113	0.71 (0.26 - 1.89)	-0.28
ThreePrime	24	871	0.005563	217	0.004926	0.87 (0.74 - 1.01)	-1.22
ProteinAltering	17	22	0.000141	6	0.000136	1.35 (0.38 - 4.79)	0
InDel	2	18	0.000115	0	0		-1.71
Disruptive	4	6	3.8e-05	0	0		-0.46
SpliceSite	2	8	5.1e-05	0	0		-0.67
SIFT	11	15	9.6e-05	3	6.8e-05	0.49 (0.05 - 5.27)	-0.11
PossDam	5	4	2.6e-05	2	4.5e-05	2.09 (0.12 - 35.20)	0.21
ProbDam	1	5	3.2e-05	0	0		-0.23
TTR
Type	NumLoci	NumCont	MeanCont	NumCase	MeanCase	OR	SLP
IntronicEtc	119	2546	0.01626	707	0.016048	0.97 (0.89 - 1.05)	-0.38
FivePrime	17	90	0.000575	32	0.000726	1.25 (0.83 - 1.91)	0.55
Synonymous	27	353	0.002254	85	0.001929	0.86 (0.67 - 1.10)	-0.65
SpliceRegion	13	47	0.0003	23	0.000522	1.46 (0.87 - 2.45)	0.84
ThreePrime	16	630	0.004024	149	0.003382	0.84 (0.69 - 1.02)	-1.11
ProteinAltering	50	1557	0.009944	363	0.00824	0.67 (0.46 - 0.98)	-1.45
InDel	2	10	6.4e-05	3	6.8e-05	1.17 (0.31 - 4.40)	0
Disruptive	5	11	7e-05	0	0		-0.86
SpliceSite	0	0	0	0	0		0
SIFT	20	1286	0.008213	298	0.006764	0.83 (0.58 - 1.20)	-0.5
PossDam	10	40	0.000255	8	0.000182	1.23 (0.52 - 2.92)	-0.31
ProbDam	11	1313	0.008386	318	0.007218	1.54 (1.00 - 2.37)	1.35
GFPT1
Type	NumLoci	NumCont	MeanCont	NumCase	MeanCase	OR	SLP
IntronicEtc	639	9798	0.062576	2774	0.062968	0.97 (0.93 - 1.02)	-0.71
FivePrime	34	117	0.000747	37	0.00084	1.11 (0.75 - 1.62)	0.22
Synonymous	91	2027	0.012946	656	0.014891	0.96 (0.87 - 1.06)	-0.39
SpliceRegion	38	542	0.003462	158	0.003587	0.97 (0.81 - 1.17)	-0.12
ThreePrime	25	967	0.006176	266	0.006038	0.95 (0.83 - 1.10)	-0.31
ProteinAltering	141	511	0.003264	100	0.00227	0.68 (0.52 - 0.88)	-2.46
InDel	0	0	0	0	0		0
Disruptive	14	17	0.000109	3	6.8e-05	0.56 (0.16 - 2.00)	-0.23
SpliceSite	3	3	1.9e-05	1	2.3e-05	1.19 (0.12 - 12.27)	0
SIFT	68	150	0.000958	28	0.000636	0.68 (0.29 - 1.61)	-0.43
PossDam	21	42	0.000268	8	0.000182	1.27 (0.51 - 3.15)	0.22
ProbDam	48	99	0.000632	21	0.000477	1.63 (0.63 - 4.21)	0.51
APPBP2
Type	NumLoci	NumCont	MeanCont	NumCase	MeanCase	OR	SLP
IntronicEtc	515	13098	0.083652	3544	0.080447	0.99 (0.96 - 1.02)	-0.22
FivePrime	48	4470	0.028548	1190	0.027012	0.94 (0.87 - 1.02)	-0.83
Synonymous	84	2856	0.01824	780	0.017706	1.00 (0.91 - 1.10)	-0.01
SpliceRegion	34	116	0.000741	42	0.000953	1.27 (0.88 - 1.83)	0.73
ThreePrime	20	654	0.004177	159	0.003609	0.87 (0.73 - 1.04)	-0.91
ProteinAltering	137	602	0.003845	151	0.003428	0.89 (0.66 - 1.19)	-0.38
InDel	2	7	4.5e-05	2	4.5e-05	0.95 (0.19 - 4.79)	0
Disruptive	6	5	3.2e-05	1	2.3e-05	0.66 (0.07 - 5.99)	0
SpliceSite	0	0	0	0	0		0
SIFT	40	68	0.000434	15	0.00034	1.07 (0.57 - 1.99)	0.08
PossDam	65	370	0.002363	82	0.001861	0.91 (0.62 - 1.33)	-0.2
ProbDam	17	23	0.000147	3	6.8e-05	0.50 (0.14 - 1.83)	-0.61
CRYZL1
Type	NumLoci	NumCont	MeanCont	NumCase	MeanCase	OR	SLP
IntronicEtc	668	15717	0.100378	4354	0.098833	0.98 (0.95 - 1.01)	-0.59
FivePrime	0	0	0	0	0		0
Synonymous	44	543	0.003468	120	0.002724	0.80 (0.65 - 0.98)	-1.56
SpliceRegion	33	142	0.000907	38	0.000863	0.98 (0.68 - 1.41)	-0.04
ThreePrime	19	49	0.000313	18	0.000409	1.28 (0.73 - 2.25)	0.43
ProteinAltering	116	4059	0.025923	1040	0.023607	0.93 (0.84 - 1.04)	-0.66
InDel	3	30	0.000192	4	9.1e-05	0.50 (0.17 - 1.45)	-0.67
Disruptive	13	39	0.000249	8	0.000182	0.77 (0.35 - 1.68)	-0.31
SpliceSite	10	15	9.6e-05	1	2.3e-05	0.22 (0.03 - 1.72)	-0.65
SIFT	62	2420	0.015456	616	0.013983	0.99 (0.86 - 1.15)	-0.05
PossDam	28	205	0.001309	50	0.001135	0.94 (0.68 - 1.31)	-0.14
ProbDam	26	66	0.000422	15	0.00034	0.78 (0.43 - 1.40)	-0.41
APOB
Type	NumLoci	NumCont	MeanCont	NumCase	MeanCase	OR	SLP
IntronicEtc	1117	22838	0.145857	6374	0.144686	0.97 (0.95 - 1.00)	-1.23
FivePrime	32	142	0.000907	61	0.001385	1.49 (1.09 - 2.03)	1.96
Synonymous	821	15953	0.101885	4547	0.103214	0.99 (0.95 - 1.02)	-0.29
SpliceRegion	79	2893	0.018476	824	0.018704	0.95 (0.87 - 1.04)	-0.63
ThreePrime	22	249	0.00159	53	0.001203	0.73 (0.53 - 1.00)	-1.31
ProteinAltering	1946	36220	0.231322	10486	0.238026	1.03 (0.99 - 1.06)	1.03
InDel	11	1206	0.007702	296	0.006719	0.88 (0.77 - 1.00)	-1.28
Disruptive	98	607	0.003877	97	0.002202	0.71 (0.60 - 0.85)	-3.74
SpliceSite	12	18	0.000115	1	2.3e-05	0.19 (0.02 - 1.44)	-1.02
SIFT	945	12627	0.080644	3723	0.08451	1.06 (0.99 - 1.14)	1.14
PossDam	379	4015	0.025642	1145	0.025991	0.97 (0.89 - 1.05)	-0.39
ProbDam	572	11701	0.07473	3386	0.07686	0.96 (0.89 - 1.02)	-0.76
STAP1
Type	NumLoci	NumCont	MeanCont	NumCase	MeanCase	OR	SLP
IntronicEtc	297	3916	0.02501	1151	0.026127	1.02 (0.95 - 1.09)	0.22
FivePrime	18	1173	0.007491	328	0.007445	1.01 (0.89 - 1.14)	0.03
Synonymous	35	247	0.001577	91	0.002066	1.08 (0.84 - 1.39)	0.27
SpliceRegion	18	1439	0.00919	428	0.009715	1.06 (0.95 - 1.19)	0.54
ThreePrime	19	71	0.000453	23	0.000522	1.08 (0.66 - 1.75)	0.12
ProteinAltering	127	941	0.00601	254	0.005766	0.94 (0.75 - 1.16)	-0.27
InDel	0	0	0	0	0		0
Disruptive	11	20	0.000128	6	0.000136	1.06 (0.41 - 2.73)	0.09
SpliceSite	10	39	0.000249	4	9.1e-05	0.36 (0.13 - 1.04)	-1.37
SIFT	58	551	0.003519	138	0.003133	1.11 (0.79 - 1.55)	0.26
PossDam	13	27	0.000172	3	6.8e-05	0.37 (0.11 - 1.28)	-0.9
ProbDam	36	311	0.001986	74	0.00168	0.80 (0.56 - 1.16)	-0.63
HMGCR
Type	NumLoci	NumCont	MeanCont	NumCase	MeanCase	OR	SLP
IntronicEtc	726	9499	0.060666	2849	0.064671	1.05 (1.01 - 1.09)	1.71
FivePrime	50	962	0.006144	286	0.006492	1.00 (0.87 - 1.15)	0.02
Synonymous	124	502	0.003206	153	0.003473	1.03 (0.85 - 1.24)	0.11
SpliceRegion	38	3378	0.021574	955	0.021678	1.02 (0.95 - 1.10)	0.22
ThreePrime	23	1212	0.007741	365	0.008285	1.06 (0.94 - 1.20)	0.47
ProteinAltering	233	1106	0.007064	305	0.006923	1.06 (0.89 - 1.26)	0.31
InDel	6	11	7e-05	2	4.5e-05	0.69 (0.15 - 3.22)	-0.13
Disruptive	16	19	0.000121	2	4.5e-05	0.38 (0.09 - 1.66)	-0.54
SpliceSite	4	3	1.9e-05	3	6.8e-05	3.79 (0.72 - 19.91)	0.91
SIFT	104	487	0.00311	116	0.002633	1.11 (0.67 - 1.83)	0.17
PossDam	26	38	0.000243	4	9.1e-05	0.32 (0.11 - 0.95)	-1.22
ProbDam	73	404	0.00258	94	0.002134	0.70 (0.41 - 1.18)	-0.76
